# Supplementary material for: Multiple antagonist calcium-dependent mechanisms control CaM kinase-1 subcellular localization in a C. elegans thermal nociceptor
Source: eLife. 2023 May 11;12:e85260. doi: 10.7554/eLife.85260 (PMC10174685; doi:10.7554/eLife.85260)
Supplement: Figure 1—source data 1. [file elife-85260-fig1-data1.xlsx]

## Sheet: Figure 1 source data
Figure 1 source data
Figure 1B					Figure 1C					Figure 1D							Figure 1E									Figure 1F
28°C	20°C	28°C	20°C		28°C	20°C	28°C	20°C		28°C	20°C	28°C	20°C	28°C	20°C		28°C	20°C	28°C	20°C	28°C	20°C	28°C	20°C		28°C	20°C	28°C	20°C	28°C	20°C
(K71A/R74Q/R77S/V292A/V294A)	(K71A/R74Q/R77S/V292A/V294A)	CMK-1(wt)	CMK-1(wt)		NLS71-78/NES288-294/NLS297-307	NLS71-78/NES288-294/NLS297-307	NLS71-78/NES288-294	NLS71-78/NES288-294		NLS71-78/NES288-294/S325A	NLS71-78/NES288-294/S325A	NLS71-78/NES288-294/NES315-323	NLS71-78/NES288-294/NES315-323	NLS71-78/NES288-294	NLS71-78/NES288-294		NES288-294/S325A	NES288-294/S325A	NES288-294	NES288-294	S325A	S325A	CMK-1(wt)	CMK-1(wt)		S325D	S325D	S325A	S325A	CMK-1(wt)	CMK-1(wt)
0.49762	0.287538	0.590775	0.294018		0.291604	0.322139	0.49762	0.287538		0.403951	0.636355	0.275436	0.513878	0.49762	0.287538		0.781004	0.955584	0.514116	0.351504	0.403061	0.544314	0.578588	0.480828		0.419992	0.341425	0.403061	0.544314	0.590775	0.294018
0.532846	0.546516	0.623502	0.350641		0.354595	0.415939	0.532846	0.546516		0.48833	0.638501	0.396978	0.542221	0.532846	0.546516		1.02356	1.14608	0.604264	0.608243	0.443766	0.549406	0.705196	0.486801		0.540772	0.421955	0.443766	0.549406	0.623502	0.350641
0.541796	0.570684	0.6449	0.408772		0.37845	0.453078	0.541796	0.570684		0.539202	0.673667	0.43756	0.601526	0.541796	0.570684		1.03899	1.27627	0.626846	0.628176	0.540998	0.552051	0.725342	0.520754		0.612661	0.469707	0.540998	0.552051	0.6449	0.408772
0.545626	0.572903	0.645435	0.409096		0.402473	0.50701	0.545626	0.572903		0.626426	0.677132	0.452292	0.604135	0.545626	0.572903		1.04182	1.29761	0.70172	0.660164	0.613782	0.568811	0.730038	0.529117		0.615518	0.476214	0.613782	0.568811	0.645435	0.409096
0.549918	0.592752	0.658204	0.448045		0.414566	0.530333	0.549918	0.592752		0.666678	0.701089	0.461527	0.608794	0.549918	0.592752		1.06962	1.41903	0.724287	0.669796	0.659727	0.574844	0.755094	0.567313		0.698546	0.486501	0.659727	0.574844	0.658204	0.448045
0.555974	0.623941	0.658658	0.467095		0.441778	0.530463	0.555974	0.623941		0.679877	0.734173	0.462502	0.613659	0.555974	0.623941		1.14342	1.47196	0.725356	0.702931	0.674361	0.580415	0.80411	0.576562		0.715826	0.492567	0.674361	0.580415	0.658658	0.467095
0.557244	0.63145	0.6655	0.468072		0.445651	0.542554	0.557244	0.63145		0.680457	0.749546	0.494609	0.648936	0.557244	0.63145		1.23982	1.48791	0.761247	0.716529	0.696921	0.582071	0.811558	0.586686		0.721829	0.494253	0.696921	0.582071	0.6655	0.468072
0.561011	0.636348	0.669988	0.468808		0.450902	0.546161	0.561011	0.636348		0.685276	0.759417	0.498449	0.672919	0.561011	0.636348		1.2961	1.5788	0.77276	0.731194	0.711482	0.586538	0.822015	0.598768		0.731237	0.501824	0.711482	0.586538	0.669988	0.468808
0.59329	0.661598	0.680463	0.504257		0.452822	0.546451	0.59329	0.661598		0.718648	0.760887	0.508641	0.679878	0.59329	0.661598		1.30962	1.59344	0.784182	0.739982	0.724968	0.610809	0.850008	0.608595		0.738425	0.512172	0.724968	0.610809	0.680463	0.504257
0.598391	0.683033	0.687726	0.51748		0.462686	0.56029	0.598391	0.683033		0.735525	0.78215	0.521388	0.681367	0.598391	0.683033		1.36254	1.63555	0.788498	0.743806	0.732506	0.612775	0.865213	0.616988		0.7397	0.529396	0.732506	0.612775	0.687726	0.51748
0.614497	0.736066	0.726894	0.518342		0.463542	0.560445	0.614497	0.736066		0.737657	0.789246	0.522927	0.681662	0.614497	0.736066		1.36766	1.71752	0.796607	0.753854	0.738959	0.624326	0.892529	0.665956		0.758248	0.557995	0.738959	0.624326	0.726894	0.518342
0.616065	0.749287	0.730697	0.520003		0.463918	0.565167	0.616065	0.749287		0.738288	0.824094	0.531302	0.687667	0.616065	0.749287		1.38817	1.72641	0.80623	0.78748	0.739848	0.632866	0.897159	0.668625		0.76581	0.560875	0.739848	0.632866	0.730697	0.520003
0.624227	0.775223	0.740046	0.525046		0.468126	0.57197	0.624227	0.775223		0.741917	0.824331	0.531422	0.704392	0.624227	0.775223		1.41203	1.74021	0.809378	0.792982	0.742508	0.633077	0.897853	0.672258		0.771906	0.570408	0.742508	0.633077	0.740046	0.525046
0.634391	0.789242	0.751302	0.533197		0.469969	0.57761	0.634391	0.789242		0.769146	0.844378	0.535192	0.710184	0.634391	0.789242		1.41675	1.75211	0.835008	0.794299	0.768042	0.638638	0.901035	0.674762		0.793516	0.571447	0.768042	0.638638	0.751302	0.533197
0.642191	0.793328	0.756872	0.542768		0.475686	0.585277	0.642191	0.793328		0.770352	0.851884	0.545192	0.713893	0.642191	0.793328		1.44153	1.77784	0.851516	0.79797	0.768213	0.640094	0.923345	0.684085		0.799412	0.576026	0.768213	0.640094	0.756872	0.542768
0.643294	0.797683	0.766572	0.543117		0.478933	0.596756	0.643294	0.797683		0.77405	0.904207	0.550622	0.717062	0.643294	0.797683		1.45726	1.82856	0.85362	0.799497	0.777778	0.648705	0.97678	0.703357		0.810133	0.584811	0.777778	0.648705	0.766572	0.543117
0.645091	0.814426	0.783417	0.552342		0.482899	0.609832	0.645091	0.814426		0.7902	0.907253	0.565122	0.717368	0.645091	0.814426		1.49679	1.86407	0.88807	0.809223	0.805154	0.650698	0.98125	0.707565		0.827413	0.586332	0.805154	0.650698	0.783417	0.552342
0.654599	0.83588	0.787051	0.555416		0.491548	0.612504	0.654599	0.83588		0.800796	0.924378	0.565326	0.726496	0.654599	0.83588		1.59744	1.96062	0.897032	0.829226	0.811813	0.65125	1	0.720003		0.845835	0.591896	0.811813	0.65125	0.787051	0.555416
0.684741	0.844562	0.788489	0.566755		0.492317	0.616029	0.684741	0.844562		0.808806	0.936876	0.571094	0.732192	0.684741	0.844562		1.67323	1.96746	0.920898	0.843196	0.833509	0.651712	1.02304	0.73309		0.855911	0.608698	0.833509	0.651712	0.788489	0.566755
0.685141	0.862496	0.790604	0.584831		0.505468	0.621042	0.685141	0.862496		0.812405	0.954816	0.572387	0.738883	0.685141	0.862496		1.68257	2.04892	0.957765	0.854583	0.845296	0.656012	1.02749	0.734637		0.858229	0.614853	0.845296	0.656012	0.790604	0.584831
0.686453	0.866329	0.799819	0.589971		0.517181	0.622929	0.686453	0.866329		0.821059	0.967474	0.576679	0.744081	0.686453	0.866329		1.68547	2.29702	0.959268	0.855362	0.864708	0.671742	1.04367	0.748332		0.869523	0.616147	0.864708	0.671742	0.799819	0.589971
0.689978	0.875	0.802384	0.590087		0.517686	0.623992	0.689978	0.875		0.83244	1.02636	0.580062	0.755199	0.689978	0.875		1.73742	2.31043	0.974661	0.857174	0.877417	0.673985	1.05333	0.750189		0.901025	0.624527	0.877417	0.673985	0.802384	0.590087
0.699496	0.87914	0.823488	0.590344		0.520901	0.632548	0.699496	0.87914		0.834803	1.06207	0.582507	0.75884	0.699496	0.87914		1.77905	2.53222	1.01119	0.860514	0.890621	0.688163	1.05937	0.757595		0.905296	0.626618	0.890621	0.688163	0.823488	0.590344
0.701281	0.906185	0.829397	0.597197		0.520926	0.642239	0.701281	0.906185		0.856429	1.06658	0.58306	0.759811	0.701281	0.906185		1.81568	3.07594	1.02442	0.872929	0.902305	0.690695	1.07528	0.76803		0.906635	0.628757	0.902305	0.690695	0.829397	0.597197
0.711889	0.924058	0.831311	0.598268		0.530766	0.644216	0.711889	0.924058		0.857146	1.07817	0.58328	0.762399	0.711889	0.924058		1.84679	3.69748	1.0258	0.873275	0.904452	0.696236	1.07719	0.774928		0.920923	0.629686	0.904452	0.696236	0.831311	0.598268
0.713861	0.935763	0.832974	0.604808		0.532845	0.654715	0.713861	0.935763		0.860152	1.08098	0.58535	0.763833	0.713861	0.935763		1.90335	0.466764	1.04625	0.873862	0.905658	0.706712	1.10502	0.786624		0.931041	0.638315	0.905658	0.706712	0.832974	0.604808
0.716254	0.936826	0.835577	0.605763		0.533115	0.665007	0.716254	0.936826		0.862897	1.10852	0.586567	0.770788	0.716254	0.936826		1.95347	0.671826	1.05153	0.877492	0.91884	0.710862	1.1274	0.790375		0.935465	0.641216	0.91884	0.710862	0.835577	0.605763
0.719683	0.936952	0.835597	0.60916		0.538282	0.676722	0.719683	0.936952		0.864952	1.13354	0.588566	0.775903	0.719683	0.936952		1.96399	0.816002	1.09435	0.878739	0.93144	0.715359	1.12996	0.792435		0.942347	0.651828	0.93144	0.715359	0.835597	0.60916
0.729387	0.944881	0.835599	0.613633		0.543958	0.677133	0.729387	0.944881		0.874988	1.13582	0.590432	0.777427	0.729387	0.944881		2	0.891047	1.10224	0.884764	0.937939	0.716232	1.14303	0.795605		0.97429	0.663619	0.937939	0.716232	0.835599	0.613633
0.736502	0.951054	0.838851	0.615541		0.543984	0.692026	0.736502	0.951054		0.901483	1.18909	0.591388	0.781808	0.736502	0.951054		2.08571	0.985945	1.12507	0.889838	0.978825	0.716486	1.16289	0.813023		0.987629	0.666066	0.978825	0.716486	0.838851	0.615541
0.746451	0.971924	0.844778	0.617144		0.545114	0.693278	0.746451	0.971924		0.903011	1.20922	0.595402	0.783914	0.746451	0.971924		2.08629	1.09952	1.12983	0.89278	0.984232	0.71824	1.16499	0.813499		0.995953	0.667139	0.984232	0.71824	0.844778	0.617144
0.750836	0.979454	0.847683	0.624527		0.548515	0.697761	0.750836	0.979454		0.911102	1.21913	0.60089	0.78865	0.750836	0.979454		2.1621	1.11018	1.14081	0.893364	0.995798	0.740738	1.16892	0.818175		1.00294	0.66976	0.995798	0.740738	0.847683	0.624527
0.75138	0.997151	0.851739	0.625454		0.55629	0.700974	0.75138	0.997151		0.912253	1.29263	0.60103	0.792018	0.75138	0.997151		2.25839	1.12481	1.16671	0.898239	1.008	0.744353	1.17691	0.81854		1.01363	0.67013	1.008	0.744353	0.851739	0.625454
0.75214	1.06468	0.852181	0.629054		0.556498	0.708443	0.75214	1.06468		0.919199	1.29565	0.601104	0.797347	0.75214	1.06468		2.26164	1.45433	1.17549	0.900817	1.01502	0.756909	1.17941	0.823543		1.0142	0.672155	1.01502	0.756909	0.852181	0.629054
0.759905	1.09489	0.85335	0.635871		0.55656	0.712181	0.759905	1.09489		0.948403	1.30288	0.60402	0.807508	0.759905	1.09489		2.4771	1.6046	1.19884	0.907322	1.02043	0.759686	1.18107	0.823916		1.01869	0.672201	1.02043	0.759686	0.85335	0.635871
0.765217	1.09704	0.85445	0.636666		0.567958	0.71428	0.765217	1.09704		0.948498	1.31719	0.608658	0.808903	0.765217	1.09704		2.55474	1.66569	1.20844	0.90764	1.022	0.75998	1.20076	0.829129		1.02145	0.680607	1.022	0.75998	0.85445	0.636666
0.767262	1.09923	0.856618	0.638662		0.570102	0.71488	0.767262	1.09923		0.95	1.38439	0.609669	0.810621	0.767262	1.09923		2.58545	1.01185	1.21333	0.91308	1.02609	0.774728	1.20948	0.834723		1.02963	0.693486	1.02609	0.774728	0.856618	0.638662
0.769549	1.10423	0.860602	0.642405		0.57123	0.723904	0.769549	1.10423		0.96196	1.38916	0.61307	0.81464	0.769549	1.10423		2.59758	1.05171	1.23337	0.928266	1.02792	0.779265	1.21398	0.852824		1.03164	0.698921	1.02792	0.779265	0.860602	0.642405
0.775439	1.12435	0.862539	0.646833		0.571745	0.728635	0.775439	1.12435		0.963178	1.42925	0.622153	0.814889	0.775439	1.12435		2.91409	1.17519	1.24021	0.934507	1.05012	0.780409	1.22488	0.877868		1.04075	0.700741	1.05012	0.780409	0.862539	0.646833
0.776364	1.22348	0.871819	0.650001		0.579764	0.730826	0.776364	1.22348		0.964603	1.44801	0.622345	0.818319	0.776364	1.22348		0.975565	1.20821	1.25367	0.937613	1.06335	0.792782	1.22589	0.890019		1.04347	0.714633	1.06335	0.792782	0.871819	0.650001
0.776382	1.22805	0.8719	0.651736		0.583003	0.731146	0.776382	1.22805		0.980834	1.46406	0.62396	0.831814	0.776382	1.22805		1.03205	1.25618	1.25523	0.938031	1.0636	0.794948	1.22727	0.891376		1.04415	0.715667	1.0636	0.794948	0.8719	0.651736
0.777589	1.23669	0.87643	0.660401		0.585691	0.73269	0.777589	1.23669		0.982524	1.47552	0.626691	0.83347	0.777589	1.23669		1.05851	1.28756	1.27022	0.939622	1.07181	0.79895	1.23836	0.908548		1.05557	0.722837	1.07181	0.79895	0.87643	0.660401
0.777935	1.25458	0.87869	0.666119		0.587291	0.733326	0.777935	1.25458		0.987806	1.48272	0.626821	0.834945	0.777935	1.25458		1.08585	1.4088	1.28507	0.939932	1.07439	0.802825	1.24555	0.914115		1.05603	0.724594	1.07439	0.802825	0.87869	0.666119
0.779259	1.26402	0.888275	0.666673		0.592585	0.738525	0.779259	1.26402		0.99403	1.49442	0.628491	0.836114	0.779259	1.26402		1.09556	1.47248	1.28637	0.943574	1.07567	0.805426	1.25344	0.931481		1.06415	0.731457	1.07567	0.805426	0.888275	0.666673
0.785643	1.27347	0.89489	0.667255		0.592944	0.739481	0.785643	1.27347		1.00213	1.51275	0.629728	0.841369	0.785643	1.27347		1.14013	1.48285	1.36162	0.950245	1.08271	0.807009	1.25421	0.973382		1.06731	0.736774	1.08271	0.807009	0.89489	0.667255
0.785829	1.28915	0.896931	0.672183		0.593667	0.739923	0.785829	1.28915		1.02793	1.58124	0.63567	0.842621	0.785829	1.28915		1.14777	1.50427	1.42673	0.96389	1.11007	0.808412	1.28688	0.985602		1.07266	0.738563	1.11007	0.808412	0.896931	0.672183
0.787641	1.28978	0.901104	0.672876		0.597767	0.742763	0.787641	1.28978		1.04111	1.69383	0.63831	0.842757	0.787641	1.28978		1.20005	1.54521	1.43162	0.970049	1.11196	0.810214	1.29809	0.996518		1.08252	0.743342	1.11196	0.810214	0.901104	0.672876
0.789547	1.31236	0.904978	0.679565		0.60131	0.743838	0.789547	1.31236		1.0444	1.73865	0.639225	0.842777	0.789547	1.31236		1.20912	1.55306	1.44113	0.970609	1.11908	0.817184	1.40315	1.02372		1.08762	0.745192	1.11908	0.817184	0.904978	0.679565
0.794656	1.32359	0.906482	0.68559		0.605785	0.753476	0.794656	1.32359		1.05349	1.90014	0.645615	0.842789	0.794656	1.32359		1.25449	1.56133	1.54963	0.972719	1.13453	0.817185	1.40536	1.05505		1.0924	0.761565	1.13453	0.817185	0.906482	0.68559
0.802973	1.38267	0.909817	0.688789		0.606345	0.758741	0.802973	1.38267		1.05932	0.542843	0.650528	0.861233	0.802973	1.38267		1.26034	1.57368	1.58539	0.976086	1.15129	0.821136	1.41116	1.07616		1.09425	0.762529	1.15129	0.821136	0.909817	0.688789
0.803591	1.51999	0.918314	0.690741		0.608263	0.762407	0.803591	1.51999		1.06748	0.659576	0.65818	0.868056	0.803591	1.51999		1.26255	1.63268	1.63295	0.976621	1.1917	0.828909	1.43148	1.12016		1.10982	0.764495	1.1917	0.828909	0.918314	0.690741
0.805049	1.64441	0.918767	0.693852		0.608497	0.763852	0.805049	1.64441		1.06836	0.707665	0.661557	0.872988	0.805049	1.64441		1.39033	1.81757	0.595392	0.976712	1.1979	0.83759	1.44807			1.12444	0.765482	1.1979	0.83759	0.918767	0.693852
0.823298	1.9759	0.919119	0.694812		0.608789	0.765361	0.823298	1.9759		1.07554	0.72556	0.666675	0.874389	0.823298	1.9759		1.4198	1.82737	0.643325	0.984428	1.19929	0.838297	1.48951			1.16199	0.775407	1.19929	0.838297	0.919119	0.694812
0.827196	1.98157	0.921767	0.699518		0.610847	0.772644	0.827196	1.98157		1.08986	0.758557	0.667338	0.877222	0.827196	1.98157		1.53077	1.85559	0.664669	0.988617	1.20163	0.838321	1.53192			1.16639	0.775924	1.20163	0.838321	0.921767	0.699518
0.832119	0.1905	0.926217	0.703111		0.611534	0.775305	0.832119	0.1905		1.09814	0.774347	0.675608	0.878847	0.832119	0.1905		1.59058	1.89068	0.703905	0.993033	1.2054	0.850217	1.56743			1.1681	0.779384	1.2054	0.850217	0.926217	0.703111
0.84308	0.215716	0.927683	0.704697		0.615208	0.78567	0.84308	0.215716		1.09887	0.783795	0.685429	0.881171	0.84308	0.215716		1.87327	1.92365	0.747011	0.995874	1.2119	0.8508	1.60459			1.16918	0.782584	1.2119	0.8508	0.927683	0.704697
0.843565	0.414288	0.950228	0.705879		0.616787	0.792812	0.843565	0.414288		1.17464	0.82825	0.691688	0.886044	0.843565	0.414288		2.37308	1.94265	0.755152	0.996304	1.21239	0.877764	1.61351			1.18022	0.788488	1.21239	0.877764	0.950228	0.705879
0.853363	0.534465	0.954172	0.707031		0.618641	0.797783	0.853363	0.534465		1.1871	0.830773	0.695789	0.890535	0.853363	0.534465		3.98024	2.17727	0.769414	0.997468	1.2296	0.877885	1.61451			1.18405	0.790801	1.2296	0.877885	0.954172	0.707031
0.855838	0.557944	0.955789	0.709129		0.622758	0.799275	0.855838	0.557944		1.21539	0.840699	0.699563	0.896443	0.855838	0.557944		0.958689	2.35969	0.775591	0.998137	1.24967	0.884599	1.64158			1.18448	0.791576	1.24967	0.884599	0.955789	0.709129
0.870288	0.581138	0.959304	0.709832		0.623433	0.800014	0.870288	0.581138		1.2619	0.897422	0.704266	0.897877	0.870288	0.581138		1.04405	2.40792	0.794785	1	1.2566	0.886276	1.64559			1.1853	0.792329	1.2566	0.886276	0.959304	0.709832
0.878762	0.60429	0.96633	0.71341		0.636925	0.808534	0.878762	0.60429		1.30162	0.899985	0.706334	0.897962	0.878762	0.60429		1.17384	0.598889	0.808819	1.00095	1.25885	0.889426	1.6636			1.18667	0.79506	1.25885	0.889426	0.96633	0.71341
0.879211	0.620048	0.968239	0.718519		0.640058	0.813097	0.879211	0.620048		1.36755	0.908914	0.706888	0.902421	0.879211	0.620048		1.19065	1.07972	0.810444	1.00436	1.27125	0.889719	1.7633			1.19533	0.7958	1.27125	0.889719	0.968239	0.718519
0.885148	0.649614	0.971076	0.720209		0.640583	0.821578	0.885148	0.649614		1.46091	0.953681	0.710641	0.905982	0.885148	0.649614		1.26531	1.0918	0.814459	1.01681	1.28237	0.896833	2.02465			1.22219	0.813999	1.28237	0.896833	0.971076	0.720209
0.908126	0.659612	0.972397	0.725568		0.640616	0.824247	0.908126	0.659612		1.7092	0.967031	0.711143	0.907941	0.908126	0.659612		1.32508	1.16519	0.816726	1.02166	1.32117	0.908585	2.07647			1.2222	0.818095	1.32117	0.908585	0.972397	0.725568
0.915688	0.694706	0.973111	0.733185		0.642255	0.834361	0.915688	0.694706		0.621406	0.983158	0.712095	0.909401	0.915688	0.694706		1.36014	1.22037	0.826536	1.02506	1.33149	0.923627				1.2228	0.840827	1.33149	0.923627	0.973111	0.733185
0.91889	0.695991	0.980664	0.734465		0.646867	0.837088	0.91889	0.695991		0.641197	1.02845	0.716253	0.913831	0.91889	0.695991		1.40962	1.24723	0.833716	1.02794	1.3342	0.945637				1.23293	0.843153	1.3342	0.945637	0.980664	0.734465
0.925614	0.698057	0.987634	0.734985		0.647533	0.845879	0.925614	0.698057		0.764277	1.24459	0.725766	0.925151	0.925614	0.698057		1.54642	1.31376	0.843262	1.02923	1.33433	0.949957				1.23485	0.847503	1.33433	0.949957	0.987634	0.734985
0.933706	0.706404	0.990888	0.736589		0.654521	0.853902	0.933706	0.706404		0.766171	0.492045	0.726969	0.932516	0.933706	0.706404		1.60708	1.35089	0.846111	1.03537	1.34681	0.952935				1.24776	0.860813	1.34681	0.952935	0.990888	0.736589
1.02539	0.71955	0.992997	0.736778		0.656941	0.856772	1.02539	0.71955		0.785591	0.496609	0.728537	0.936338	1.02539	0.71955		1.61017	1.52571	0.862842	1.03541	1.36219	0.953867				1.26365	0.873064	1.36219	0.953867	0.992997	0.736778
1.02868	0.727478	0.994042	0.738839		0.660283	0.867455	1.02868	0.727478		0.910487	0.544863	0.730567	0.942646	1.02868	0.727478		1.71375	1.75039	0.867462	1.03922	1.37664	0.970867				1.27554	0.875596	1.37664	0.970867	0.994042	0.738839
1.05752	0.736115	0.99841	0.743271		0.666676	0.870721	1.05752	0.736115		0.916179	0.561094	0.733522	0.946652	1.05752	0.736115		1.87086	0.932676	0.880914	1.04181	1.3805	0.998861				1.27776	0.88779	1.3805	0.998861	0.99841	0.743271
1.08568	0.749695	0.99874	0.745429		0.667145	0.870762	1.08568	0.749695		1.07249	0.615542	0.736014	0.95136	1.08568	0.749695		1.98975	1.11298	0.882846	1.04193	1.38683	1				1.31443	0.88888	1.38683	1	0.99874	0.745429
1.1031	0.759325	1.0048	0.74638		0.669607	0.877102	1.1031	0.759325		1.22442	0.687241	0.749378	0.954349	1.1031	0.759325		2.03447	1.12012	0.889724	1.04233	1.39729	1				1.31967	0.902962	1.39729	1	1.0048	0.74638
1.22233	0.785215	1.00895	0.7473		0.671629	0.882479	1.22233	0.785215		1.2984	0.693735	0.750335	0.963953	1.22233	0.785215		2.06789	1.21505	0.890468	1.04392	1.4	1.0106				1.32176	0.904463	1.4	1.0106	1.00895	0.7473
1.48543	0.788179	1.01226	0.747531		0.673317	0.883164	1.48543	0.788179		1.40179	0.72345	0.754363	0.965214	1.48543	0.788179		2.10761	1.2503	0.893186	1.04639	1.42107	1.02157				1.34285	0.914903	1.42107	1.02157	1.01226	0.747531
0.382472	0.799748	1.01231	0.748605		0.675179	0.883256	0.382472	0.799748		1.41287	0.726214	0.754709	0.971454	0.382472	0.799748		2.32901	1.37719	0.893632	1.04832	1.42364	1.0379				1.3503	0.927953	1.42364	1.0379	1.01231	0.748605
0.457099	0.811066	1.01289	0.749054		0.676005	0.885584	0.457099	0.811066		1.4674	0.737624	0.75555	0.973319	0.457099	0.811066		2.3337	1.56751	0.909119	1.054	1.43477	1.03872				1.3546	0.947531	1.43477	1.03872	1.01289	0.749054
0.49324	0.897251	1.01605	0.751807		0.679658	0.895058	0.49324	0.897251		1.48302	0.738876	0.75621	0.982434	0.49324	0.897251		2.67343	1.58625	0.918402	1.05526	1.45035	1.04852				1.3562	0.947783	1.45035	1.04852	1.01605	0.751807
0.507045	0.915473	1.01747	0.764338		0.683405	0.90879	0.507045	0.915473		1.58297	0.767993	0.757388	0.990118	0.507045	0.915473		1.29604	1.65313	0.920422	1.0595	1.46193	1.06496				1.36099	0.96787	1.46193	1.06496	1.01747	0.764338
0.513199	0.915633	1.02306	0.767078		0.68742	0.914552	0.513199	0.915633		1.58353	0.770686	0.76106	0.993686	0.513199	0.915633		1.34607	1.66454	0.9315	1.05976	1.46269	1.08372				1.36646	0.971374	1.46269	1.08372	1.02306	0.767078
0.518009	0.942995	1.02541	0.767552		0.690248	0.918422	0.518009	0.942995		0.479949	0.776794	0.761886	0.994981	0.518009	0.942995		1.39323	1.75178	0.946969	1.06186	1.47907	1.08636				1.36823	0.976852	1.47907	1.08636	1.02541	0.767552
0.524796	0.975835	1.03408	0.769764		0.694999	0.930414	0.524796	0.975835		0.519269	0.793203	0.762909	1	0.524796	0.975835		1.39861	1.82138	0.952464	1.06352	1.48959	1.09977				1.3741	0.987192	1.48959	1.09977	1.03408	0.769764
0.545662	0.981039	1.03744	0.773367		0.704399	0.948304	0.545662	0.981039		0.523052	0.800993	0.766903	1.0017	0.545662	0.981039		1.4239	1.82222	0.952605	1.06358	1.50148	1.10482				1.38668	1.02277	1.50148	1.10482	1.03744	0.773367
0.55107	0.985263	1.04079	0.775089		0.708764	0.948804	0.55107	0.985263		0.571665	0.802985	0.767577	1.00371	0.55107	0.985263		1.46691	1.87055	0.955675	1.06608	1.5031	1.10572				1.44625	1.02644	1.5031	1.10572	1.04079	0.775089
0.556187	0.988244	1.04091	0.779689		0.710176	0.958802	0.556187	0.988244		0.58998	0.805895	0.770673	1.00591	0.556187	0.988244		1.4741	1.88817	0.957954	1.06633	1.50429	1.13219				1.47236	1.03995	1.50429	1.13219	1.04091	0.779689
0.562538	0.99275	1.04098	0.784972		0.711527	0.960103	0.562538	0.99275		0.592664	0.81057	0.778768	1.00715	0.562538	0.99275		1.47432	1.95428	0.960131	1.06963	1.50834	1.1798				1.4919	1.14034	1.50834	1.1798	1.04098	0.784972
0.580955	0.993663	1.04166	0.787343		0.715217	0.961045	0.580955	0.993663		0.600047	0.821927	0.790031	1.01112	0.580955	0.993663		1.51419	1.99595	0.960854	1.07101	1.50851	1.19038				1.51793	1.28124	1.50851	1.19038	1.04166	0.787343
0.584	0.995213	1.04184	0.797946		0.715348	0.97375	0.584	0.995213		0.624496	0.829262	0.792144	1.01567	0.584	0.995213		1.79448	2.12628	0.961096	1.07116	1.51002	1.20934				1.53297	1.40911	1.51002	1.20934	1.04184	0.797946
0.584997	1.01054	1.04489	0.799128		0.71862	0.976614	0.584997	1.01054		0.632933	0.834416	0.79249	1.01858	0.584997	1.01054		1.91232	2.73203	0.963141	1.07213	1.52545	1.3163				1.57426	0.310275	1.52545	1.3163	1.04489	0.799128
0.589344	1.01741	1.04637	0.799761		0.72955	0.980585	0.589344	1.01741		0.639046	0.837009	0.794052	1.02224	0.589344	1.01741		2.52172	0.814416	0.964524	1.07328	1.55227	1.31682				1.59417	0.40351	1.55227	1.31682	1.04637	0.799761
0.605497	1.01851	1.05492	0.802448		0.73229	1.00109	0.605497	1.01851		0.641699	0.842299	0.794413	1.02303	0.605497	1.01851		3.36813	1.05524	0.964851	1.08067	1.57665	1.32376				1.60267	0.418639	1.57665	1.32376	1.05492	0.802448
0.609945	1.03314	1.05796	0.807196		0.737078	1.00641	0.609945	1.03314		0.654343	0.843429	0.796771	1.02702	0.609945	1.03314		1.01754	1.06029	0.964851	1.08563	1.60704	1.43062				1.61409	0.459353	1.60704	1.43062	1.05796	0.807196
0.612888	1.04323	1.05874	0.807612		0.744033	1.04973	0.612888	1.04323		0.658545	0.843948	0.797353	1.03246	0.612888	1.04323		1.05721	1.75407	0.971517	1.08773	1.64581	1.46242				1.61979	0.4774	1.64581	1.46242	1.05874	0.807612
0.615509	1.05124	1.06777	0.814322		0.746026	1.05394	0.615509	1.05124		0.674821	0.848177	0.800437	1.04021	0.615509	1.05124		1.07359	2.13666	0.974562	1.09001	1.7032	1.5525				1.62364	0.479379	1.7032	1.5525	1.06777	0.814322
0.619041	1.06435	1.07572	0.821648		0.749802	1.05856	0.619041	1.06435		0.677641	0.85241	0.801108	1.04226	0.619041	1.06435		1.08965	2.23136	0.977216	1.09128	1.77532	1.62808				1.62768	0.496765	1.77532	1.62808	1.07572	0.821648
0.62139	1.06557	1.08344	0.838491		0.75474	1.06471	0.62139	1.06557		0.685724	0.853512	0.802863	1.04742	0.62139	1.06557		1.3592	2.36153	0.978298	1.09223	1.79889	1.71158				1.73685	0.497169	1.79889	1.71158	1.08344	0.838491
0.621851	1.07912	1.08713	0.841507		0.754979	1.08251	0.621851	1.07912		0.687933	0.853576	0.812425	1.05322	0.621851	1.07912		1.46909	2.55598	0.979537	1.0944	1.84607	0.462384				1.78208	0.509387	1.84607	0.462384	1.08713	0.841507
0.621928	1.09229	1.0914	0.842359		0.762898	1.08928	0.621928	1.09229		0.689652	0.860955	0.818454	1.06638	0.621928	1.09229		1.55569		0.984729	1.09593	1.84639	0.477898				1.79504	0.530208	1.84639	0.477898	1.0914	0.842359
0.62233	1.16058	1.11241	0.845143		0.766111	1.0969	0.62233	1.16058		0.689801	0.872113	0.826148	1.0665	0.62233	1.16058		1.60416		0.986405	1.098	1.86758	0.480082				1.84494	0.533338	1.86758	0.480082	1.11241	0.845143
0.62234	1.16188	1.11272	0.845209		0.784436	1.11757	0.62234	1.16188		0.695324	0.876662	0.826548	1.08369	0.62234	1.16188		1.68891		0.989918	1.09966	1.89756	0.51921				1.86744	0.543119	1.89756	0.51921	1.11272	0.845209
0.62762	1.17	1.11549	0.8477		0.793366	1.12594	0.62762	1.17		0.698134	0.889556	0.830457	1.08372	0.62762	1.17		1.72831		0.9952	1.10138	1.96104	0.555209				1.99469	0.544714	1.96104	0.555209	1.11549	0.8477
0.631402	1.17024	1.11758	0.855392		0.811256	1.14606	0.631402	1.17024		0.704626	0.891107	0.830898	1.10167	0.631402	1.17024		1.75592		0.996373	1.10859	0.557521	0.567961				0.446984	0.550882	0.557521	0.567961	1.11758	0.855392
0.637672	1.21682	1.11928	0.860459		0.815469	1.26046	0.637672	1.21682		0.717604	0.903686	0.831293	1.12	0.637672	1.21682		1.8395		0.996807	1.10966	0.613452	0.573522				0.533569	0.552065	0.613452	0.573522	1.11928	0.860459
0.64084	1.22642	1.15011	0.86191		0.816239	1.36484	0.64084	1.22642		0.722747	0.907885	0.831555	1.13162	0.64084	1.22642		1.94291		0.999381	1.11015	0.645311	0.575244				0.560075	0.557495	0.645311	0.575244	1.15011	0.86191
0.655537	1.2347	1.16951	0.868844		0.820515	0.446719	0.655537	1.2347		0.728377	0.915999	0.8435	1.1333	0.655537	1.2347		2.00592		0.999535	1.11103	0.767991	0.576687				0.5702	0.569805	0.767991	0.576687	1.16951	0.868844
0.661984	1.23504	1.1736	0.87901		0.827585	0.462249	0.661984	1.23504		0.729706	0.967551	0.846506	1.13595	0.661984	1.23504		2.04726		1	1.11282	0.79673	0.600006				0.614181	0.574644	0.79673	0.600006	1.1736	0.87901
0.679118	1.24152	1.17412	0.884775		0.828634	0.473553	0.679118	1.24152		0.732945	1.00894	0.862343	1.13714	0.679118	1.24152		2.08533		1.0042	1.11422	0.803156	0.62668				0.62355	0.58479	0.803156	0.62668	1.17412	0.884775
0.681374	1.26062	1.17754	0.885612		0.833009	0.503184	0.681374	1.26062		0.741869	1.01264	0.862641	1.14025	0.681374	1.26062		2.43886		1.00422	1.11994	0.816351	0.644707				0.670362	0.585252	0.816351	0.644707	1.17754	0.885612
0.687648	1.26862	1.18137	0.888684		0.833311	0.529215	0.687648	1.26862		0.742663	1.01351	0.863083	1.15814	0.687648	1.26862		2.44111		1.01347	1.12143	0.825397	0.646928				0.726336	0.592211	0.825397	0.646928	1.18137	0.888684
0.692116	1.3015	1.18162	0.899911		0.835455	0.534189	0.692116	1.3015		0.743329	1.02962	0.866104	1.16356	0.692116	1.3015		2.61463		1.01492	1.1299	0.832304	0.654696				0.737657	0.59678	0.832304	0.654696	1.18162	0.899911
0.704312	1.31238	1.19276	0.910713		0.852215	0.534432	0.704312	1.31238		0.754226	1.03564	0.86891	1.17541	0.704312	1.31238		3.64675		1.02571	1.13798	0.836117	0.65638				0.748759	0.607405	0.836117	0.65638	1.19276	0.910713
0.706014	1.325	1.19507	0.960854		0.864364	0.540013	0.706014	1.325		0.754789	1.04362	0.87339	1.19058	0.706014	1.325		0.621461		1.04748	1.13929	0.837209	0.667536				0.749186	0.613558	0.837209	0.667536	1.19507	0.960854
0.706697	1.35171	1.20308	0.962724		0.88053	0.547025	0.706697	1.35171		0.758123	1.04941	0.876516	1.1951	0.706697	1.35171		0.794494		1.05184	1.14358	0.840935	0.672942				0.752184	0.619888	0.840935	0.672942	1.20308	0.962724
0.711405	1.3786	1.20525	0.972351		0.896551	0.54756	0.711405	1.3786		0.771683	1.05036	0.893174	1.21692	0.711405	1.3786		0.795555		1.06568	1.14416	0.845438	0.674463				0.770579	0.634235	0.845438	0.674463	1.20525	0.972351
0.712787	1.3952	1.20559	0.980806		0.908818	0.55263	0.712787	1.3952		0.773047	1.05441	0.893493	1.21875	0.712787	1.3952		0.874302		1.07297	1.14475	0.882914	0.679841				0.772153	0.637497	0.882914	0.679841	1.20559	0.980806
0.71465	1.42759	1.21627	0.988629		0.915559	0.55545	0.71465	1.42759		0.781463	1.0673	0.896212	1.24162	0.71465	1.42759		0.985424		1.07986	1.14647	0.904787	0.690439				0.776879	0.63789	0.904787	0.690439	1.21627	0.988629
0.721613	1.47652	1.22279	1.01655		0.929126	0.564425	0.721613	1.47652		0.789119	1.09226	0.896589	1.24309	0.721613	1.47652		1.0237		1.10408	1.14688	0.909565	0.698514				0.78246	0.638336	0.909565	0.698514	1.22279	1.01655
0.723645	1.53729	1.23801	1.02368		0.934581	0.574945	0.723645	1.53729		0.789672	1.11075	0.908585	1.24796	0.723645	1.53729		1.10847		1.12577	1.14982	0.926289	0.703374				0.785045	0.649649	0.926289	0.703374	1.23801	1.02368
0.726485	1.56029	1.24327	1.03281		0.935723	0.58298	0.726485	1.56029		0.789719	1.12156	0.915046	1.25167	0.726485	1.56029		1.15328		1.13162	1.15228	0.931709	0.703869				0.786944	0.651874	0.931709	0.703869	1.24327	1.03281
0.727447	1.69492	1.26349	1.07228		0.941708	0.583661	0.727447	1.69492		0.810855	1.1275	0.919431	1.26467	0.727447	1.69492		1.15635		1.1577	1.15366	0.932183	0.713337				0.78822	0.654755	0.932183	0.713337	1.26349	1.07228
0.733851	1.6974	1.26578	1.09377		0.94425	0.606524	0.733851	1.6974		0.813179	1.12895	0.931094	1.27161	0.733851	1.6974		1.27292		1.15993	1.1589	0.937545	0.715112				0.789871	0.657103	0.937545	0.715112	1.26578	1.09377
0.751213	1.92505	1.26879	1.11015		0.977755	0.610366	0.751213	1.92505		0.814207	1.137	0.931867	1.29747	0.751213	1.92505		1.3037		1.16304	1.16293	0.953029	0.728468				0.793909	0.662653	0.953029	0.728468	1.26879	1.11015
0.754763	0.517033	1.30074	1.11884		0.98738	0.630958	0.754763	0.517033		0.827371	1.1578	0.936836	1.30656	0.754763	0.517033		1.43164		1.17304	1.16315	0.957661	0.738758				0.816173	0.662704	0.957661	0.738758	1.30074	1.11884
0.774762	0.536667	1.30749	1.18138		0.353802	0.642717	0.774762	0.536667		0.828643	1.16738	0.948045	1.38983	0.774762	0.536667		1.49341		1.20438	1.16442	0.961592	0.747507				0.826805	0.663932	0.961592	0.747507	1.30749	1.18138
0.7762	0.619508	1.34587	0.304173		0.366627	0.649574	0.7762	0.619508		0.831264	1.19701	0.957015	0.478892	0.7762	0.619508		1.66669		1.21203	1.16642	0.963367	0.752652				0.827864	0.665444	0.963367	0.752652	1.34587	0.304173
0.78459	0.655214	1.35369	0.361729		0.380236	0.651845	0.78459	0.655214		0.84074	1.19933	0.967529	0.526433	0.78459	0.655214		1.70633		1.21653	1.17308	0.963525	0.753324				0.833444	0.677205	0.963525	0.753324	1.35369	0.361729
0.80715	0.682196	1.35809	0.385079		0.397747	0.653637	0.80715	0.682196		0.844184	1.21308	0.970928	0.526786	0.80715	0.682196		1.7265		1.22901	1.17574	0.992141	0.756224				0.840222	0.677444	0.992141	0.756224	1.35809	0.385079
0.819479	0.697776	1.36129	0.415001		0.398996	0.654818	0.819479	0.697776		0.85128	1.23301	0.984916	0.541223	0.819479	0.697776		1.8026		1.23153	1.1781	0.994813	0.759727				0.856398	0.684666	0.994813	0.759727	1.36129	0.415001
0.821198	0.702261	1.37592	0.445489		0.399451	0.656287	0.821198	0.702261		0.861334	1.25274	0.990607	0.579741	0.821198	0.702261		2.03912		1.23826	1.18478	0.997578	0.761614				0.858097	0.688078	0.997578	0.761614	1.37592	0.445489
0.822413	0.734875	1.3888	0.452173		0.405976	0.65955	0.822413	0.734875		0.863605	1.26439	0.991937	0.599163	0.822413	0.734875		2.07956		1.26488	1.18617	1.00567	0.76267				0.858332	0.700094	1.00567	0.76267	1.3888	0.452173
0.829519	0.739802	1.4171	0.455128		0.407948	0.666667	0.829519	0.739802		0.864054	1.26907	0.998689	0.601328	0.829519	0.739802		2.18572		1.2761	1.19064	1.01133	0.78698				0.86451	0.701615	1.01133	0.78698	1.4171	0.455128
0.830841	0.789915	1.42436	0.458787		0.41035	0.677733	0.830841	0.789915		0.878672	1.32881	1.01088	0.603582	0.830841	0.789915		2.23122		1.29073	1.19517	1.02345	0.814313				0.877671	0.7095	1.02345	0.814313	1.42436	0.458787
0.842833	0.799344	1.42815	0.458916		0.41667	0.687326	0.842833	0.799344		0.880632	1.34827	1.01394	0.611331	0.842833	0.799344		2.56489		1.31308	1.19557	1.02494	0.818541				0.890815	0.711952	1.02494	0.818541	1.42815	0.458916
0.865346	0.815192	1.44556	0.45994		0.435552	0.692172	0.865346	0.815192		0.884803	1.36132	1.03581	0.681814	0.865346	0.815192		2.68171		1.33169	1.19768	1.03259	0.825436				0.910379	0.71259	1.03259	0.825436	1.44556	0.45994
0.876959	0.821075	1.44911	0.46068		0.443597	0.710355	0.876959	0.821075		0.886365	1.3616	1.04165	0.682051	0.876959	0.821075				1.35292	1.20137	1.03329	0.843228				0.915499	0.717544	1.03329	0.843228	1.44911	0.46068
0.887913	0.821188	1.51143	0.46243		0.445838	0.71389	0.887913	0.821188		0.89901	1.38231	1.04921	0.68215	0.887913	0.821188				1.39417	1.20831	1.03332	0.844614				0.919492	0.720066	1.03332	0.844614	1.51143	0.46243
0.902849	0.823385	1.52864	0.466474		0.449745	0.719992	0.902849	0.823385		0.909814	1.40524	1.107	0.697654	0.902849	0.823385				1.39878	1.2146	1.04098	0.845163				0.924981	0.721829	1.04098	0.845163	1.52864	0.466474
0.911658	0.824626	1.56859	0.470188		0.456115	0.723964	0.911658	0.824626		0.914524	1.43955	1.18946	0.702392	0.911658	0.824626				1.42466	1.21653	1.04231	0.855608				0.927264	0.726361	1.04231	0.855608	1.56859	0.470188
0.916982	0.835259	1.63136	0.474968		0.4606	0.727761	0.916982	0.835259		0.922798	1.44771	1.19075	0.713682	0.916982	0.835259				1.43886	1.22976	1.05661	0.860224				0.930796	0.732515	1.05661	0.860224	1.63136	0.474968
0.933377	0.847589	1.96131	0.484687		0.46758	0.736009	0.933377	0.847589		0.923918	1.56141	1.19373	0.714114	0.933377	0.847589				1.52821	1.2332	1.06644	0.868353				0.941056	0.735941	1.06644	0.868353	1.96131	0.484687
0.935329	0.853672	0.41841	0.491539		0.469335	0.741591	0.935329	0.853672		0.932598	1.56216	1.39646	0.717215	0.935329	0.853672				1.60327	1.23366	1.0712	0.869867				0.942646	0.745626	1.0712	0.869867	0.41841	0.491539
0.95566	0.855327	0.444525	0.493734		0.470623	0.74206	0.95566	0.855327		0.943054	1.5658	1.44476	0.732198	0.95566	0.855327				1.68587	1.23704	1.07121	0.872173				0.946021	0.751434	1.07121	0.872173	0.444525	0.493734
0.957066	0.876751	0.477955	0.498125		0.483866	0.761435	0.957066	0.876751		0.9557	1.7627	0.434752	0.749992	0.957066	0.876751				0.797832	1.24032	1.08306	0.876338				0.952367	0.753737	1.08306	0.876338	0.477955	0.498125
0.981607	0.895881	0.515811	0.50263		0.494204	0.76265	0.981607	0.895881		0.957266	1.81501	0.435724	0.754433	0.981607	0.895881				0.817318	1.24299	1.09154	0.886333				0.958958	0.766751	1.09154	0.886333	0.515811	0.50263
0.984296	0.900965	0.542473	0.504781		0.501302	0.766973	0.984296	0.900965		0.9805	2.52881	0.467351	0.756768	0.984296	0.900965				0.867853	1.24391	1.09314	0.901569				0.977217	0.767329	1.09314	0.901569	0.542473	0.504781
0.984583	0.91169	0.556214	0.506886		0.522656	0.782388	0.984583	0.91169		0.982478	0.52636	0.47559	0.762036	0.984583	0.91169				0.869797	1.245	1.09817	0.904472				0.989091	0.772521	1.09817	0.904472	0.556214	0.506886
1.06589	0.912731	0.55874	0.508882		0.536368	0.800902	1.06589	0.912731		0.986231	0.530425	0.481066	0.764368	1.06589	0.912731				0.880518	1.24784	1.10391	0.90644				0.990214	0.785645	1.10391	0.90644	0.55874	0.508882
1.21233	0.914269	0.560355	0.512385		0.543657	0.80633	1.21233	0.914269		0.987122	0.564754	0.500421	0.774101	1.21233	0.914269				0.88515	1.24791	1.10545	0.910983				0.996864	0.794086	1.10545	0.910983	0.560355	0.512385
0.334887	0.922475	0.562853	0.513272		0.546586	0.807067	0.334887	0.922475		0.989609	0.578687	0.509413	0.782295	0.334887	0.922475				0.926011	1.2497	1.15115	0.924698				1.02915	0.797347	1.15115	0.924698	0.562853	0.513272
0.425575	0.926944	0.577277	0.51655		0.553192	0.80919	0.425575	0.926944		1.02109	0.613493	0.52071	0.78383	0.425575	0.926944				0.949709	1.25117	1.16073	0.937077				1.02959	0.806725	1.16073	0.937077	0.577277	0.51655
0.504022	0.934016	0.611645	0.518459		0.554314	0.809776	0.504022	0.934016		1.02427	0.622663	0.535532	0.79543	0.504022	0.934016				1.00803	1.25142	1.16606	0.939182				1.03035	0.81973	1.16606	0.939182	0.611645	0.518459
0.517661	0.936381	0.614196	0.518519		0.557913	0.822422	0.517661	0.936381		1.03084	0.663988	0.542383	0.796946	0.517661	0.936381				1.01039	1.25218	1.16867	0.943534				1.0358	0.825295	1.16867	0.943534	0.614196	0.518519
0.533134	0.964133	0.618661	0.520099		0.562265	0.826903	0.533134	0.964133		1.04504	0.665044	0.54786	0.798944	0.533134	0.964133				1.01904	1.2541	1.17592	0.959739				1.05226	0.825443	1.17592	0.959739	0.618661	0.520099
0.534109	0.975313	0.627322	0.521191		0.567026	0.831999	0.534109	0.975313		1.05163	0.672445	0.550327	0.807592	0.534109	0.975313				1.0209	1.25549	1.1766	0.96331				1.06324	0.833895	1.1766	0.96331	0.627322	0.521191
0.536114	0.982916	0.632912	0.530889		0.569931	0.835798	0.536114	0.982916		1.07475	0.674649	0.552094	0.808472	0.536114	0.982916				1.02942	1.26028	1.20462	0.97648				1.06681	0.840261	1.20462	0.97648	0.632912	0.530889
0.544949	1.00529	0.636215	0.534433		0.57115	0.843591	0.544949	1.00529		1.07985	0.687836	0.552685	0.809709	0.544949	1.00529				1.03342	1.26248	1.20821	0.981615				1.07989	0.848107	1.20821	0.981615	0.636215	0.534433
0.567642	1.00618	0.649493	0.540064		0.571635	0.843837	0.567642	1.00618		1.09736	0.692404	0.568277	0.809914	0.567642	1.00618				1.05014	1.26289	1.23634	1				1.0865	0.849106	1.23634	1	0.649493	0.540064
0.57089	1.01496	0.651718	0.541241		0.580906	0.844807	0.57089	1.01496		1.09757	0.713893	0.573456	0.818851	0.57089	1.01496				1.05249	1.27083	1.24653	1.00381				1.10734	0.855935	1.24653	1.00381	0.651718	0.541241
0.571	1.0162	0.652905	0.550694		0.581838	0.850173	0.571	1.0162		1.11226	0.716525	0.577042	0.821522	0.571	1.0162				1.05822	1.27267	1.24801	1.01589				1.11657	0.863014	1.24801	1.01589	0.652905	0.550694
0.583217	1.03632	0.667011	0.55268		0.583464	0.861715	0.583217	1.03632		1.11555	0.719123	0.581405	0.824289	0.583217	1.03632				1.0676	1.27341	1.2502	1.01804				1.12075	0.870013	1.2502	1.01804	0.667011	0.55268
0.595279	1.04051	0.676572	0.553538		0.585762	0.862907	0.595279	1.04051		1.1157	0.725726	0.583925	0.827082	0.595279	1.04051				1.08617	1.27606	1.26414	1.02201				1.12908	0.871627	1.26414	1.02201	0.676572	0.553538
0.599167	1.04224	0.677199	0.554086		0.589141	0.864162	0.599167	1.04224		1.12978	0.726008	0.586792	0.831264	0.599167	1.04224				1.10917	1.27841	1.28271	1.02732				1.13116	0.884742	1.28271	1.02732	0.677199	0.554086
0.618796	1.0598	0.677539	0.554311		0.591475	0.866093	0.618796	1.0598		1.13091	0.730904	0.587359	0.832481	0.618796	1.0598				1.11019	1.28214	1.28897	1.02772				1.13528	0.897573	1.28897	1.02772	0.677539	0.554311
0.622286	1.07991	0.678433	0.555031		0.592547	0.872017	0.622286	1.07991		1.14069	0.754472	0.596016	0.84228	0.622286	1.07991				1.11532	1.28425	1.29136	1.02898				1.14038	0.907255	1.29136	1.02898	0.678433	0.555031
0.625229	1.12263	0.681148	0.557323		0.596965	0.88634	0.625229	1.12263		1.27049	0.760036	0.601993	0.844649	0.625229	1.12263				1.12942	1.28532	1.29206	1.07999				1.14643	0.915779	1.29206	1.07999	0.681148	0.557323
0.629868	1.12623	0.686595	0.55823		0.599421	0.915108	0.629868	1.12623		1.28712	0.766424	0.606889	0.845412	0.629868	1.12623				1.13183	1.29066	1.31073	1.08761				1.15588	0.941234	1.31073	1.08761	0.686595	0.55823
0.635776	1.16233	0.686977	0.563327		0.599486	0.917739	0.635776	1.16233		1.33716	0.775037	0.61432	0.847599	0.635776	1.16233				1.15349	1.29095	1.32922	1.09926				1.15589	0.961127	1.32922	1.09926	0.686977	0.563327
0.636552	1.166	0.689044	0.5635		0.61245	0.92346	0.636552	1.166		1.37811	0.778503	0.617821	0.851726	0.636552	1.166				1.1617	1.29121	1.33895	1.13638				1.16718	0.980659	1.33895	1.13638	0.689044	0.5635
0.640605	1.21165	0.695504	0.569142		0.612679	0.951214	0.640605	1.21165		1.47171	0.782942	0.622158	0.85351	0.640605	1.21165				1.16425	1.29134	1.33987	1.17173				1.16735	1.03053	1.33987	1.17173	0.695504	0.569142
0.653103	1.22979	0.697085	0.571024		0.619155	0.951229	0.653103	1.22979		1.55222	0.795584	0.623833	0.856559	0.653103	1.22979				1.16872	1.293	1.34721	1.21913				1.17483	1.08687	1.34721	1.21913	0.697085	0.571024
0.660172	1.24086	0.698736	0.571978		0.621391	0.953073	0.660172	1.24086		1.55721	0.800239	0.623962	0.859452	0.660172	1.24086				1.1769	1.29498	1.34836	1.24628				1.18715	1.14552	1.34836	1.24628	0.698736	0.571978
0.663217	1.24252	0.699609	0.573301		0.622971	0.955815	0.663217	1.24252		1.67203	0.801099	0.627168	0.862036	0.663217	1.24252				1.20614	1.30464	1.35392	1.28204				1.18982	0.199045	1.35392	1.28204	0.699609	0.573301
0.674796	1.26104	0.701546	0.573333		0.63676	0.959554	0.674796	1.26104		1.76417	0.819211	0.631413	0.864244	0.674796	1.26104				1.20957	1.30598	1.357	1.37593				1.19338	0.334896	1.357	1.37593	0.701546	0.573333
0.686936	1.28014	0.701847	0.575516		0.642322	0.985596	0.686936	1.28014		0.462976	0.823105	0.641987	0.865832	0.686936	1.28014				1.21661	1.30776	1.36203	1.81795				1.20394	0.458116	1.36203	1.81795	0.701847	0.575516
0.688742	1.2889	0.704114	0.578598		0.644838	0.988962	0.688742	1.2889		0.493954	0.826389	0.642397	0.871783	0.688742	1.2889				1.21897	1.30825	1.36277	1.95344				1.20593	0.458715	1.36277	1.95344	0.704114	0.578598
0.691463	1.2985	0.708928	0.579312		0.650007	0.99758	0.691463	1.2985		0.506528	0.832483	0.642759	0.876196	0.691463	1.2985				1.21991	1.3085	1.37195	2.40056				1.2212	0.46925	1.37195	2.40056	0.708928	0.579312
0.695415	1.30871	0.710584	0.583151		0.652667	1.01436	0.695415	1.30871		0.506937	0.857589	0.649118	0.880152	0.695415	1.30871				1.2322	1.30869	1.38564	0.803174				1.23737	0.472817	1.38564	0.803174	0.710584	0.583151
0.715937	1.3188	0.716026	0.583905		0.656423	1.02182	0.715937	1.3188		0.515977	0.858546	0.659449	0.884356	0.715937	1.3188				1.2423	1.31011	1.40092	1.06363				1.28724	0.485402	1.40092	1.06363	0.716026	0.583905
0.720409	1.31917	0.718544	0.584455		0.658682	1.02749	0.720409	1.31917		0.524083	0.860448	0.661972	0.911289	0.720409	1.31917				1.24805	1.31156	1.40601	1.31208				1.29449	0.507265	1.40601	1.31208	0.718544	0.584455
0.726039	1.34714	0.721932	0.585524		0.659525	1.0434	0.726039	1.34714		0.529744	0.864987	0.66253	0.918483	0.726039	1.34714				1.28251	1.3128	1.40727	1.40201				1.29987	0.520496	1.40727	1.40201	0.721932	0.585524
0.729034	1.34846	0.722802	0.586939		0.676845	1.05393	0.729034	1.34846		0.555886	0.879128	0.662684	0.921542	0.729034	1.34846				1.30629	1.31541	1.42744	1.42738				1.31201	0.52695	1.42744	1.42738	0.722802	0.586939
0.731816	1.34991	0.723376	0.588299		0.677044	1.07783	0.731816	1.34991		0.561017	0.880265	0.66299	0.925324	0.731816	1.34991				1.32154	1.31903	1.45488	1.51122				1.31834	0.530483	1.45488	1.51122	0.723376	0.588299
0.732075	1.36721	0.723894	0.590016		0.677856	1.11541	0.732075	1.36721		0.586592	0.888908	0.671168	0.925746	0.732075	1.36721				1.35183	1.31924	1.45568					1.35041	0.532739	1.45568		0.723894	0.590016
0.73336	1.37119	0.727492	0.59003		0.685927	1.11625	0.73336	1.37119		0.590844	0.893749	0.671204	0.926751	0.73336	1.37119				1.35868	1.32001	1.48522					1.36477	0.542176	1.48522		0.727492	0.59003
0.734226	1.37319	0.72963	0.596125		0.686042	1.11767	0.734226	1.37319		0.590859	0.896806	0.673582	0.930691	0.734226	1.37319				1.37218	1.32161	1.48822					1.40123	0.555007	1.48822		0.72963	0.596125
0.741632	1.41849	0.738978	0.596904		0.692059	1.1232	0.741632	1.41849		0.597843	0.900126	0.682014	0.933936	0.741632	1.41849				1.38725	1.32886	1.49638					1.41098	0.569002	1.49638		0.738978	0.596904
0.74723	1.45472	0.740341	0.597092		0.69332	1.15125	0.74723	1.45472		0.602781	0.924123	0.68416	0.935425	0.74723	1.45472				1.44046	1.33018	1.498					1.41497	0.575234	1.498		0.740341	0.597092
0.752199	1.46279	0.747309	0.597339		0.694585	0.433827	0.752199	1.46279		0.607403	0.930871	0.69247	0.943438	0.752199	1.46279				1.46067	1.33144	1.50569					1.43948	0.582348	1.50569		0.747309	0.597339
0.759099	1.47043	0.752195	0.597563		0.696451	0.436432	0.759099	1.47043		0.607539	0.931361	0.693585	0.946585	0.759099	1.47043				1.49553	1.33771	1.52801					1.45411	0.583231	1.52801		0.752195	0.597563
0.760762	1.50349	0.759561	0.598621		0.704931	0.446633	0.760762	1.50349		0.614244	0.937101	0.702852	0.94992	0.760762	1.50349				1.49793	1.33819	1.53835					1.46386	0.583704	1.53835		0.759561	0.598621
0.768595	1.53488	0.761055	0.598998		0.70553	0.466034	0.768595	1.53488		0.619096	0.938799	0.704505	0.95325	0.768595	1.53488				1.51417	1.33948	1.54055					1.47141	0.585261	1.54055		0.761055	0.598998
0.770467	1.73253	0.763737	0.600011		0.710974	0.47106	0.770467	1.73253		0.62616	0.950387	0.704775	0.962165	0.770467	1.73253				1.52089	1.3402	1.54311					1.47548	0.598388	1.54311		0.763737	0.600011
0.774326	1.76083	0.770418	0.60073		0.712926	0.563182	0.774326	1.76083		0.641102	0.957624	0.709577	0.96791	0.774326	1.76083				1.64774	1.34089	1.55474					1.48113	0.61049	1.55474		0.770418	0.60073
0.776608	2.02807	0.773914	0.600904		0.715112	0.56839	0.776608	2.02807		0.644992	0.960533	0.710691	0.972336	0.776608	2.02807				1.79873	1.34111	1.55719					1.51559	0.612792	1.55719		0.773914	0.600904
0.782265	2.21981	0.774566	0.60307		0.716077	0.609869	0.782265	2.21981		0.669194	0.979502	0.716365	0.976832	0.782265	2.21981					1.34649	1.56055					1.54509	0.622582	1.56055		0.774566	0.60307
0.791788	2.33239	0.777909	0.603179		0.717709	0.616177	0.791788	2.33239		0.674429	0.986119	0.726809	0.979474	0.791788	2.33239					1.34737	1.5959					1.6013	0.623021	1.5959		0.777909	0.603179
0.798604		0.793667	0.603929		0.721298	0.624113	0.798604			0.677609	0.995722	0.727363	0.980302	0.798604						1.34755	1.60159					1.62741	0.624179	1.60159		0.793667	0.603929
0.798696		0.794515	0.605296		0.728834	0.624948	0.798696			0.677979	1	0.732547	0.984464	0.798696						1.34768	1.6228					1.64362	0.625265	1.6228		0.794515	0.605296
0.799558		0.795451	0.605633		0.731411	0.631386	0.799558			0.678268	1.00051	0.73552	0.985034	0.799558						1.34846	1.69711					1.68373	0.626032	1.69711		0.795451	0.605633
0.818927		0.79643	0.605897		0.736725	0.637631	0.818927			0.689844	1.00567	0.740947	0.985807	0.818927						1.35063	1.73807					1.81514	0.628021	1.73807		0.79643	0.605897
0.831357		0.797207	0.606553		0.74796	0.638029	0.831357			0.690756	1.00805	0.741834	0.985902	0.831357						1.35195	1.79146					1.9294	0.649494	1.79146		0.797207	0.606553
0.846327		0.809781	0.608003		0.7541	0.648633	0.846327			0.691244	1.00924	0.742342	0.990002	0.846327						1.35212	1.84317					0.451537	0.657403	1.84317		0.809781	0.608003
0.857783		0.809812	0.61024		0.756316	0.654948	0.857783			0.69365	1.0276	0.742529	0.994531	0.857783						1.35689	1.93063					0.626716	0.663529	1.93063		0.809812	0.61024
0.859482		0.811571	0.610273		0.768816	0.6575	0.859482			0.693888	1.02903	0.749685	0.996952	0.859482						1.35861	1.94101					0.647584	0.668428	1.94101		0.811571	0.610273
0.859811		0.812032	0.61174		0.790952	0.658257	0.859811			0.694424	1.04407	0.76048	0.997653	0.859811						1.36218	1.9478					0.648783	0.670392	1.9478		0.812032	0.61174
0.861898		0.812789	0.612937		0.794619	0.665169	0.861898			0.700606	1.0473	0.76266	0.998336	0.861898						1.3628	2.01874					0.652795	0.672786	2.01874		0.812789	0.612937
0.862946		0.813337	0.613526		0.799822	0.666132	0.862946			0.707714	1.04755	0.764946	1	0.862946						1.36535	2.04572					0.661109	0.675286	2.04572		0.813337	0.613526
0.873999		0.817066	0.615043		0.803114	0.667621	0.873999			0.708592	1.0508	0.768784	1.0133	0.873999						1.36643	2.09241					0.680562	0.677255	2.09241		0.817066	0.615043
0.879089		0.824994	0.617392		0.810418	0.66831	0.879089			0.711425	1.05236	0.770218	1.01478	0.879089						1.36905	2.5306					0.682745	0.682974	2.5306		0.824994	0.617392
0.882592		0.832389	0.619886		0.814689	0.671693	0.882592			0.7122	1.05484	0.772571	1.01649	0.882592						1.37241	0.670819					0.686736	0.691197	0.670819		0.832389	0.619886
0.88667		0.832514	0.620843		0.815609	0.67867	0.88667			0.712571	1.07023	0.773348	1.01677	0.88667						1.37386	0.865118					0.708905	0.69496	0.865118		0.832514	0.620843
0.887344		0.838134	0.621208		0.817407	0.680013	0.887344			0.718105	1.0789	0.787792	1.02334	0.887344						1.37562	0.965048					0.712723	0.695121	0.965048		0.838134	0.621208
0.913265		0.838154	0.621816		0.822727	0.689394	0.913265			0.726348	1.08279	0.791212	1.02529	0.913265						1.37729	1.06425					0.715258	0.698973	1.06425		0.838154	0.621816
0.929679		0.838715	0.622033		0.844182	0.693573	0.929679			0.730268	1.08974	0.793148	1.02559	0.929679						1.37781	1.30758					0.742539	0.716421	1.30758		0.838715	0.622033
0.930488		0.841845	0.622463		0.849912	0.694014	0.930488			0.733863	1.11902	0.794208	1.04488	0.930488						1.37926						0.753105	0.718655			0.841845	0.622463
0.939329		0.844569	0.62267		0.866407	0.704367	0.939329			0.735557	1.15536	0.795991	1.04718	0.939329						1.3794						0.754218	0.720185			0.844569	0.62267
0.940033		0.846293	0.624076		0.896591	0.704964	0.940033			0.735608	1.15782	0.808534	1.04755	0.940033						1.38061						0.786428	0.722981			0.846293	0.624076
0.942212		0.847461	0.625752		0.903998	0.707654	0.942212			0.738428	1.16278	0.811435	1.05339	0.942212						1.3812						0.801321	0.725877			0.847461	0.625752
0.953676		0.848236	0.625849		0.9047	0.708349	0.953676			0.74388	1.1692	0.816491	1.06225	0.953676						1.38194						0.804544	0.728095			0.848236	0.625849
0.966247		0.848833	0.626199		0.910536	0.71018	0.966247			0.745203	1.20586	0.820954	1.0729	0.966247						1.38247						0.808787	0.731292			0.848833	0.626199
0.968887		0.849848	0.631363		0.930582	0.71201	0.968887			0.753829	1.22755	0.826683	1.0965	0.968887						1.38399						0.815421	0.735781			0.849848	0.631363
0.999493		0.851834	0.63238		0.93092	0.720858	0.999493			0.75478	1.23572	0.829661	1.10185	0.999493						1.3883						0.818927	0.735913			0.851834	0.63238
1.00552		0.854704	0.633543		0.933031	0.721144	1.00552			0.761394	1.27832	0.853337	1.10547	1.00552						1.38855						0.82171	0.736088			0.854704	0.633543
1.00734		0.858571	0.634597		0.942656	0.722314	1.00734			0.761824	1.28792	0.862068	1.11163	1.00734						1.39864						0.824595	0.740591			0.858571	0.634597
1.01553		0.858625	0.634689		0.946705	0.729325	1.01553			0.761996	1.30516	0.863743	1.12866	1.01553						1.41596						0.830098	0.744169			0.858625	0.634689
1.11547		0.860244	0.636516		1.02669	0.73877	1.11547			0.768359	1.30584	0.874728	1.12901	1.11547						1.41832						0.836091	0.7495			0.860244	0.636516
1.20995		0.861763	0.63862		1.03246	0.746748	1.20995			0.770342	1.31235	0.881269	1.14083	1.20995						1.42253						0.845181	0.7535			0.861763	0.63862
1.26529		0.863625	0.639892		1.09201	0.74752	1.26529			0.780111	1.31373	0.885332	1.14798	1.26529						1.42284						0.850078	0.757787			0.863625	0.639892
1.4157		0.865567	0.640138		1.15833	0.764688	1.4157			0.787863	1.34304	0.886558	1.17753	1.4157						1.42349						0.851889	0.759279			0.865567	0.640138
1.42863		0.865575	0.641118		1.17237	0.774656	1.42863			0.792958	1.35364	0.889063	1.17901	1.42863						1.42376						0.852853	0.768409			0.865575	0.641118
1.44549		0.867331	0.64192		1.17263	0.782801	1.44549			0.797074	1.35755	0.891891	1.18157	1.44549						1.42444						0.853604	0.774393			0.867331	0.64192
1.52217		0.868236	0.642592		0.296044	0.783227	1.52217			0.797312	1.35888	0.897246	1.2023	1.52217						1.42685						0.855974	0.778722			0.868236	0.642592
		0.868275	0.644198		0.351588	0.784559				0.798824	1.37119	0.902871	1.23331							1.42721						0.85974	0.780118			0.868275	0.644198
		0.871051	0.64436		0.361952	0.784803				0.803253	1.49511	0.911038	1.24294							1.42946						0.8642	0.78202			0.871051	0.64436
		0.871952	0.646576		0.368652	0.788591				0.80541	1.51613	0.915002	1.28764							1.43032						0.869795	0.789467			0.871952	0.646576
		0.872696	0.647981		0.370044	0.789593				0.808723	1.69975	0.924553	1.44444							1.43337						0.876011	0.791532			0.872696	0.647981
		0.873017	0.648046		0.371381	0.791872				0.820064	1.77174	0.925887	1.47581							1.43763						0.876242	0.7953			0.873017	0.648046
		0.873335	0.648838		0.380431	0.795597				0.823112	2.16899	0.936234	1.58357							1.4415						0.876672	0.803626			0.873335	0.648838
		0.874737	0.650491		0.385419	0.799781				0.826089		0.945165	0.492798							1.44252						0.883396	0.807082			0.874737	0.650491
		0.875904	0.650661		0.39385	0.803286				0.82838		0.949531	0.598057							1.44732						0.887508	0.810127			0.875904	0.650661
		0.877254	0.65137		0.397932	0.803486				0.828849		0.962476	0.664185							1.45157						0.908027	0.81248			0.877254	0.65137
		0.878391	0.651612		0.398168	0.806673				0.829352		0.965584	0.680507							1.45178						0.910577	0.823266			0.878391	0.651612
		0.880993	0.65253		0.403943	0.813922				0.829843		0.966632	0.709386							1.45283						0.915239	0.827779			0.880993	0.65253
		0.882867	0.654927		0.407401	0.815904				0.833652		0.9714	0.713957							1.45301						0.930877	0.836055			0.882867	0.654927
		0.884388	0.656543		0.425342	0.816821				0.841173		0.977015	0.726574							1.46862						0.931176	0.843609			0.884388	0.656543
		0.884881	0.657161		0.428056	0.818287				0.841631		1.00386	0.744895							1.47606						0.934014	0.84446			0.884881	0.657161
		0.885105	0.658068		0.429921	0.820775				0.843882		1.0205	0.754233							1.4846						0.936314	0.846979			0.885105	0.658068
		0.891809	0.659283		0.444304	0.821372				0.848006		1.02185	0.789809							1.48817						0.939942	0.854277			0.891809	0.659283
		0.892101	0.660003		0.455793	0.823234				0.848382		1.023	0.799561							1.49058						0.9436	0.8549			0.892101	0.660003
		0.892119	0.661495		0.457245	0.826995				0.848768		1.06016	0.802262							1.49739						0.968212	0.855264			0.892119	0.661495
		0.89245	0.661763		0.458385	0.828545				0.848819		1.06785	0.810604							1.49803						0.96941	0.856316			0.89245	0.661763
		0.895748	0.662242		0.466885	0.833546				0.850881		1.07277	0.818493							1.50275						0.971597	0.85861			0.895748	0.662242
		0.89789	0.662547		0.468047	0.833587				0.853709		1.10267	0.822145							1.5033						0.972038	0.862105			0.89789	0.662547
		0.89847	0.664424		0.479869	0.837879				0.854474		1.10579	0.846494							1.50663						0.979303	0.870335			0.89847	0.664424
		0.901709	0.665999		0.492476	0.841992				0.855515		1.10764	0.850076							1.51263						0.981165	0.875337			0.901709	0.665999
		0.901805	0.668591		0.498784	0.842568				0.866676		1.15804	0.86061							1.51287						0.983368	0.879116			0.901805	0.668591
		0.909447	0.668727		0.50428	0.843255				0.867442		1.17145	0.936794							1.51391						0.986593	0.890637			0.909447	0.668727
		0.910022	0.670614		0.516848	0.845115				0.874889		1.17948	0.968755							1.53003						0.996008	0.891421			0.910022	0.670614
		0.910882	0.675156		0.519626	0.846967				0.879744		1.20729	0.97801							1.53348						0.998271	0.896706			0.910882	0.675156
		0.913569	0.676281		0.519879	0.851				0.884066		1.2482	0.530902							1.5381						1.02592	0.928263			0.913569	0.676281
		0.914275	0.676957		0.519913	0.855999				0.887148		1.27728	0.539389							1.53923						1.05577	0.943117			0.914275	0.676957
		0.917941	0.679156		0.521867	0.8624				0.887633		0.341498	0.574929							1.54918						1.06093	0.943232			0.917941	0.679156
		0.921252	0.679182		0.524366	0.866321				0.897982		0.418621	0.618634							1.55055						1.07002	0.947386			0.921252	0.679182
		0.923205	0.679715		0.531831	0.86808				0.899569		0.437476	0.635652							1.55765						1.07089	0.965093			0.923205	0.679715
		0.923476	0.680652		0.542012	0.87113				0.913609		0.465535	0.637861							1.56543						1.08351	0.965683			0.923476	0.680652
		0.924964	0.6857		0.546301	0.875998				0.929195		0.484768	0.697							1.57017						1.08455	1.00538			0.924964	0.6857
		0.925274	0.687136		0.548509	0.879016				0.935199		0.486129	0.701362							1.58576						1.10035	1.0088			0.925274	0.687136
		0.925534	0.687739		0.549003	0.88187				0.939209		0.52923	0.711105							1.5861						1.10633	1.0179			0.925534	0.687739
		0.926889	0.689046		0.558019	0.882357				0.963605		0.53295	0.711973							1.59385						1.10881	1.02151			0.926889	0.689046
		0.92693	0.691925		0.562868	0.886433				0.965568		0.544786	0.721375							1.59867						1.11195	1.03599			0.92693	0.691925
		0.928361	0.695718		0.563128	0.88667				0.96572		0.556326	0.734854							1.60701						1.11488	1.03695			0.928361	0.695718
		0.928491	0.696563		0.567846	0.899664				0.968109		0.5715	0.735687							1.62253						1.11572	1.05			0.928491	0.696563
		0.929331	0.698256		0.570345	0.906716				0.980973		0.575344	0.749985							1.6241						1.1253	1.09047			0.929331	0.698256
		0.931721	0.699306		0.570623	0.909937				0.994704		0.57666	0.761902							1.63794						1.13553	1.09358			0.931721	0.699306
		0.932523	0.699827		0.57162	0.912066				0.997122		0.584599	0.795171							1.64851						1.15575	1.12134			0.932523	0.699827
		0.933279	0.700512		0.572588	0.928559				1		0.593906	0.800324							1.68088						1.15754	1.44211			0.933279	0.700512
		0.933706	0.700549		0.573938	0.933003				1.01317		0.596647	0.808942							1.68387						1.1665				0.933706	0.700549
		0.934981	0.703362		0.574618	0.940848				1.05485		0.602827	0.818857							1.69184						1.17038				0.934981	0.703362
		0.935248	0.70374		0.582994	0.955095				1.09204		0.606833	0.829934							1.69217						1.17309				0.935248	0.70374
		0.937907	0.704515		0.595334	0.955519				1.09431		0.612135	0.841949							1.69486						1.17399				0.937907	0.704515
		0.938259	0.705626		0.596197	0.955797				1.12938		0.615159	0.850446							1.6976						1.20101				0.938259	0.705626
		0.939067	0.70612		0.596814	0.961094				1.15248		0.623625	0.864236							1.69838						1.22931				0.939067	0.70612
		0.939813	0.706388		0.600707	0.996373				1.21605		0.624581	0.864342							1.70186						1.2349				0.939813	0.706388
		0.941632	0.707451		0.606526	0.997361				1.21982		0.633314	0.874186							1.70253						1.2384				0.941632	0.707451
		0.94463	0.707938		0.613609	1.00725				1.23028		0.641268	0.876758							1.70361						1.25056				0.94463	0.707938
		0.947627	0.708754		0.621477	1.0176				1.27478		0.64353	0.877597							1.70562						1.26179				0.947627	0.708754
		0.94769	0.709082		0.622005	1.01924				1.57248		0.647145	0.889441							1.72107						1.26657				0.94769	0.709082
		0.94788	0.709602		0.622261	1.02039						0.652772	0.891672							1.72504						1.26755				0.94788	0.709602
		0.950869	0.711562		0.624442	1.0437						0.658304	0.900729							1.72539						1.27114				0.950869	0.711562
		0.955057	0.713519		0.624703	1.07564						0.658913	0.901933							1.74862						1.28011				0.955057	0.713519
		0.961091	0.714283		0.630352	1.07873						0.673021	0.903536							1.76443						1.28764				0.961091	0.714283
		0.963946	0.714543		0.63215	1.10621						0.676796	0.923669							1.76451						1.33602				0.963946	0.714543
		0.964543	0.714989		0.633536	1.13543						0.678504	0.925351							1.77494						1.34341				0.964543	0.714989
		0.965168	0.715867		0.6355	1.13933						0.681512	0.926403							1.78511						1.34965				0.965168	0.715867
		0.966811	0.716357		0.635774	1.20073						0.685605	0.926808							1.83044						1.35221				0.966811	0.716357
		0.968009	0.717106		0.638366	1.22085						0.688478	0.9357							1.85965						1.36574				0.968009	0.717106
		0.969641	0.719072		0.639254	1.31489						0.692659	0.938656							1.86158						1.36946				0.969641	0.719072
		0.969961	0.719664		0.640061	1.31884						0.696048	0.947693							1.87632						1.39462				0.969961	0.719664
		0.970774	0.721885		0.646143	1.38966						0.700434	0.952193							1.87931						1.40931				0.970774	0.721885
		0.971323	0.721939		0.649204							0.707812	0.956396							1.88768						1.47122				0.971323	0.721939
		0.971929	0.723502		0.650134							0.715351	0.956398							1.8941						1.58314				0.971929	0.723502
		0.972123	0.7244		0.652923							0.715786	0.963136							1.92361						1.58824				0.972123	0.7244
		0.974028	0.724916		0.654075							0.720136	0.963595							1.93704						1.61875				0.974028	0.724916
		0.974153	0.731345		0.657172							0.720585	0.964881							1.95617						1.64109				0.974153	0.731345
		0.978736	0.732374		0.660735							0.725859	0.967593							1.95893						1.74564				0.978736	0.732374
		0.981506	0.732944		0.661458							0.725911	0.967729							1.96121						1.77066				0.981506	0.732944
		0.982245	0.733688		0.663078							0.732175	0.971049							1.96289						1.82807				0.982245	0.733688
		0.982297	0.734204		0.667634							0.734973	0.971183							2.00363						1.87705				0.982297	0.734204
		0.982544	0.734917		0.66787							0.735514	0.977349							2.04388						2.1698				0.982544	0.734917
		0.983541	0.737153		0.67091							0.739054	0.985134							2.05748						2.39003				0.983541	0.737153
		0.98556	0.741584		0.685929							0.741404	0.98794							2.06259										0.98556	0.741584
		0.987915	0.743038		0.687604							0.744075	0.989298							2.06363										0.987915	0.743038
		0.988523	0.743877		0.690187							0.748785	0.991454							2.10443										0.988523	0.743877
		0.990271	0.74441		0.690253							0.750205	0.991919							2.10462										0.990271	0.74441
		0.992338	0.745043		0.69116							0.758759	1.0013							2.10601										0.992338	0.745043
		0.992686	0.745136		0.692875							0.758785	1.00337							2.10944										0.992686	0.745136
		0.996096	0.746314		0.692924							0.764416	1.01146							2.15444										0.996096	0.746314
		0.996492	0.748338		0.702191							0.768451	1.01433							2.1553										0.996492	0.748338
		1	0.749215		0.706791							0.768488	1.01568							2.15643										1	0.749215
		1	0.750006		0.709863							0.772208	1.01672							2.16162										1	0.750006
		1.00323	0.750632		0.714483							0.772948	1.01751							2.16295										1.00323	0.750632
		1.00725	0.751299		0.720025							0.788923	1.01853							2.1861										1.00725	0.751299
		1.01181	0.751542		0.72439							0.799996	1.02453							2.31576										1.01181	0.751542
		1.01186	0.753722		0.734255							0.803819	1.03313							2.34853										1.01186	0.753722
		1.0134	0.75529		0.742171							0.80877	1.0377							2.35002										1.0134	0.75529
		1.01402	0.755981		0.744997							0.811195	1.04265							2.37333										1.01402	0.755981
		1.01592	0.757352		0.746							0.812324	1.06514							2.43682										1.01592	0.757352
		1.01597	0.759175		0.747812							0.818403	1.06757							2.45062										1.01597	0.759175
		1.01643	0.759421		0.749059							0.822913	1.06929							2.48808										1.01643	0.759421
		1.01667	0.76007		0.758256							0.826566	1.06984							2.52569										1.01667	0.76007
		1.01694	0.760942		0.771983							0.837238	1.07196							2.59122										1.01694	0.760942
		1.02109	0.761929		0.772885							0.841247	1.08588							2.68784										1.02109	0.761929
		1.02279	0.762913		0.773247							0.845751	1.0869																	1.02279	0.762913
		1.02284	0.764951		0.77871							0.850921	1.08798																	1.02284	0.764951
		1.02605	0.765427		0.779048							0.85677	1.10021																	1.02605	0.765427
		1.02633	0.767988		0.780437							0.857447	1.12195																	1.02633	0.767988
		1.02634	0.769784		0.783223							0.859795	1.1392																	1.02634	0.769784
		1.02689	0.769801		0.785609							0.877197	1.18377																	1.02689	0.769801
		1.0279	0.770528		0.789375							0.883958	1.19938																	1.0279	0.770528
		1.03101	0.775061		0.794064							0.885214	1.2																	1.03101	0.775061
		1.03182	0.778836		0.796113							0.897253	1.20833																	1.03182	0.778836
		1.03473	0.778968		0.799774							0.89928	1.24507																	1.03473	0.778968
		1.03473	0.780552		0.80142							0.901303	1.24585																	1.03473	0.780552
		1.03589	0.781685		0.801932							0.904903	1.2538																	1.03589	0.781685
		1.03593	0.781922		0.805774							0.908019	1.26628																	1.03593	0.781922
		1.03734	0.782754		0.810094							0.911187	1.27389																	1.03734	0.782754
		1.04018	0.783056		0.837846							0.913818	1.2901																	1.04018	0.783056
		1.04128	0.784546		0.843891							0.91873	1.29296																	1.04128	0.784546
		1.04152	0.786213		0.929277							0.919957	1.29371																	1.04152	0.786213
		1.04268	0.786387		0.934563							0.928759	1.3002																	1.04268	0.786387
		1.04549	0.7869		0.965728							0.936323	1.36882																	1.04549	0.7869
		1.04902	0.786967		1.00371							0.939874	1.47457																	1.04902	0.786967
		1.04999	0.787342		1.03152							0.9405																		1.04999	0.787342
		1.05057	0.78978		1.21955							0.957281																		1.05057	0.78978
		1.05264	0.79142									0.960895																		1.05264	0.79142
		1.05421	0.792668									0.966454																		1.05421	0.792668
		1.05611	0.793076									0.975392																		1.05611	0.793076
		1.05692	0.796113									0.981562																		1.05692	0.796113
		1.05846	0.79648									0.987647																		1.05846	0.79648
		1.05856	0.798505									1.0009																		1.05856	0.798505
		1.06088	0.798564									1.00465																		1.06088	0.798564
		1.06165	0.800321									1.02193																		1.06165	0.800321
		1.06208	0.800845									1.05393																		1.06208	0.800845
		1.06277	0.801951									1.05936																		1.06277	0.801951
		1.06674	0.803008									1.07373																		1.06674	0.803008
		1.06933	0.804832									1.09093																		1.06933	0.804832
		1.07611	0.809533									1.09546																		1.07611	0.809533
		1.07713	0.809793									1.0967																		1.07713	0.809793
		1.07834	0.812654									1.11502																		1.07834	0.812654
		1.08007	0.816085									1.13597																		1.08007	0.816085
		1.08032	0.818692									1.15526																		1.08032	0.818692
		1.08254	0.818962									1.23978																		1.08254	0.818962
		1.08612	0.820065									1.32868																		1.08612	0.820065
		1.08616	0.820157									1.5352																		1.08616	0.820157
		1.08646	0.821311																											1.08646	0.821311
		1.08705	0.821424																											1.08705	0.821424
		1.09043	0.821819																											1.09043	0.821819
		1.09499	0.822221																											1.09499	0.822221
		1.0971	0.826147																											1.0971	0.826147
		1.09769	0.826379																											1.09769	0.826379
		1.09773	0.828395																											1.09773	0.828395
		1.09945	0.833342																											1.09945	0.833342
		1.10153	0.833844																											1.10153	0.833844
		1.10365	0.834564																											1.10365	0.834564
		1.10427	0.839586																											1.10427	0.839586
		1.10439	0.84645																											1.10439	0.84645
		1.10632	0.846726																											1.10632	0.846726
		1.10774	0.848609																											1.10774	0.848609
		1.10781	0.852757																											1.10781	0.852757
		1.1079	0.854036																											1.1079	0.854036
		1.10827	0.857696																											1.10827	0.857696
		1.10991	0.859219																											1.10991	0.859219
		1.11112	0.861543																											1.11112	0.861543
		1.12049	0.863083																											1.12049	0.863083
		1.12073	0.863978																											1.12073	0.863978
		1.12447	0.872646																											1.12447	0.872646
		1.12546	0.875952																											1.12546	0.875952
		1.12704	0.878158																											1.12704	0.878158
		1.12873	0.890083																											1.12873	0.890083
		1.12874	0.891573																											1.12874	0.891573
		1.12895	0.89447																											1.12895	0.89447
		1.13213	0.905502																											1.13213	0.905502
		1.13258	0.906399																											1.13258	0.906399
		1.13689	0.907317																											1.13689	0.907317
		1.1434	0.907498																											1.1434	0.907498
		1.14519	0.915202																											1.14519	0.915202
		1.14907	0.920133																											1.14907	0.920133
		1.15315	0.922957																											1.15315	0.922957
		1.15625	0.92512																											1.15625	0.92512
		1.16977	0.925179																											1.16977	0.925179
		1.17067	0.927181																											1.17067	0.927181
		1.17113	0.927499																											1.17113	0.927499
		1.17433	0.928646																											1.17433	0.928646
		1.17638	0.930892																											1.17638	0.930892
		1.17655	0.935966																											1.17655	0.935966
		1.18091	0.939752																											1.18091	0.939752
		1.18603	0.948675																											1.18603	0.948675
		1.18864	0.952368																											1.18864	0.952368
		1.20821	0.953514																											1.20821	0.953514
		1.2089	0.956887																											1.2089	0.956887
		1.21465	0.961109																											1.21465	0.961109
		1.2176	0.967347																											1.2176	0.967347
		1.21957	0.9736																											1.21957	0.9736
		1.22007	0.975457																											1.22007	0.975457
		1.22116	0.991377																											1.22116	0.991377
		1.22198	0.992016																											1.22198	0.992016
		1.2291	1																											1.2291	1
		1.23352	1.00536																											1.23352	1.00536
		1.23507	1.00946																											1.23507	1.00946
		1.23566	1.01589																											1.23566	1.01589
		1.23929	1.01802																											1.23929	1.01802
		1.24474	1.02203																											1.24474	1.02203
		1.25036	1.02449																											1.25036	1.02449
		1.2566	1.0398																											1.2566	1.0398
		1.25736	1.11811																											1.25736	1.11811
		1.26215	1.17461																											1.26215	1.17461
		1.26282	1.39003																											1.26282	1.39003
		1.26317	0.415872																											1.26317	0.415872
		1.26634	0.490061																											1.26634	0.490061
		1.28017	0.510308																											1.28017	0.510308
		1.28026	0.518039																											1.28026	0.518039
		1.28201	0.520745																											1.28201	0.520745
		1.28248	0.533734																											1.28248	0.533734
		1.2837	0.534215																											1.2837	0.534215
		1.28635	0.548243																											1.28635	0.548243
		1.28715	0.559434																											1.28715	0.559434
		1.29502	0.560779																											1.29502	0.560779
		1.2962	0.564678																											1.2962	0.564678
		1.30161	0.570403																											1.30161	0.570403
		1.30641	0.585115																											1.30641	0.585115
		1.30754	0.592391																											1.30754	0.592391
		1.32541	0.596696																											1.32541	0.596696
		1.32813	0.597961																											1.32813	0.597961
		1.33356	0.600677																											1.33356	0.600677
		1.33618	0.601864																											1.33618	0.601864
		1.33641	0.607434																											1.33641	0.607434
		1.33887	0.608906																											1.33887	0.608906
		1.35689	0.612695																											1.35689	0.612695
		1.36311	0.616134																											1.36311	0.616134
		1.36943	0.620324																											1.36943	0.620324
		1.37622	0.621724																											1.37622	0.621724
		1.37816	0.626176																											1.37816	0.626176
		1.3786	0.62662																											1.3786	0.62662
		1.38005	0.627332																											1.38005	0.627332
		1.38455	0.629964																											1.38455	0.629964
		1.43378	0.640044																											1.43378	0.640044
		1.45202	0.655484																											1.45202	0.655484
		1.46181	0.658589																											1.46181	0.658589
		1.47376	0.660398																											1.47376	0.660398
		1.47625	0.661831																											1.47625	0.661831
		1.54202	0.663401																											1.54202	0.663401
		1.54905	0.673757																											1.54905	0.673757
		1.5841	0.67393																											1.5841	0.67393
		1.70882	0.676392																											1.70882	0.676392
		1.71958	0.677268																											1.71958	0.677268
		1.74142	0.682033																											1.74142	0.682033
		1.77579	0.690686																											1.77579	0.690686
		1.80542	0.695039																											1.80542	0.695039
		0.760525	0.705091																											0.760525	0.705091
		0.854699	0.707007																											0.854699	0.707007
		0.878361	0.709718																											0.878361	0.709718
		0.906642	0.734652																											0.906642	0.734652
		0.907459	0.757412																											0.907459	0.757412
		0.929259	0.778914																											0.929259	0.778914
		0.941749	0.782491																											0.941749	0.782491
		0.967145	0.782753																											0.967145	0.782753
		0.971567	0.784786																											0.971567	0.784786
		0.98026	0.795235																											0.98026	0.795235
		1.00712	0.816156																											1.00712	0.816156
		1.0075	0.818894																											1.0075	0.818894
		1.0091	0.822934																											1.0091	0.822934
		1.03381	0.827604																											1.03381	0.827604
		1.04588	0.833061																											1.04588	0.833061
		1.05026	0.833526																											1.05026	0.833526
		1.05083	0.837873																											1.05083	0.837873
		1.06164	0.847284																											1.06164	0.847284
		1.06282	0.850718																											1.06282	0.850718
		1.07351	0.851685																											1.07351	0.851685
		1.08903	0.867887																											1.08903	0.867887
		1.09872	0.868705																											1.09872	0.868705
		1.09984	0.874878																											1.09984	0.874878
		1.10043	0.879578																											1.10043	0.879578
		1.11728	0.879712																											1.11728	0.879712
		1.12334	0.881667																											1.12334	0.881667
		1.1333	0.882057																											1.1333	0.882057
		1.1422	0.882135																											1.1422	0.882135
		1.14761	0.885647																											1.14761	0.885647
		1.16143	0.892006																											1.16143	0.892006
		1.17289	0.916212																											1.17289	0.916212
		1.18636	0.922969																											1.18636	0.922969
		1.18764	0.932592																											1.18764	0.932592
		1.18796	0.935321																											1.18796	0.935321
		1.1953	0.945235																											1.1953	0.945235
		1.20395	0.959693																											1.20395	0.959693
		1.21479	0.975547																											1.21479	0.975547
		1.22345	0.997319																											1.22345	0.997319
		1.22628	1.01809																											1.22628	1.01809
		1.23326	1.04253																											1.23326	1.04253
		1.26502	1.06988																											1.26502	1.06988
		1.27298	0.403929																											1.27298	0.403929
		1.27631	0.476075																											1.27631	0.476075
		1.28055	0.479175																											1.28055	0.479175
		1.3002	0.503791																											1.3002	0.503791
		1.32557	0.511766																											1.32557	0.511766
		1.33047	0.525661																											1.33047	0.525661
		1.40977	0.53913																											1.40977	0.53913
		1.41993	0.540902																											1.41993	0.540902
		1.42737	0.546129																											1.42737	0.546129
		1.45638	0.547309																											1.45638	0.547309
		1.4661	0.550535																											1.4661	0.550535
		1.50082	0.558732																											1.50082	0.558732
		1.57178	0.564009																											1.57178	0.564009
		1.57446	0.567709																											1.57446	0.567709
		1.7336	0.572546																											1.7336	0.572546
		0.648883	0.579222																											0.648883	0.579222
		0.718797	0.589261																											0.718797	0.589261
		0.733869	0.595473																											0.733869	0.595473
		0.775315	0.597301																											0.775315	0.597301
		0.805932	0.601804																											0.805932	0.601804
		0.807407	0.618749																											0.807407	0.618749
		0.808817	0.621107																											0.808817	0.621107
		0.809913	0.621388																											0.809913	0.621388
		0.816896	0.621692																											0.816896	0.621692
		0.818264	0.622052																											0.818264	0.622052
		0.826994	0.622622																											0.826994	0.622622
		0.830127	0.6253																											0.830127	0.6253
		0.832765	0.62665																											0.832765	0.62665
		0.851857	0.644513																											0.851857	0.644513
		0.854937	0.649479																											0.854937	0.649479
		0.872122	0.657305																											0.872122	0.657305
		0.877131	0.663481																											0.877131	0.663481
		0.877342	0.66378																											0.877342	0.66378
		0.880429	0.66456																											0.880429	0.66456
		0.884206	0.664932																											0.884206	0.664932
		0.889887	0.667361																											0.889887	0.667361
		0.898168	0.668668																											0.898168	0.668668
		0.906538	0.669131																											0.906538	0.669131
		0.920644	0.677493																											0.920644	0.677493
		0.931105	0.684129																											0.931105	0.684129
		0.948685	0.685083																											0.948685	0.685083
		0.950762	0.688774																											0.950762	0.688774
		0.950898	0.692016																											0.950898	0.692016
		0.951558	0.693119																											0.951558	0.693119
		0.954546	0.698954																											0.954546	0.698954
		0.955714	0.699512																											0.955714	0.699512
		0.957	0.703152																											0.957	0.703152
		0.97252	0.724014																											0.97252	0.724014
		0.973413	0.725815																											0.973413	0.725815
		0.982181	0.726084																											0.982181	0.726084
		0.987209	0.730192																											0.987209	0.730192
		0.994558	0.736121																											0.994558	0.736121
		1	0.73904																											1	0.73904
		1	0.752299																											1	0.752299
		1.00243	0.759557																											1.00243	0.759557
		1.00665	0.760628																											1.00665	0.760628
		1.01931	0.765029																											1.01931	0.765029
		1.02134	0.765839																											1.02134	0.765839
		1.02275	0.789179																											1.02275	0.789179
		1.02766	0.835826																											1.02766	0.835826
		1.03513	0.836747																											1.03513	0.836747
		1.04062	0.876719																											1.04062	0.876719
		1.0421	0.886036																											1.0421	0.886036
		1.04308	0.904704																											1.04308	0.904704
		1.04569	0.949868																											1.04569	0.949868
		1.052	1.04374																											1.052	1.04374
		1.05219	1.05883																											1.05219	1.05883
		1.0596	0.415872																											1.0596	0.415872
		1.07411	0.490061																											1.07411	0.490061
		1.07444	0.510308																											1.07444	0.510308
		1.0753	0.518039																											1.0753	0.518039
		1.09142	0.520745																											1.09142	0.520745
		1.09264	0.533734																											1.09264	0.533734
		1.09316	0.534215																											1.09316	0.534215
		1.10951	0.548243																											1.10951	0.548243
		1.11132	0.559434																											1.11132	0.559434
		1.11413	0.560779																											1.11413	0.560779
		1.1146	0.564678																											1.1146	0.564678
		1.12163	0.570403																											1.12163	0.570403
		1.12234	0.585115																											1.12234	0.585115
		1.12836	0.592391																											1.12836	0.592391
		1.13343	0.596696																											1.13343	0.596696
		1.14297	0.597961																											1.14297	0.597961
		1.15585	0.600677																											1.15585	0.600677
		1.15707	0.601864																											1.15707	0.601864
		1.16978	0.607434																											1.16978	0.607434
		1.1774	0.608906																											1.1774	0.608906
		1.17912	0.612695																											1.17912	0.612695
		1.19024	0.616134																											1.19024	0.616134
		1.21059	0.620324																											1.21059	0.620324
		1.21606	0.621724																											1.21606	0.621724
		1.2381	0.626176																											1.2381	0.626176
		1.24206	0.62662																											1.24206	0.62662
		1.25501	0.627332																											1.25501	0.627332
		1.26325	0.629964																											1.26325	0.629964
		1.28307	0.640044																											1.28307	0.640044
		1.28491	0.655484																											1.28491	0.655484
		1.28548	0.658589																											1.28548	0.658589
		1.31795	0.660398																											1.31795	0.660398
		1.33219	0.661831																											1.33219	0.661831
		1.37347	0.663401																											1.37347	0.663401
		1.41822	0.673757																											1.41822	0.673757
		1.43644	0.67393																											1.43644	0.67393
		1.49026	0.676392																											1.49026	0.676392
		1.49949	0.677268																											1.49949	0.677268
		1.50812	0.682033																											1.50812	0.682033
		1.63241	0.690686																											1.63241	0.690686
		0.760525	0.695039																											0.760525	0.695039
		0.854699	0.705091																											0.854699	0.705091
		0.878361	0.707007																											0.878361	0.707007
		0.906642	0.709718																											0.906642	0.709718
		0.907459	0.734652																											0.907459	0.734652
		0.929259	0.757412																											0.929259	0.757412
		0.941749	0.778914																											0.941749	0.778914
		0.967145	0.782491																											0.967145	0.782491
		0.971567	0.782753																											0.971567	0.782753
		0.98026	0.784786																											0.98026	0.784786
		1.00712	0.795235																											1.00712	0.795235
		1.0075	0.816156																											1.0075	0.816156
		1.0091	0.818894																											1.0091	0.818894
		1.03381	0.822934																											1.03381	0.822934
		1.04588	0.827604																											1.04588	0.827604
		1.05026	0.833061																											1.05026	0.833061
		1.05083	0.833526																											1.05083	0.833526
		1.06164	0.837873																											1.06164	0.837873
		1.06282	0.847284																											1.06282	0.847284
		1.07351	0.850718																											1.07351	0.850718
		1.08903	0.851685																											1.08903	0.851685
		1.09872	0.867887																											1.09872	0.867887
		1.09984	0.868705																											1.09984	0.868705
		1.10043	0.874878																											1.10043	0.874878
		1.11728	0.879578																											1.11728	0.879578
		1.12334	0.879712																											1.12334	0.879712
		1.1333	0.881667																											1.1333	0.881667
		1.1422	0.882057																											1.1422	0.882057
		1.14761	0.882135																											1.14761	0.882135
		1.16143	0.885647																											1.16143	0.885647
		1.17289	0.892006																											1.17289	0.892006
		1.18636	0.916212																											1.18636	0.916212
		1.18764	0.922969																											1.18764	0.922969
		1.18796	0.932592																											1.18796	0.932592
		1.1953	0.935321																											1.1953	0.935321
		1.20395	0.945235																											1.20395	0.945235
		1.21479	0.959693																											1.21479	0.959693
		1.22345	0.975547																											1.22345	0.975547
		1.22628	0.997319																											1.22628	0.997319
		1.23326	1.01809																											1.23326	1.01809
		1.26502	1.04253																											1.26502	1.04253
		1.27298	1.06988																											1.27298	1.06988
		1.27631	0.195937																											1.27631	0.195937
		1.28055	0.245043																											1.28055	0.245043
		1.3002	0.252217																											1.3002	0.252217
		1.32557	0.26426																											1.32557	0.26426
		1.33047	0.266525																											1.33047	0.266525
		1.40977	0.279798																											1.40977	0.279798
		1.41993	0.313876																											1.41993	0.313876
		1.42737	0.318989																											1.42737	0.318989
		1.45638	0.331605																											1.45638	0.331605
		1.4661	0.350578																											1.4661	0.350578
		1.50082	0.35925																											1.50082	0.35925
		1.57178	0.364363																											1.57178	0.364363
		1.57446	0.376844																											1.57446	0.376844
		1.7336	0.404467																											1.7336	0.404467
		0.501966	0.408393																											0.501966	0.408393
		0.568071	0.41115																											0.568071	0.41115
		0.578768	0.414559																											0.578768	0.414559
		0.582336	0.434921																											0.582336	0.434921
		0.639794	0.435943																											0.639794	0.435943
		0.690466	0.450326																											0.690466	0.450326
		0.690658	0.451545																											0.690658	0.451545
		0.748891	0.455464																											0.748891	0.455464
		0.761095	0.45586																											0.761095	0.45586
		0.762112	0.457537																											0.762112	0.457537
		0.763156	0.471977																											0.763156	0.471977
		0.764786	0.472071																											0.764786	0.472071
		0.766139	0.472309																											0.766139	0.472309
		0.768222	0.475996																											0.768222	0.475996
		0.769571	0.476015																											0.769571	0.476015
		0.786456	0.477618																											0.786456	0.477618
		0.787742	0.484181																											0.787742	0.484181
		0.787881	0.485249																											0.787881	0.485249
		0.797252	0.490659																											0.797252	0.490659
		0.801573	0.492224																											0.801573	0.492224
		0.822084	0.49304																											0.822084	0.49304
		0.822545	0.495614																											0.822545	0.495614
		0.835396	0.496584																											0.835396	0.496584
		0.84095	0.5																											0.84095	0.5
		0.841961	0.500877																											0.841961	0.500877
		0.844861	0.50472																											0.844861	0.50472
		0.844885	0.505171																											0.844885	0.505171
		0.8473	0.506167																											0.8473	0.506167
		0.850777	0.506498																											0.850777	0.506498
		0.860139	0.509022																											0.860139	0.509022
		0.861689	0.509824																											0.861689	0.509824
		0.872401	0.511263																											0.872401	0.511263
		0.873057	0.515381																											0.873057	0.515381
		0.876552	0.515917																											0.876552	0.515917
		0.877825	0.517182																											0.877825	0.517182
		0.878061	0.518062																											0.878061	0.518062
		0.884012	0.518826																											0.884012	0.518826
		0.884199	0.520311																											0.884199	0.520311
		0.885526	0.520393																											0.885526	0.520393
		0.886117	0.521291																											0.886117	0.521291
		0.8881	0.524122																											0.8881	0.524122
		0.897952	0.524197																											0.897952	0.524197
		0.899279	0.52896																											0.899279	0.52896
		0.903103	0.529725																											0.903103	0.529725
		0.906542	0.533897																											0.906542	0.533897
		0.906984	0.535627																											0.906984	0.535627
		0.907759	0.54107																											0.907759	0.54107
		0.909725	0.542759																											0.909725	0.542759
		0.910257	0.543336																											0.910257	0.543336
		0.911173	0.545887																											0.911173	0.545887
		0.912317	0.546429																											0.912317	0.546429
		0.913866	0.547398																											0.913866	0.547398
		0.914832	0.54782																											0.914832	0.54782
		0.917555	0.547894																											0.917555	0.547894
		0.917646	0.549527																											0.917646	0.549527
		0.918392	0.55085																											0.918392	0.55085
		0.919999	0.551207																											0.919999	0.551207
		0.923618	0.55194																											0.923618	0.55194
		0.924327	0.557961																											0.924327	0.557961
		0.924366	0.558356																											0.924366	0.558356
		0.924652	0.559027																											0.924652	0.559027
		0.924884	0.559561																											0.924884	0.559561
		0.9258	0.561284																											0.9258	0.561284
		0.928689	0.56479																											0.928689	0.56479
		0.928925	0.566501																											0.928925	0.566501
		0.929945	0.567006																											0.929945	0.567006
		0.933207	0.567333																											0.933207	0.567333
		0.933799	0.567617																											0.933799	0.567617
		0.934239	0.569328																											0.934239	0.569328
		0.934732	0.57872																											0.934732	0.57872
		0.941588	0.581841																											0.941588	0.581841
		0.944283	0.583532																											0.944283	0.583532
		0.944389	0.583925																											0.944389	0.583925
		0.944423	0.584497																											0.944423	0.584497
		0.94815	0.585395																											0.94815	0.585395
		0.949522	0.58642																											0.949522	0.58642
		0.950956	0.588525																											0.950956	0.588525
		0.951477	0.588875																											0.951477	0.588875
		0.953326	0.589492																											0.953326	0.589492
		0.953412	0.589812																											0.953412	0.589812
		0.954343	0.594929																											0.954343	0.594929
		0.955517	0.595227																											0.955517	0.595227
		0.956673	0.59644																											0.956673	0.59644
		0.957544	0.598301																											0.957544	0.598301
		0.957547	0.598804																											0.957547	0.598804
		0.958815	0.599724																											0.958815	0.599724
		0.959316	0.602979																											0.959316	0.602979
		0.960415	0.604046																											0.960415	0.604046
		0.960854	0.607572																											0.960854	0.607572
		0.961991	0.608615																											0.961991	0.608615
		0.962154	0.609638																											0.962154	0.609638
		0.96291	0.611831																											0.96291	0.611831
		0.963429	0.612745																											0.963429	0.612745
		0.964738	0.614305																											0.964738	0.614305
		0.969271	0.614476																											0.969271	0.614476
		0.970838	0.614973																											0.970838	0.614973
		0.973451	0.615389																											0.973451	0.615389
		0.973881	0.615918																											0.973881	0.615918
		0.974273	0.617104																											0.974273	0.617104
		0.974704	0.6202																											0.974704	0.6202
		0.975733	0.620563																											0.975733	0.620563
		0.97599	0.621654																											0.97599	0.621654
		0.977145	0.624121																											0.977145	0.624121
		0.977265	0.624149																											0.977265	0.624149
		0.979997	0.62574																											0.979997	0.62574
		0.980029	0.627076																											0.980029	0.627076
		0.980334	0.627907																											0.980334	0.627907
		0.980334	0.628527																											0.980334	0.628527
		0.980723	0.629788																											0.980723	0.629788
		0.980995	0.631971																											0.980995	0.631971
		0.98126	0.631977																											0.98126	0.631977
		0.981971	0.632741																											0.981971	0.632741
		0.983483	0.638987																											0.983483	0.638987
		0.98425	0.639153																											0.98425	0.639153
		0.985801	0.639887																											0.985801	0.639887
		0.986537	0.640533																											0.986537	0.640533
		0.986609	0.6407																											0.986609	0.6407
		0.986708	0.64075																											0.986708	0.64075
		0.987008	0.641074																											0.987008	0.641074
		0.988457	0.641628																											0.988457	0.641628
		0.988602	0.64195																											0.988602	0.64195
		0.989124	0.642863																											0.989124	0.642863
		0.989982	0.642947																											0.989982	0.642947
		0.990381	0.645072																											0.990381	0.645072
		0.990446	0.646546																											0.990446	0.646546
		0.991808	0.647419																											0.991808	0.647419
		0.991885	0.647756																											0.991885	0.647756
		0.991897	0.647828																											0.991897	0.647828
		0.992005	0.64839																											0.992005	0.64839
		0.992186	0.649371																											0.992186	0.649371
		0.992266	0.649457																											0.992266	0.649457
		0.992574	0.650408																											0.992574	0.650408
		0.992651	0.651596																											0.992651	0.651596
		0.995203	0.651902																											0.995203	0.651902
		0.99582	0.652894																											0.99582	0.652894
		0.996472	0.653392																											0.996472	0.653392
		0.99653	0.653605																											0.99653	0.653605
		0.996601	0.653899																											0.996601	0.653899
		0.996719	0.655878																											0.996719	0.655878
		0.996727	0.658929																											0.996727	0.658929
		0.997396	0.660592																											0.997396	0.660592
		0.997663	0.660672																											0.997663	0.660672
		0.997875	0.66091																											0.997875	0.66091
		0.998193	0.662317																											0.998193	0.662317
		0.998349	0.662446																											0.998349	0.662446
		0.998505	0.662517																											0.998505	0.662517
		0.998549	0.662686																											0.998549	0.662686
		1	0.664149																											1	0.664149
		1	0.664429																											1	0.664429
		1.00084	0.66549																											1.00084	0.66549
		1.00091	0.666124																											1.00091	0.666124
		1.00094	0.667569																											1.00094	0.667569
		1.00165	0.668496																											1.00165	0.668496
		1.00209	0.669347																											1.00209	0.669347
		1.00212	0.66957																											1.00212	0.66957
		1.00242	0.669805																											1.00242	0.669805
		1.0026	0.670592																											1.0026	0.670592
		1.00284	0.6713																											1.00284	0.6713
		1.00303	0.672303																											1.00303	0.672303
		1.00316	0.673779																											1.00316	0.673779
		1.00337	0.673843																											1.00337	0.673843
		1.00396	0.674595																											1.00396	0.674595
		1.00414	0.677077																											1.00414	0.677077
		1.00421	0.677303																											1.00421	0.677303
		1.00428	0.677543																											1.00428	0.677543
		1.0044	0.678818																											1.0044	0.678818
		1.00475	0.67963																											1.00475	0.67963
		1.00527	0.68175																											1.00527	0.68175
		1.00578	0.682522																											1.00578	0.682522
		1.00578	0.688351																											1.00578	0.688351
		1.0062	0.690652																											1.0062	0.690652
		1.00715	0.693475																											1.00715	0.693475
		1.00745	0.693655																											1.00745	0.693655
		1.00827	0.69428																											1.00827	0.69428
		1.00837	0.69428																											1.00837	0.69428
		1.00839	0.69466																											1.00839	0.69466
		1.00927	0.696656																											1.00927	0.696656
		1.00978	0.697046																											1.00978	0.697046
		1.00984	0.697235																											1.00984	0.697235
		1.0108	0.698074																											1.0108	0.698074
		1.01109	0.69972																											1.01109	0.69972
		1.01153	0.699764																											1.01153	0.699764
		1.01235	0.700021																											1.01235	0.700021
		1.01296	0.700162																											1.01296	0.700162
		1.01305	0.700299																											1.01305	0.700299
		1.01392	0.70129																											1.01392	0.70129
		1.01411	0.701762																											1.01411	0.701762
		1.01442	0.702317																											1.01442	0.702317
		1.01512	0.703065																											1.01512	0.703065
		1.0157	0.703078																											1.0157	0.703078
		1.01639	0.705278																											1.01639	0.705278
		1.01641	0.705809																											1.01641	0.705809
		1.01646	0.706324																											1.01646	0.706324
		1.01704	0.707075																											1.01704	0.707075
		1.01758	0.70864																											1.01758	0.70864
		1.01792	0.709485																											1.01792	0.709485
		1.01851	0.710661																											1.01851	0.710661
		1.0188	0.710957																											1.0188	0.710957
		1.01881	0.717894																											1.01881	0.717894
		1.01884	0.720858																											1.01884	0.720858
		1.01899	0.721542																											1.01899	0.721542
		1.02	0.72234																											1.02	0.72234
		1.02077	0.722538																											1.02077	0.722538
		1.02091	0.722552																											1.02091	0.722552
		1.02109	0.723521																											1.02109	0.723521
		1.02111	0.724006																											1.02111	0.724006
		1.02146	0.724131																											1.02146	0.724131
		1.02155	0.72472																											1.02155	0.72472
		1.02264	0.726352																											1.02264	0.726352
		1.02328	0.72698																											1.02328	0.72698
		1.0241	0.727187																											1.0241	0.727187
		1.02576	0.727661																											1.02576	0.727661
		1.02587	0.727796																											1.02587	0.727796
		1.02611	0.728666																											1.02611	0.728666
		1.02886	0.729867																											1.02886	0.729867
		1.02921	0.729982																											1.02921	0.729982
		1.03064	0.731003																											1.03064	0.731003
		1.03073	0.732519																											1.03073	0.732519
		1.03127	0.732531																											1.03127	0.732531
		1.03178	0.733171																											1.03178	0.733171
		1.0321	0.734152																											1.0321	0.734152
		1.0325	0.734892																											1.0325	0.734892
		1.03473	0.735844																											1.03473	0.735844
		1.03587	0.736193																											1.03587	0.736193
		1.03604	0.736581																											1.03604	0.736581
		1.03664	0.737029																											1.03664	0.737029
		1.03829	0.737601																											1.03829	0.737601
		1.03936	0.739073																											1.03936	0.739073
		1.04064	0.739813																											1.04064	0.739813
		1.04154	0.741803																											1.04154	0.741803
		1.04192	0.742135																											1.04192	0.742135
		1.04253	0.744015																											1.04253	0.744015
		1.04253	0.745538																											1.04253	0.745538
		1.04349	0.746634																											1.04349	0.746634
		1.04353	0.750826																											1.04353	0.750826
		1.04369	0.750862																											1.04369	0.750862
		1.04645	0.751023																											1.04645	0.751023
		1.04708	0.752101																											1.04708	0.752101
		1.0475	0.753705																											1.0475	0.753705
		1.04769	0.75559																											1.04769	0.75559
		1.04789	0.756951																											1.04789	0.756951
		1.04849	0.757405																											1.04849	0.757405
		1.04917	0.758044																											1.04917	0.758044
		1.04924	0.758923																											1.04924	0.758923
		1.04964	0.760003																											1.04964	0.760003
		1.05345	0.761118																											1.05345	0.761118
		1.05377	0.762738																											1.05377	0.762738
		1.05397	0.762767																											1.05397	0.762767
		1.05407	0.762898																											1.05407	0.762898
		1.0554	0.764095																											1.0554	0.764095
		1.05594	0.764189																											1.05594	0.764189
		1.05689	0.764378																											1.05689	0.764378
		1.05759	0.764813																											1.05759	0.764813
		1.05908	0.765286																											1.05908	0.765286
		1.05986	0.765532																											1.05986	0.765532
		1.06087	0.765742																											1.06087	0.765742
		1.06201	0.766727																											1.06201	0.766727
		1.06397	0.767355																											1.06397	0.767355
		1.06487	0.772948																											1.06487	0.772948
		1.06611	0.773636																											1.06611	0.773636
		1.06643	0.77438																											1.06643	0.77438
		1.06681	0.777175																											1.06681	0.777175
		1.06912	0.77736																											1.06912	0.77736
		1.0692	0.777972																											1.0692	0.777972
		1.06981	0.778777																											1.06981	0.778777
		1.07017	0.779617																											1.07017	0.779617
		1.0714	0.780409																											1.0714	0.780409
		1.07305	0.781529																											1.07305	0.781529
		1.0746	0.781875																											1.0746	0.781875
		1.07462	0.782807																											1.07462	0.782807
		1.07475	0.783111																											1.07475	0.783111
		1.07534	0.784714																											1.07534	0.784714
		1.0757	0.785496																											1.0757	0.785496
		1.07684	0.790673																											1.07684	0.790673
		1.07747	0.790962																											1.07747	0.790962
		1.07758	0.791652																											1.07758	0.791652
		1.07764	0.791746																											1.07764	0.791746
		1.07857	0.793404																											1.07857	0.793404
		1.07944	0.793612																											1.07944	0.793612
		1.08174	0.793752																											1.08174	0.793752
		1.08334	0.794472																											1.08334	0.794472
		1.08351	0.794604																											1.08351	0.794604
		1.08466	0.79962																											1.08466	0.79962
		1.08475	0.800694																											1.08475	0.800694
		1.0857	0.800765																											1.0857	0.800765
		1.08652	0.804492																											1.08652	0.804492
		1.08736	0.80622																											1.08736	0.80622
		1.08781	0.809524																											1.08781	0.809524
		1.08815	0.811954																											1.08815	0.811954
		1.08958	0.812231																											1.08958	0.812231
		1.08965	0.813622																											1.08965	0.813622
		1.09015	0.81536																											1.09015	0.81536
		1.09066	0.815447																											1.09066	0.815447
		1.09092	0.816594																											1.09092	0.816594
		1.09092	0.817377																											1.09092	0.817377
		1.09161	0.818177																											1.09161	0.818177
		1.09175	0.81924																											1.09175	0.81924
		1.09376	0.822898																											1.09376	0.822898
		1.09426	0.82292																											1.09426	0.82292
		1.09504	0.824711																											1.09504	0.824711
		1.09775	0.824789																											1.09775	0.824789
		1.09916	0.825389																											1.09916	0.825389
		1.09917	0.826294																											1.09917	0.826294
		1.09931	0.826697																											1.09931	0.826697
		1.10053	0.828848																											1.10053	0.828848
		1.10193	0.830193																											1.10193	0.830193
		1.10236	0.830328																											1.10236	0.830328
		1.10303	0.831171																											1.10303	0.831171
		1.10374	0.831759																											1.10374	0.831759
		1.10436	0.832559																											1.10436	0.832559
		1.10473	0.835868																											1.10473	0.835868
		1.10475	0.836037																											1.10475	0.836037
		1.10569	0.840004																											1.10569	0.840004
		1.10772	0.842627																											1.10772	0.842627
		1.10884	0.844538																											1.10884	0.844538
		1.11077	0.845959																											1.11077	0.845959
		1.11147	0.846369																											1.11147	0.846369
		1.11184	0.849896																											1.11184	0.849896
		1.11746	0.849989																											1.11746	0.849989
		1.11791	0.851011																											1.11791	0.851011
		1.1188	0.851548																											1.1188	0.851548
		1.11891	0.852512																											1.11891	0.852512
		1.12034	0.854074																											1.12034	0.854074
		1.12074	0.854263																											1.12074	0.854263
		1.12147	0.85504																											1.12147	0.85504
		1.12401	0.855935																											1.12401	0.855935
		1.12565	0.860968																											1.12565	0.860968
		1.12578	0.861619																											1.12578	0.861619
		1.12743	0.861789																											1.12743	0.861789
		1.12773	0.862202																											1.12773	0.862202
		1.12776	0.862869																											1.12776	0.862869
		1.12801	0.863348																											1.12801	0.863348
		1.12803	0.864394																											1.12803	0.864394
		1.12824	0.867317																											1.12824	0.867317
		1.1287	0.873131																											1.1287	0.873131
		1.12888	0.875769																											1.12888	0.875769
		1.12993	0.880626																											1.12993	0.880626
		1.13063	0.880688																											1.13063	0.880688
		1.13314	0.882697																											1.13314	0.882697
		1.13378	0.884198																											1.13378	0.884198
		1.13519	0.884676																											1.13519	0.884676
		1.13704	0.888317																											1.13704	0.888317
		1.13915	0.892239																											1.13915	0.892239
		1.14133	0.895475																											1.14133	0.895475
		1.14169	0.897877																											1.14169	0.897877
		1.14274	0.902116																											1.14274	0.902116
		1.14283	0.903087																											1.14283	0.903087
		1.14471	0.903729																											1.14471	0.903729
		1.14497	0.904084																											1.14497	0.904084
		1.14714	0.905339																											1.14714	0.905339
		1.14904	0.906531																											1.14904	0.906531
		1.15092	0.907675																											1.15092	0.907675
		1.151	0.910172																											1.151	0.910172
		1.15178	0.910539																											1.15178	0.910539
		1.15231	0.911571																											1.15231	0.911571
		1.15361	0.911819																											1.15361	0.911819
		1.15409	0.915721																											1.15409	0.915721
		1.1547	0.915741																											1.1547	0.915741
		1.15657	0.921039																											1.15657	0.921039
		1.15973	0.923201																											1.15973	0.923201
		1.16688	0.927712																											1.16688	0.927712
		1.16881	0.92844																											1.16881	0.92844
		1.17045	0.929797																											1.17045	0.929797
		1.17481	0.93031																											1.17481	0.93031
		1.17579	0.934995																											1.17579	0.934995
		1.17738	0.935042																											1.17738	0.935042
		1.17926	0.947469																											1.17926	0.947469
		1.18112	0.949465																											1.18112	0.949465
		1.18295	0.955087																											1.18295	0.955087
		1.18305	0.955276																											1.18305	0.955276
		1.18414	0.956718																											1.18414	0.956718
		1.18494	0.96424																											1.18494	0.96424
		1.18518	0.968667																											1.18518	0.968667
		1.1869	0.970842																											1.1869	0.970842
		1.19241	0.97333																											1.19241	0.97333
		1.19325	0.973415																											1.19325	0.973415
		1.19652	0.974325																											1.19652	0.974325
		1.19728	0.977631																											1.19728	0.977631
		1.20738	0.983407																											1.20738	0.983407
		1.20911	0.988873																											1.20911	0.988873
		1.21	0.994771																											1.21	0.994771
		1.21291	1.00113																											1.21291	1.00113
		1.21591	1.00512																											1.21591	1.00512
		1.21921	1.01727																											1.21921	1.01727
		1.22192	1.04396																											1.22192	1.04396
		1.22487	1.04496																											1.22487	1.04496
		1.2259	1.09144																											1.2259	1.09144
		1.226	1.09606																											1.226	1.09606
		1.22805	1.09793																											1.22805	1.09793
		1.22943	1.23046																											1.22943	1.23046
		1.23058	1.23438																											1.23058	1.23438
		1.23124																												1.23124
		1.23323																												1.23323
		1.23401																												1.23401
		1.23869																												1.23869
		1.2387																												1.2387
		1.23969																												1.23969
		1.24307																												1.24307
		1.24355																												1.24355
		1.24723																												1.24723
		1.25867																												1.25867
		1.25908																												1.25908
		1.25919																												1.25919
		1.26493																												1.26493
		1.26851																												1.26851
		1.26971																												1.26971
		1.27023																												1.27023
		1.2703																												1.2703
		1.27546																												1.27546
		1.27679																												1.27679
		1.27985																												1.27985
		1.28348																												1.28348
		1.28447																												1.28447
		1.28484																												1.28484
		1.28824																												1.28824
		1.29147																												1.29147
		1.29159																												1.29159
		1.30522																												1.30522
		1.3103																												1.3103
		1.31208																												1.31208
		1.31218																												1.31218
		1.3235																												1.3235
		1.32701																												1.32701
		1.33016																												1.33016
		1.33362																												1.33362
		1.33631																												1.33631
		1.33689																												1.33689
		1.35241																												1.35241
		1.35433																												1.35433
		1.36162																												1.36162
		1.36308																												1.36308
		1.36509																												1.36509
		1.36816																												1.36816
		1.37794																												1.37794
		1.37845																												1.37845
		1.39113																												1.39113
		1.39294																												1.39294
		1.39408																												1.39408
		1.39763																												1.39763
		1.40239																												1.40239
		1.40256																												1.40256
		1.40334																												1.40334
		1.40668																												1.40668
		1.40904																												1.40904
		1.41025																												1.41025
		1.41042																												1.41042
		1.41439																												1.41439
		1.43022																												1.43022
		1.43112																												1.43112
		1.44125																												1.44125
		1.44357																												1.44357
		1.45075																												1.45075
		1.45209																												1.45209
		1.45288																												1.45288
		1.4648																												1.4648
		1.46757																												1.46757
		1.476																												1.476
		1.48355																												1.48355
		1.48989																												1.48989
		1.49342																												1.49342
		1.49613																												1.49613
		1.49617																												1.49617
		1.4994																												1.4994
		1.55809																												1.55809
		1.58471																												1.58471
		1.58631																												1.58631
		1.58977																												1.58977
		1.59497																												1.59497
		1.61158																												1.61158
		1.63065																												1.63065
		1.63489																												1.63489
		1.63898																												1.63898
		1.64989																												1.64989
		1.71303																												1.71303
		1.73762																												1.73762
		1.79148																												1.79148
		1.79234																												1.79234
		1.80987																												1.80987
		1.8401																												1.8401
		1.84564																												1.84564
		1.84954																												1.84954
		1.85168																												1.85168
		1.8783																												1.8783
		1.93723																												1.93723
		1.94589																												1.94589
		1.95316																												1.95316
		2.09105																												2.09105
		2.37342																												2.37342
		2.54606																												2.54606
