# Supplementary material for: Multiple antagonist calcium-dependent mechanisms control CaM kinase-1 subcellular localization in a C. elegans thermal nociceptor
Source: eLife. 2023 May 11;12:e85260. doi: 10.7554/eLife.85260 (PMC10174685; doi:10.7554/eLife.85260)
Supplement: Figure 2—source data 1. [file elife-85260-fig2-data1.xlsx]

## Sheet: Figure 2 source data
Figure 2 source data
Figure 2A					Figure 2B									Figure 2C
28°C	20°C	28°C	20°C		28°C	28°C	28°C	28°C	20°C	20°C	20°C	20°C		28°C	28°C	28°C	28°C	20°C	20°C	20°C	20°C
T179A	T179A	CMK-1(wt)	CMK-1(wt)		T179A; unc-68(dom13)	T179A	CMK-1(wt); unc-68(dom13)	CMK-1(wt)	T179A; unc-68(dom13)	T179A	CMK-1(wt); unc-68(dom13)	CMK-1(wt)		T179A; W305S	T179A	W305S	CMK-1(wt)	T179A; W305S	T179A	W305S	CMK-1(wt)
0.189403	0.366821	0.590775	0.294018		0.396353	0.189403	0.583211	0.590775	0.3617	0.366821	0.127369	0.294018		0.389464	0.189403	0.277121	0.590775	0.294943	0.366821	0.363107	0.294018
0.398599	0.424539	0.623502	0.350641		0.407159	0.398599	0.59404	0.623502	0.386969	0.424539	0.342146	0.350641		0.409769	0.398599	0.426513	0.623502	0.395475	0.424539	0.379444	0.350641
0.40275	0.462172	0.6449	0.408772		0.451797	0.40275	0.68385	0.6449	0.51352	0.462172	0.365356	0.408772		0.426117	0.40275	0.446306	0.6449	0.438108	0.462172	0.390051	0.408772
0.473383	0.469671	0.645435	0.409096		0.467927	0.473383	0.699024	0.645435	0.541348	0.469671	0.425949	0.409096		0.435476	0.473383	0.522627	0.645435	0.456795	0.469671	0.406815	0.409096
0.482814	0.500744	0.658204	0.448045		0.471538	0.482814	0.726424	0.658204	0.582506	0.500744	0.447856	0.448045		0.436203	0.482814	0.556752	0.658204	0.472819	0.500744	0.407038	0.448045
0.507269	0.516941	0.658658	0.467095		0.479641	0.507269	0.756691	0.658658	0.621057	0.516941	0.478575	0.467095		0.465865	0.507269	0.567228	0.658658	0.482824	0.516941	0.415075	0.467095
0.508164	0.539328	0.6655	0.468072		0.496334	0.508164	0.783013	0.6655	0.629642	0.539328	0.480208	0.468072		0.487895	0.508164	0.58671	0.6655	0.484125	0.539328	0.422963	0.468072
0.523499	0.539816	0.669988	0.468808		0.526805	0.523499	0.789438	0.669988	0.633059	0.539816	0.483579	0.468808		0.516876	0.523499	0.595079	0.669988	0.485328	0.539816	0.43935	0.468808
0.537699	0.544746	0.680463	0.504257		0.549448	0.537699	0.792804	0.680463	0.640538	0.544746	0.495186	0.504257		0.522353	0.537699	0.596348	0.680463	0.497541	0.544746	0.446114	0.504257
0.549435	0.545673	0.687726	0.51748		0.582971	0.549435	0.811658	0.687726	0.645151	0.545673	0.502895	0.51748		0.535642	0.549435	0.604492	0.687726	0.498535	0.545673	0.451694	0.51748
0.550481	0.559507	0.726894	0.518342		0.595409	0.550481	0.836304	0.726894	0.656055	0.559507	0.510019	0.518342		0.545651	0.550481	0.615637	0.726894	0.500789	0.559507	0.456271	0.518342
0.554869	0.572261	0.730697	0.520003		0.659647	0.554869	0.839918	0.730697	0.664028	0.572261	0.517905	0.520003		0.547396	0.554869	0.617448	0.730697	0.506367	0.572261	0.457563	0.520003
0.5586	0.578722	0.740046	0.525046		0.671468	0.5586	0.843503	0.740046	0.666667	0.578722	0.523828	0.525046		0.549671	0.5586	0.624902	0.740046	0.514221	0.578722	0.458109	0.525046
0.562778	0.58776	0.751302	0.533197		0.672595	0.562778	0.843886	0.751302	0.694728	0.58776	0.556582	0.533197		0.557065	0.562778	0.627675	0.751302	0.520178	0.58776	0.480482	0.533197
0.562812	0.594032	0.756872	0.542768		0.677909	0.562812	0.868604	0.756872	0.695767	0.594032	0.558412	0.542768		0.560773	0.562812	0.628672	0.756872	0.530082	0.594032	0.48675	0.542768
0.583113	0.604305	0.766572	0.543117		0.686582	0.583113	0.900633	0.766572	0.708388	0.604305	0.621786	0.543117		0.568867	0.583113	0.633186	0.766572	0.535765	0.604305	0.490712	0.543117
0.600194	0.631938	0.783417	0.552342		0.689099	0.600194	0.91584	0.783417	0.713808	0.631938	0.624212	0.552342		0.574631	0.600194	0.641577	0.783417	0.539818	0.631938	0.494347	0.552342
0.601196	0.641303	0.787051	0.555416		0.706309	0.601196	0.937773	0.787051	0.718052	0.641303	0.637081	0.555416		0.60034	0.601196	0.642001	0.787051	0.541213	0.641303	0.503528	0.555416
0.604372	0.650697	0.788489	0.566755		0.728603	0.604372	0.983579	0.788489	0.739019	0.650697	0.6387	0.566755		0.608275	0.604372	0.642907	0.788489	0.550247	0.650697	0.506217	0.566755
0.610286	0.657561	0.790604	0.584831		0.734567	0.610286	0.988875	0.790604	0.744149	0.657561	0.648598	0.584831		0.608433	0.610286	0.652098	0.790604	0.558652	0.657561	0.511697	0.584831
0.623193	0.660054	0.799819	0.589971		0.738481	0.623193	0.990923	0.799819	0.758945	0.660054	0.651066	0.589971		0.611962	0.623193	0.659323	0.799819	0.565642	0.660054	0.517024	0.589971
0.623815	0.660646	0.802384	0.590087		0.751462	0.623815	0.99184	0.802384	0.760368	0.660646	0.654085	0.590087		0.619	0.623815	0.667138	0.802384	0.590457	0.660646	0.518307	0.590087
0.64952	0.663717	0.823488	0.590344		0.751672	0.64952	1.01493	0.823488	0.761353	0.663717	0.668404	0.590344		0.623191	0.64952	0.6723	0.823488	0.593078	0.663717	0.533475	0.590344
0.649612	0.681638	0.829397	0.597197		0.816733	0.649612	1.01622	0.829397	0.76211	0.681638	0.669685	0.597197		0.647541	0.649612	0.685132	0.829397	0.594047	0.681638	0.534294	0.597197
0.649809	0.68166	0.831311	0.598268		0.845002	0.649809	1.01742	0.831311	0.764535	0.68166	0.670737	0.598268		0.649808	0.649809	0.687235	0.831311	0.597076	0.68166	0.541106	0.598268
0.660258	0.683823	0.832974	0.604808		0.871622	0.660258	1.01831	0.832974	0.772756	0.683823	0.677041	0.604808		0.650384	0.660258	0.699484	0.832974	0.598313	0.683823	0.547966	0.604808
0.683168	0.687801	0.835577	0.605763		0.885827	0.683168	1.03115	0.835577	0.800145	0.687801	0.678579	0.605763		0.652112	0.683168	0.700714	0.835577	0.602717	0.687801	0.551341	0.605763
0.713745	0.691947	0.835597	0.60916		0.891809	0.713745	1.04749	0.835597	0.828378	0.691947	0.690829	0.60916		0.656175	0.713745	0.703461	0.835597	0.610391	0.691947	0.557038	0.60916
0.718411	0.698469	0.835599	0.613633		0.950846	0.718411	1.04971	0.835599	0.876509	0.698469	0.694308	0.613633		0.65632	0.718411	0.70405	0.835599	0.615984	0.698469	0.560542	0.613633
0.722175	0.7137	0.838851	0.615541		0.980496	0.722175	1.0556	0.838851	0.909093	0.7137	0.696523	0.615541		0.657833	0.722175	0.708713	0.838851	0.627242	0.7137	0.562854	0.615541
0.759744	0.730922	0.844778	0.617144		0.985191	0.759744	1.05581	0.844778	0.911079	0.730922	0.698995	0.617144		0.661	0.759744	0.708943	0.844778	0.628536	0.730922	0.563628	0.617144
0.760814	0.733768	0.847683	0.624527		0.182941	0.760814	1.06416	0.847683	0.940894	0.733768	0.699142	0.624527		0.668	0.760814	0.709488	0.847683	0.63141	0.733768	0.566037	0.624527
0.761784	0.743012	0.851739	0.625454		0.357917	0.761784	1.08754	0.851739	0.946062	0.743012	0.706776	0.625454		0.670414	0.761784	0.720155	0.851739	0.638288	0.743012	0.570821	0.625454
0.774114	0.744952	0.852181	0.629054		0.403452	0.774114	1.09988	0.852181	0.959999	0.744952	0.706833	0.629054		0.67895	0.774114	0.732298	0.852181	0.647736	0.744952	0.572822	0.629054
0.786937	0.758633	0.85335	0.635871		0.422494	0.786937	1.1291	0.85335	1.01243	0.758633	0.71636	0.635871		0.679862	0.786937	0.732825	0.85335	0.657462	0.758633	0.573333	0.635871
0.794358	0.760221	0.85445	0.636666		0.436462	0.794358	1.1491	0.85445	1.06632	0.760221	0.72119	0.636666		0.683149	0.794358	0.734752	0.85445	0.664038	0.760221	0.574915	0.636666
0.799165	0.760338	0.856618	0.638662		0.440253	0.799165	1.1573	0.856618	1.17546	0.760338	0.721268	0.638662		0.684872	0.799165	0.737796	0.856618	0.677472	0.760338	0.577519	0.638662
0.809239	0.761202	0.860602	0.642405		0.477092	0.809239	1.15745	0.860602	0.326048	0.761202	0.723518	0.642405		0.694245	0.809239	0.739607	0.860602	0.678075	0.761202	0.578924	0.642405
0.818749	0.765204	0.862539	0.646833		0.489936	0.818749	1.15752	0.862539	0.401422	0.765204	0.723791	0.646833		0.698351	0.818749	0.740984	0.862539	0.68146	0.765204	0.587968	0.646833
0.827873	0.770102	0.871819	0.650001		0.492592	0.827873	1.16089	0.871819	0.481331	0.770102	0.730198	0.650001		0.711212	0.827873	0.742234	0.871819	0.684207	0.770102	0.588527	0.650001
0.837996	0.778514	0.8719	0.651736		0.492884	0.837996	1.1745	0.8719	0.50325	0.778514	0.731533	0.651736		0.712056	0.837996	0.74429	0.8719	0.685618	0.778514	0.601412	0.651736
0.844887	0.787676	0.87643	0.660401		0.494753	0.844887	1.18712	0.87643	0.516989	0.787676	0.73849	0.660401		0.717488	0.844887	0.748344	0.87643	0.703806	0.787676	0.603089	0.660401
0.854091	0.792621	0.87869	0.666119		0.50929	0.854091	1.20695	0.87869	0.517505	0.792621	0.73971	0.666119		0.726552	0.854091	0.752594	0.87869	0.70896	0.792621	0.605845	0.666119
0.855005	0.793438	0.888275	0.666673		0.513076	0.855005	1.22178	0.888275	0.518845	0.793438	0.742289	0.666673		0.735692	0.855005	0.753517	0.888275	0.71148	0.793438	0.619266	0.666673
0.870613	0.811717	0.89489	0.667255		0.513148	0.870613	1.22663	0.89489	0.535035	0.811717	0.744347	0.667255		0.737934	0.870613	0.766789	0.89489	0.713319	0.811717	0.624192	0.667255
0.87118	0.81991	0.896931	0.672183		0.513258	0.87118	1.23981	0.896931	0.535512	0.81991	0.748423	0.672183		0.744307	0.87118	0.782323	0.896931	0.723379	0.81991	0.624528	0.672183
0.915181	0.852438	0.901104	0.672876		0.514797	0.915181	1.2549	0.901104	0.545928	0.852438	0.761307	0.672876		0.744911	0.915181	0.784366	0.901104	0.727267	0.852438	0.635645	0.672876
0.941738	0.859791	0.904978	0.679565		0.51515	0.941738	1.25661	0.904978	0.546004	0.859791	0.762169	0.679565		0.745257	0.941738	0.785858	0.904978	0.730655	0.859791	0.635744	0.679565
0.946947	0.861788	0.906482	0.68559		0.51599	0.946947	1.29099	0.906482	0.558826	0.861788	0.77941	0.68559		0.748501	0.946947	0.7896	0.906482	0.737987	0.861788	0.639166	0.68559
0.947655	0.868135	0.909817	0.688789		0.532085	0.947655	1.29192	0.909817	0.562719	0.868135	0.787879	0.688789		0.754669	0.947655	0.798026	0.909817	0.742746	0.868135	0.649711	0.688789
1.09818	0.878063	0.918314	0.690741		0.534775	1.09818	1.2973	0.918314	0.564443	0.878063	0.793146	0.690741		0.757976	1.09818	0.80439	0.918314	0.744599	0.878063	0.651589	0.690741
0.433445	0.889758	0.918767	0.693852		0.536391	0.433445	1.30064	0.918767	0.59222	0.889758	0.801772	0.693852		0.758812	0.433445	0.805831	0.918767	0.746673	0.889758	0.65336	0.693852
0.4539	0.922952	0.919119	0.694812		0.542119	0.4539	1.30975	0.919119	0.596265	0.922952	0.80357	0.694812		0.764181	0.4539	0.807379	0.919119	0.752773	0.922952	0.656983	0.694812
0.562727	0.931669	0.921767	0.699518		0.549327	0.562727	1.32056	0.921767	0.597103	0.931669	0.808032	0.699518		0.768462	0.562727	0.814167	0.921767	0.755643	0.931669	0.660536	0.699518
0.566797	0.941423	0.926217	0.703111		0.550757	0.566797	1.33897	0.926217	0.598068	0.941423	0.812051	0.703111		0.776633	0.566797	0.818174	0.926217	0.756539	0.941423	0.662928	0.703111
0.57972	0.986668	0.927683	0.704697		0.551689	0.57972	1.34176	0.927683	0.599618	0.986668	0.81229	0.704697		0.777371	0.57972	0.823365	0.927683	0.762258	0.986668	0.664894	0.704697
0.583363	0.996982	0.950228	0.705879		0.559129	0.583363	1.37322	0.950228	0.602439	0.996982	0.827757	0.705879		0.782166	0.583363	0.823953	0.950228	0.76382	0.996982	0.670441	0.705879
0.591748	1.00807	0.954172	0.707031		0.569789	0.591748	1.39519	0.954172	0.612689	1.00807	0.835778	0.707031		0.785768	0.591748	0.823996	0.954172	0.765925	1.00807	0.676472	0.707031
0.606883	1.00904	0.955789	0.709129		0.569948	0.606883	1.45862	0.955789	0.615104	1.00904	0.843545	0.709129		0.788466	0.606883	0.824882	0.955789	0.768258	1.00904	0.68383	0.709129
0.613149	1.09178	0.959304	0.709832		0.570369	0.613149	1.48806	0.959304	0.629238	1.09178	0.849184	0.709832		0.792995	0.613149	0.833058	0.959304	0.768399	1.09178	0.68643	0.709832
0.615954	0.2344	0.96633	0.71341		0.573276	0.615954	1.52306	0.96633	0.629951	0.2344	0.857722	0.71341		0.79793	0.615954	0.834658	0.96633	0.770056	0.2344	0.686764	0.71341
0.621602	0.265311	0.968239	0.718519		0.575929	0.621602	1.52505	0.968239	0.636476	0.265311	0.872401	0.718519		0.803164	0.621602	0.838053	0.968239	0.771474	0.265311	0.687951	0.718519
0.637117	0.336729	0.971076	0.720209		0.58308	0.637117	1.56736	0.971076	0.637692	0.336729	0.8865	0.720209		0.80455	0.637117	0.841913	0.971076	0.784688	0.336729	0.692514	0.720209
0.641547	0.365614	0.972397	0.725568		0.584969	0.641547	1.58351	0.972397	0.638402	0.365614	0.906386	0.725568		0.81604	0.641547	0.849517	0.972397	0.792556	0.365614	0.695507	0.725568
0.662593	0.37256	0.973111	0.733185		0.58786	0.662593	1.58927	0.973111	0.638874	0.37256	0.923515	0.733185		0.822624	0.662593	0.853919	0.973111	0.816455	0.37256	0.69865	0.733185
0.69533	0.5	0.980664	0.734465		0.588704	0.69533	1.606	0.980664	0.64982	0.5	0.935491	0.734465		0.827263	0.69533	0.861933	0.980664	0.828971	0.5	0.701593	0.734465
0.702894	0.507592	0.987634	0.734985		0.590473	0.702894	1.6135	0.987634	0.657213	0.507592	0.944215	0.734985		0.828088	0.702894	0.875338	0.987634	0.82961	0.507592	0.704379	0.734985
0.706327	0.517099	0.990888	0.736589		0.595607	0.706327	1.65695	0.990888	0.658114	0.517099	0.948871	0.736589		0.836253	0.706327	0.881825	0.990888	0.83209	0.517099	0.708281	0.736589
0.714886	0.552233	0.992997	0.736778		0.596994	0.714886	1.73384	0.992997	0.662682	0.552233	0.985229	0.736778		0.84446	0.714886	0.884932	0.992997	0.855578	0.552233	0.712581	0.736778
0.744272	0.559355	0.994042	0.738839		0.599624	0.744272	1.91942	0.994042	0.666662	0.559355	0.988687	0.738839		0.856164	0.744272	0.892166	0.994042	0.856023	0.559355	0.713169	0.738839
0.778581	0.581799	0.99841	0.743271		0.604751	0.778581	1.94726	0.99841	0.677464	0.581799	1.00488	0.743271		0.865683	0.778581	0.90194	0.99841	0.862858	0.581799	0.717888	0.743271
0.782573	0.590758	0.99874	0.745429		0.616117	0.782573	1.95342	0.99874	0.684895	0.590758	1.01907	0.745429		0.871046	0.782573	0.91719	0.99874	0.872509	0.590758	0.72017	0.745429
0.827635	0.60719	1.0048	0.74638		0.619381	0.827635	2.4536	1.0048	0.685535	0.60719	1.03204	0.74638		0.871687	0.827635	0.922523	1.0048	0.877456	0.60719	0.727051	0.74638
0.828071	0.617667	1.00895	0.7473		0.626162	0.828071	0.821901	1.00895	0.688181	0.617667	1.03778	0.7473		0.872444	0.828071	0.933618	1.00895	0.896218	0.617667	0.728581	0.7473
0.829259	0.625589	1.01226	0.747531		0.630002	0.829259	0.830175	1.01226	0.692067	0.625589	1.11581	0.747531		0.877028	0.829259	0.946879	1.01226	0.89791	0.625589	0.732572	0.747531
0.84345	0.638239	1.01231	0.748605		0.632339	0.84345	0.832423	1.01231	0.70185	0.638239	1.42428	0.748605		0.88426	0.84345	0.950288	1.01231	0.901999	0.638239	0.742883	0.748605
0.856504	0.654209	1.01289	0.749054		0.636743	0.856504	0.881585	1.01289	0.708157	0.654209	0.45342	0.749054		0.886631	0.856504	0.953622	1.01289	0.902643	0.654209	0.746167	0.749054
0.891837	0.655422	1.01605	0.751807		0.636949	0.891837	0.936682	1.01605	0.71726	0.655422	0.482678	0.751807		0.892842	0.891837	0.968368	1.01605	0.911992	0.655422	0.746679	0.751807
0.90591	0.669183	1.01747	0.764338		0.638112	0.90591	0.943143	1.01747	0.720899	0.669183	0.540231	0.764338		0.894474	0.90591	0.968988	1.01747	0.919039	0.669183	0.751839	0.764338
0.934308	0.702909	1.02306	0.767078		0.640407	0.934308	0.965019	1.02306	0.72124	0.702909	0.64967	0.767078		0.900533	0.934308	0.977026	1.02306	0.920203	0.702909	0.756673	0.767078
0.95654	0.704568	1.02541	0.767552		0.641808	0.95654	0.965519	1.02541	0.728435	0.704568	0.758499	0.767552		0.906121	0.95654	0.978777	1.02541	0.930533	0.704568	0.763232	0.767552
0.95971	0.738699	1.03408	0.769764		0.642098	0.95971	0.965648	1.03408	0.731372	0.738699	0.773009	0.769764		0.906237	0.95971	0.990462	1.03408	0.945983	0.738699	0.772239	0.769764
0.965095	0.74617	1.03744	0.773367		0.643357	0.965095	0.972946	1.03744	0.732312	0.74617	0.781747	0.773367		0.932414	0.965095	1.00157	1.03744	0.952813	0.74617	0.777214	0.773367
0.975612	0.749975	1.04079	0.775089		0.644592	0.975612	0.997597	1.04079	0.733226	0.749975	0.796256	0.775089		0.948544	0.975612	1.00254	1.04079	0.966645	0.749975	0.77741	0.775089
1.0158	0.750154	1.04091	0.779689		0.64622	1.0158	1.00402	1.04091	0.734985	0.750154	0.813447	0.779689		0.972855	1.0158	1.01139	1.04091	0.970686	0.750154	0.782056	0.779689
0.422949	0.761857	1.04098	0.784972		0.646656	0.422949	1.01362	1.04098	0.74545	0.761857	0.831999	0.784972		0.975607	0.422949	1.03182	1.04098	0.971687	0.761857	0.785545	0.784972
0.492723	0.763367	1.04166	0.787343		0.651292	0.492723	1.01891	1.04166	0.75233	0.763367	0.849185	0.787343		0.981725	0.492723	1.04532	1.04166	0.97305	0.763367	0.805662	0.787343
0.501765	0.768194	1.04184	0.797946		0.658737	0.501765	1.03809	1.04184	0.75925	0.768194	0.883031	0.797946		0.988928	0.501765	1.0497	1.04184	0.990173	0.768194	0.809249	0.797946
0.522164	0.770141	1.04489	0.799128		0.660156	0.522164	1.04067	1.04489	0.759436	0.770141	0.885311	0.799128		0.999152	0.522164	1.0616	1.04489	0.994242	0.770141	0.810988	0.799128
0.523615	0.771668	1.04637	0.799761		0.665602	0.523615	1.06439	1.04637	0.759659	0.771668	0.912595	0.799761		1.0085	0.523615	1.0848	1.04637	1.0048	0.771668	0.813521	0.799761
0.534896	0.774313	1.05492	0.802448		0.666099	0.534896	1.0655	1.05492	0.760589	0.774313	0.91561	0.802448		1.01132	0.534896	0.282897	1.05492	1.02438	0.774313	0.821347	0.802448
0.551225	0.782862	1.05796	0.807196		0.668936	0.551225	1.07797	1.05796	0.761151	0.782862	0.921173	0.807196		1.01795	0.551225	0.302505	1.05796	1.03434	0.782862	0.830342	0.807196
0.555478	0.787629	1.05874	0.807612		0.670996	0.555478	1.08114	1.05874	0.761987	0.787629	0.922356	0.807612		1.09273	0.555478	0.481642	1.05874	1.03852	0.787629	0.831844	0.807612
0.559693	0.799744	1.06777	0.814322		0.672152	0.559693	1.08326	1.06777	0.764801	0.799744	0.927201	0.814322		1.29813	0.559693	0.483412	1.06777	1.04903	0.799744	0.832454	0.814322
0.561385	0.807677	1.07572	0.821648		0.687382	0.561385	1.09515	1.07572	0.773841	0.807677	0.937857	0.821648		2.51063	0.561385	0.513828	1.07572	1.06516	0.807677	0.835569	0.821648
0.577482	0.809559	1.08344	0.838491		0.687958	0.577482	1.0979	1.08344	0.775922	0.809559	0.954055	0.838491		0.325584	0.577482	0.546473	1.08344	1.06686	0.809559	0.851169	0.838491
0.585037	0.818052	1.08713	0.841507		0.698098	0.585037	1.10543	1.08713	0.77894	0.818052	0.961442	0.841507		0.384618	0.585037	0.553724	1.08713	1.06745	0.818052	0.85876	0.841507
0.587138	0.818086	1.0914	0.842359		0.698461	0.587138	1.11152	1.0914	0.779467	0.818086	0.967164	0.842359		0.388114	0.587138	0.558485	1.0914	1.07006	0.818086	0.881713	0.842359
0.594926	0.821588	1.11241	0.845143		0.698833	0.594926	1.11917	1.11241	0.783886	0.821588	0.974385	0.845143		0.407638	0.594926	0.570878	1.11241	1.0968	0.821588	0.882513	0.845143
0.601835	0.826665	1.11272	0.845209		0.699076	0.601835	1.11968	1.11272	0.786796	0.826665	0.975638	0.845209		0.417544	0.601835	0.586221	1.11272	1.18193	0.826665	0.893137	0.845209
0.605227	0.852672	1.11549	0.8477		0.699108	0.605227	1.12149	1.11549	0.788941	0.852672	1.01227	0.8477		0.42425	0.605227	0.594371	1.11549	1.19901	0.852672	0.899811	0.8477
0.609643	0.85346	1.11758	0.855392		0.70112	0.609643	1.12452	1.11758	0.795815	0.85346	1.01271	0.855392		0.472043	0.609643	0.595255	1.11758	1.30315	0.85346	0.905257	0.855392
0.618194	0.862353	1.11928	0.860459		0.710254	0.618194	1.17841	1.11928	0.797011	0.862353	1.01466	0.860459		0.476499	0.618194	0.597493	1.11928	1.36681	0.862353	0.906594	0.860459
0.621794	0.865383	1.15011	0.86191		0.711236	0.621794	1.19031	1.15011	0.806002	0.865383	1.01502	0.86191		0.478201	0.621794	0.612019	1.15011	1.79322	0.865383	0.910578	0.86191
0.627171	0.8788	1.16951	0.868844		0.717312	0.627171	1.19626	1.16951	0.81441	0.8788	1.01903	0.868844		0.490733	0.627171	0.614668	1.16951	0.199867	0.8788	0.911374	0.868844
0.628212	0.881346	1.1736	0.87901		0.721103	0.628212	1.2027	1.1736	0.817605	0.881346	1.02024	0.87901		0.50935	0.628212	0.627682	1.1736	0.264623	0.881346	0.924406	0.87901
0.62917	0.946164	1.17412	0.884775		0.728066	0.62917	1.20856	1.17412	0.820989	0.946164	1.04054	0.884775		0.528221	0.62917	0.628525	1.17412	0.32082	0.946164	0.986868	0.884775
0.631442	0.978138	1.17754	0.885612		0.728556	0.631442	1.23875	1.17754	0.823204	0.978138	1.04653	0.885612		0.541179	0.631442	0.632857	1.17754	0.32528	0.978138	1	0.885612
0.637855	1.00136	1.18137	0.888684		0.735244	0.637855	1.25134	1.18137	0.831887	1.00136	1.05044	0.888684		0.548659	0.637855	0.639486	1.18137	0.37911	1.00136	1.03042	0.888684
0.640268	1.0363	1.18162	0.899911		0.742926	0.640268	1.25402	1.18162	0.832003	1.0363	1.07546	0.899911		0.557219	0.640268	0.6515	1.18162	0.390724	1.0363	1.13326	0.899911
0.64162	0.444582	1.19276	0.910713		0.745821	0.64162	1.25411	1.19276	0.847784	0.444582	1.08378	0.910713		0.569649	0.64162	0.662579	1.19276	0.418013	0.444582	1.15991	0.910713
0.650481	0.476362	1.19507	0.960854		0.751306	0.650481	1.2551	1.19507	0.852048	0.476362	1.08833	0.960854		0.585888	0.650481	0.666325	1.19507	0.426854	0.476362	0.3219	0.960854
0.65621	0.48213	1.20308	0.962724		0.752313	0.65621	1.26257	1.20308	0.852086	0.48213	1.09901	0.962724		0.585934	0.65621	0.667891	1.20308	0.444072	0.48213	0.356249	0.962724
0.657229	0.50078	1.20525	0.972351		0.754197	0.657229	1.27141	1.20525	0.857101	0.50078	1.1174	0.972351		0.591431	0.657229	0.67257	1.20525	0.449111	0.50078	0.387804	0.972351
0.657407	0.547036	1.20559	0.980806		0.760338	0.657407	1.3061	1.20559	0.858848	0.547036	1.12623	0.980806		0.593041	0.657407	0.675563	1.20559	0.452001	0.547036	0.394685	0.980806
0.672638	0.564699	1.21627	0.988629		0.763002	0.672638	1.31238	1.21627	0.871562	0.564699	1.12845	0.988629		0.602093	0.672638	0.676514	1.21627	0.464694	0.564699	0.397615	0.988629
0.676658	0.566423	1.22279	1.01655		0.772249	0.676658	1.315	1.22279	0.876218	0.566423	1.13244	1.01655		0.605609	0.676658	0.681084	1.22279	0.473688	0.566423	0.416344	1.01655
0.693257	0.580736	1.23801	1.02368		0.774985	0.693257	1.33567	1.23801	0.882193	0.580736	1.14635	1.02368		0.61048	0.693257	0.683165	1.23801	0.488771	0.580736	0.419776	1.02368
0.698155	0.586345	1.24327	1.03281		0.77646	0.698155	1.33948	1.24327	0.885211	0.586345	1.14747	1.03281		0.611639	0.698155	0.683357	1.24327	0.52064	0.586345	0.438539	1.03281
0.714956	0.593101	1.26349	1.07228		0.785351	0.714956	1.35376	1.26349	0.887844	0.593101	1.14908	1.07228		0.615031	0.714956	0.68683	1.26349	0.527948	0.593101	0.45162	1.07228
0.719068	0.59453	1.26578	1.09377		0.787395	0.719068	1.36598	1.26578	0.896426	0.59453	1.16143	1.09377		0.619476	0.719068	0.688066	1.26578	0.552449	0.59453	0.468769	1.09377
0.744561	0.594701	1.26879	1.11015		0.789629	0.744561	1.37026	1.26879	0.898911	0.594701	1.18117	1.11015		0.619996	0.744561	0.690768	1.26879	0.553769	0.594701	0.473047	1.11015
0.763079	0.6046	1.30074	1.11884		0.801939	0.763079	1.38042	1.30074	0.913817	0.6046	1.18152	1.11884		0.625611	0.763079	0.693208	1.30074	0.554586	0.6046	0.479759	1.11884
0.765001	0.604897	1.30749	1.18138		0.802148	0.765001	1.40043	1.30749	0.924047	0.604897	1.18242	1.18138		0.628802	0.765001	0.697137	1.30749	0.555254	0.604897	0.480001	1.18138
0.782218	0.606125	1.34587	0.304173		0.80261	0.782218	1.4106	1.34587	0.92498	0.606125	1.18735	0.304173		0.631697	0.782218	0.699438	1.34587	0.562858	0.606125	0.496771	0.304173
0.783734	0.612532	1.35369	0.361729		0.803857	0.783734	1.43577	1.35369	0.926058	0.612532	1.21386	0.361729		0.646947	0.783734	0.701978	1.35369	0.563073	0.612532	0.512935	0.361729
0.786325	0.625462	1.35809	0.385079		0.807779	0.786325	1.44204	1.35809	0.935047	0.625462	1.21605	0.385079		0.647353	0.786325	0.70427	1.35809	0.566837	0.625462	0.518622	0.385079
0.789019	0.626239	1.36129	0.415001		0.813146	0.789019	1.4705	1.36129	0.94038	0.626239	1.23523	0.415001		0.650911	0.789019	0.704507	1.36129	0.572511	0.626239	0.518938	0.415001
0.791805	0.632361	1.37592	0.445489		0.818441	0.791805	1.4886	1.37592	0.942153	0.632361	1.23625	0.445489		0.652472	0.791805	0.709475	1.37592	0.577012	0.632361	0.519504	0.445489
0.793161	0.635209	1.3888	0.452173		0.823012	0.793161	1.4984	1.3888	0.949929	0.635209	1.25301	0.452173		0.654709	0.793161	0.712258	1.3888	0.581634	0.635209	0.531274	0.452173
0.805256	0.653001	1.4171	0.455128		0.833624	0.805256	1.5066	1.4171	0.950971	0.653001	1.26742	0.455128		0.655658	0.805256	0.713189	1.4171	0.591634	0.653001	0.537124	0.455128
0.832283	0.658685	1.42436	0.458787		0.834598	0.832283	1.52963	1.42436	0.951104	0.658685	1.3052	0.458787		0.655776	0.832283	0.714748	1.42436	0.600291	0.658685	0.538937	0.458787
0.839614	0.658829	1.42815	0.458916		0.836974	0.839614	1.62114	1.42815	0.961927	0.658829	1.36042	0.458916		0.658345	0.839614	0.730331	1.42815	0.615132	0.658829	0.544163	0.458916
0.840831	0.66906	1.44556	0.45994		0.843681	0.840831	1.84422	1.44556	0.965953	0.66906	1.39766	0.45994		0.658999	0.840831	0.734134	1.44556	0.619792	0.66906	0.545906	0.45994
0.842201	0.670616	1.44911	0.46068		0.846267	0.842201	1.91193	1.44911	0.972039	0.670616	2.0911	0.46068		0.660508	0.842201	0.734892	1.44911	0.628338	0.670616	0.551594	0.46068
0.843901	0.67145	1.51143	0.46243		0.848204	0.843901		1.51143	0.974924	0.67145	2.72298	0.46243		0.664039	0.843901	0.735048	1.51143	0.628683	0.67145	0.554904	0.46243
0.881611	0.693055	1.52864	0.466474		0.864198	0.881611		1.52864	0.983775	0.693055		0.466474		0.666667	0.881611	0.737386	1.52864	0.636794	0.693055	0.558044	0.466474
0.883796	0.70011	1.56859	0.470188		0.870541	0.883796		1.56859	0.984233	0.70011		0.470188		0.667109	0.883796	0.740367	1.56859	0.641547	0.70011	0.560319	0.470188
0.897011	0.704212	1.63136	0.474968		0.884658	0.897011		1.63136	0.990035	0.704212		0.474968		0.668375	0.897011	0.757628	1.63136	0.647168	0.704212	0.560914	0.474968
0.913709	0.733596	1.96131	0.484687		0.885332	0.913709		1.96131	1.01485	0.733596		0.484687		0.670932	0.913709	0.766005	1.96131	0.64839	0.733596	0.565177	0.484687
0.947737	0.751862	0.41841	0.491539		0.891945	0.947737		0.41841	1.07116	0.751862		0.491539		0.67286	0.947737	0.769247	0.41841	0.652094	0.751862	0.572465	0.491539
0.954596	0.758382	0.444525	0.493734		0.893961	0.954596		0.444525	1.10297	0.758382		0.493734		0.679712	0.954596	0.772941	0.444525	0.657628	0.758382	0.573579	0.493734
0.978852	0.764018	0.477955	0.498125		0.899204	0.978852		0.477955	1.1663	0.764018		0.498125		0.680327	0.978852	0.774606	0.477955	0.661159	0.764018	0.575276	0.498125
1.00265	0.764219	0.515811	0.50263		0.899518	1.00265		0.515811	1.29178	0.764219		0.50263		0.683818	1.00265	0.787263	0.515811	0.661285	0.764219	0.578262	0.50263
	0.799484	0.542473	0.504781		0.902624			0.542473	1.35214	0.799484		0.504781		0.691795		0.788389	0.542473	0.664159	0.799484	0.580763	0.504781
	0.804661	0.556214	0.506886		0.903101			0.556214	1.4181	0.804661		0.506886		0.692497		0.792619	0.556214	0.665295	0.804661	0.584229	0.506886
	0.805728	0.55874	0.508882		0.909443			0.55874	1.58052	0.805728		0.508882		0.693236		0.793516	0.55874	0.668399	0.805728	0.58455	0.508882
	0.807367	0.560355	0.512385		0.913039			0.560355	0.200023	0.807367		0.512385		0.696339		0.795062	0.560355	0.668929	0.807367	0.586092	0.512385
	0.825863	0.562853	0.513272		0.918578			0.562853	0.264508	0.825863		0.513272		0.699598		0.799362	0.562853	0.674778	0.825863	0.588959	0.513272
	0.834775	0.577277	0.51655		0.921404			0.577277	0.376302	0.834775		0.51655		0.704		0.802923	0.577277	0.680231	0.834775	0.593842	0.51655
	0.841161	0.611645	0.518459		0.923749			0.611645	0.383066	0.841161		0.518459		0.705082		0.806272	0.611645	0.690414	0.841161	0.594693	0.518459
	0.862841	0.614196	0.518519		0.933482			0.614196	0.406148	0.862841		0.518519		0.709412		0.81113	0.614196	0.694309	0.862841	0.595184	0.518519
	0.922382	0.618661	0.520099		0.936456			0.618661	0.437873	0.922382		0.520099		0.724552		0.81147	0.618661	0.695268	0.922382	0.596925	0.520099
	0.938577	0.627322	0.521191		0.937854			0.627322	0.475113	0.938577		0.521191		0.728735		0.816189	0.627322	0.697492	0.938577	0.598523	0.521191
	0.947625	0.632912	0.530889		0.93927			0.632912	0.485086	0.947625		0.530889		0.731464		0.824067	0.632912	0.714381	0.947625	0.60595	0.530889
	0.995228	0.636215	0.534433		0.94397			0.636215	0.490657	0.995228		0.534433		0.737602		0.829527	0.636215	0.715167	0.995228	0.607942	0.534433
		0.649493	0.540064		0.945229			0.649493	0.49111			0.540064		0.739486		0.846293	0.649493	0.716077		0.624998	0.540064
		0.651718	0.541241		0.96788			0.651718	0.502802			0.541241		0.740206		0.846741	0.651718	0.727006		0.625884	0.541241
		0.652905	0.550694		0.973699			0.652905	0.508541			0.550694		0.743274		0.855617	0.652905	0.731293		0.631356	0.550694
		0.667011	0.55268		0.993451			0.667011	0.535404			0.55268		0.744746		0.86187	0.667011	0.732653		0.635149	0.55268
		0.676572	0.553538		1.00134			0.676572	0.554695			0.553538		0.74591		0.882902	0.676572	0.733827		0.636576	0.553538
		0.677199	0.554086		1.00967			0.677199	0.561405			0.554086		0.747109		0.892505	0.677199	0.737941		0.637662	0.554086
		0.677539	0.554311		1.01662			0.677539	0.564875			0.554311		0.751655		0.895386	0.677539	0.743437		0.640034	0.554311
		0.678433	0.555031		1.01989			0.678433	0.578012			0.555031		0.752346		0.904175	0.678433	0.747612		0.645965	0.555031
		0.681148	0.557323		1.0231			0.681148	0.58478			0.557323		0.75496		0.90551	0.681148	0.749079		0.648526	0.557323
		0.686595	0.55823		1.02372			0.686595	0.586561			0.55823		0.761893		0.908557	0.686595	0.750998		0.648542	0.55823
		0.686977	0.563327		1.03268			0.686977	0.590862			0.563327		0.762331		0.910501	0.686977	0.754855		0.661213	0.563327
		0.689044	0.5635		1.0347			0.689044	0.596806			0.5635		0.764958		0.926221	0.689044	0.755219		0.66365	0.5635
		0.695504	0.569142		1.96479			0.695504	0.600006			0.569142		0.766879		0.928182	0.695504	0.76256		0.665387	0.569142
		0.697085	0.571024		0.426166			0.697085	0.604712			0.571024		0.769		0.9312	0.697085	0.770767		0.665807	0.571024
		0.698736	0.571978		0.439174			0.698736	0.607435			0.571978		0.770933		0.936882	0.698736	0.771386		0.672289	0.571978
		0.699609	0.573301		0.803334			0.699609	0.615741			0.573301		0.784564		0.936884	0.699609	0.775662		0.67637	0.573301
		0.701546	0.573333		0.85594			0.701546	0.619314			0.573333		0.799464		0.938821	0.701546	0.778268		0.680214	0.573333
		0.701847	0.575516		0.9115			0.701847	0.625751			0.575516		0.803341		0.943882	0.701847	0.781659		0.682124	0.575516
		0.704114	0.578598		0.405679			0.704114	0.629663			0.578598		0.812487		0.946554	0.704114	0.784807		0.690604	0.578598
		0.708928	0.579312		0.417144			0.708928	0.633811			0.579312		0.813975		0.951271	0.708928	0.790952		0.690922	0.579312
		0.710584	0.583151		0.438523			0.710584	0.633826			0.583151		0.827737		0.959283	0.710584	0.795554		0.691012	0.583151
		0.716026	0.583905		0.446342			0.716026	0.636791			0.583905		0.829173		0.95932	0.716026	0.797161		0.691424	0.583905
		0.718544	0.584455		0.448535			0.718544	0.637498			0.584455		0.830296		0.963136	0.718544	0.798538		0.692678	0.584455
		0.721932	0.585524		0.460718			0.721932	0.642231			0.585524		0.831959		0.975534	0.721932	0.80946		0.702661	0.585524
		0.722802	0.586939		0.472323			0.722802	0.648159			0.586939		0.83546		0.97815	0.722802	0.809695		0.703578	0.586939
		0.723376	0.588299		0.480944			0.723376	0.662766			0.588299		0.836175		0.978558	0.723376	0.831486		0.703832	0.588299
		0.723894	0.590016		0.49632			0.723894	0.66509			0.590016		0.839871		0.978566	0.723894	0.835992		0.709922	0.590016
		0.727492	0.59003		0.499979			0.727492	0.66667			0.59003		0.847683		0.982774	0.727492	0.840396		0.712136	0.59003
		0.72963	0.596125		0.511332			0.72963	0.671777			0.596125		0.863952		0.984836	0.72963	0.840536		0.719446	0.596125
		0.738978	0.596904		0.517723			0.738978	0.684397			0.596904		0.86634		0.992173	0.738978	0.843421		0.720557	0.596904
		0.740341	0.597092		0.527435			0.740341	0.6858			0.597092		0.870526		0.993268	0.740341	0.84979		0.721852	0.597092
		0.747309	0.597339		0.536546			0.747309	0.685883			0.597339		0.885994		0.994249	0.747309	0.855766		0.724435	0.597339
		0.752195	0.597563		0.538385			0.752195	0.690901			0.597563		0.886304		1.01429	0.752195	0.859604		0.726396	0.597563
		0.759561	0.598621		0.546425			0.759561	0.695903			0.598621		0.887521		1.01854	0.759561	0.859704		0.728777	0.598621
		0.761055	0.598998		0.549494			0.761055	0.695985			0.598998		0.911466		1.03394	0.761055	0.860694		0.733615	0.598998
		0.763737	0.600011		0.550915			0.763737	0.69619			0.600011		0.9133		1.12149	0.763737	0.863932		0.73596	0.600011
		0.770418	0.60073		0.559153			0.770418	0.701439			0.60073		0.915031		0.490966	0.770418	0.875891		0.737189	0.60073
		0.773914	0.600904		0.559463			0.773914	0.701463			0.600904		0.920663		0.490975	0.773914	0.883801		0.737739	0.600904
		0.774566	0.60307		0.562539			0.774566	0.705204			0.60307		0.926143		0.491398	0.774566	0.88458		0.738485	0.60307
		0.777909	0.603179		0.562572			0.777909	0.705584			0.603179		0.928489		0.495873	0.777909	0.885293		0.745708	0.603179
		0.793667	0.603929		0.56435			0.793667	0.707803			0.603929		0.930071		0.509964	0.793667	0.888783		0.746143	0.603929
		0.794515	0.605296		0.57173			0.794515	0.711418			0.605296		0.936091		0.531961	0.794515	0.891853		0.74753	0.605296
		0.795451	0.605633		0.572044			0.795451	0.713833			0.605633		0.95407		0.534542	0.795451	0.904485		0.769862	0.605633
		0.79643	0.605897		0.577238			0.79643	0.718961			0.605897		0.957933		0.556627	0.79643	0.908081		0.775558	0.605897
		0.797207	0.606553		0.578846			0.797207	0.724188			0.606553		0.968036		0.559114	0.797207	0.921177		0.775934	0.606553
		0.809781	0.608003		0.579126			0.809781	0.724757			0.608003		0.982557		0.561226	0.809781	0.926627		0.783503	0.608003
		0.809812	0.61024		0.581256			0.809812	0.727167			0.61024		0.984063		0.561996	0.809812	0.937336		0.784726	0.61024
		0.811571	0.610273		0.582723			0.811571	0.728566			0.610273		0.998917		0.564954	0.811571	0.940004		0.78642	0.610273
		0.812032	0.61174		0.587286			0.812032	0.729034			0.61174		1.03467		0.577104	0.812032	0.942376		0.786671	0.61174
		0.812789	0.612937		0.5916			0.812789	0.73185			0.612937		1.04215		0.579964	0.812789	0.949445		0.787056	0.612937
		0.813337	0.613526		0.593824			0.813337	0.740555			0.613526		1.05187		0.58068	0.813337	0.954682		0.79879	0.613526
		0.817066	0.615043		0.593849			0.817066	0.741617			0.615043		1.05198		0.581377	0.817066	0.991658		0.802654	0.615043
		0.824994	0.617392		0.595096			0.824994	0.745529			0.617392		1.06827		0.588483	0.824994	0.995934		0.80522	0.617392
		0.832389	0.619886		0.600396			0.832389	0.74877			0.619886		1.08523		0.590682	0.832389	1.01695		0.814358	0.619886
		0.832514	0.620843		0.615174			0.832514	0.749718			0.620843		0.322967		0.591242	0.832514	1.02044		0.82189	0.620843
		0.838134	0.621208		0.616604			0.838134	0.751859			0.621208		0.401687		0.596463	0.838134	1.02577		0.823143	0.621208
		0.838154	0.621816		0.618415			0.838154	0.753743			0.621816		0.440349		0.597573	0.838154	1.03207		0.828833	0.621816
		0.838715	0.622033		0.619856			0.838715	0.760185			0.622033		0.441031		0.601867	0.838715	1.03454		0.83328	0.622033
		0.841845	0.622463		0.620082			0.841845	0.761461			0.622463		0.458359		0.61429	0.841845	1.10735		0.83399	0.622463
		0.844569	0.62267		0.632914			0.844569	0.761558			0.62267		0.464223		0.623691	0.844569	0.203608		0.842788	0.62267
		0.846293	0.624076		0.633965			0.846293	0.762144			0.624076		0.468225		0.625433	0.846293	0.206092		0.84331	0.624076
		0.847461	0.625752		0.639413			0.847461	0.765091			0.625752		0.50685		0.628076	0.847461	0.290554		0.848074	0.625752
		0.848236	0.625849		0.639853			0.848236	0.769377			0.625849		0.508639		0.633709	0.848236	0.311439		0.850548	0.625849
		0.848833	0.626199		0.640604			0.848833	0.77499			0.626199		0.525814		0.641062	0.848833	0.363462		0.858737	0.626199
		0.849848	0.631363		0.654779			0.849848	0.782902			0.631363		0.527626		0.64751	0.849848	0.398215		0.869588	0.631363
		0.851834	0.63238		0.661577			0.851834	0.784102			0.63238		0.528988		0.648188	0.851834	0.417407		0.882498	0.63238
		0.854704	0.633543		0.662715			0.854704	0.7867			0.633543		0.533498		0.657172	0.854704	0.421926		0.891009	0.633543
		0.858571	0.634597		0.666652			0.858571	0.787199			0.634597		0.534181		0.657638	0.858571	0.466381		0.911429	0.634597
		0.858625	0.634689		0.668262			0.858625	0.79732			0.634689		0.543594		0.666684	0.858625	0.467522		0.922296	0.634689
		0.860244	0.636516		0.670408			0.860244	0.805118			0.636516		0.543732		0.678634	0.860244	0.483522		0.952771	0.636516
		0.861763	0.63862		0.672736			0.861763	0.807215			0.63862		0.545114		0.683336	0.861763	0.491123		0.962777	0.63862
		0.863625	0.639892		0.675342			0.863625	0.807641			0.639892		0.546898		0.689431	0.863625	0.496463		0.990269	0.639892
		0.865567	0.640138		0.677733			0.865567	0.811			0.640138		0.548392		0.701882	0.865567	0.509407		0.993144	0.640138
		0.865575	0.641118		0.691828			0.865575	0.811832			0.641118		0.550076		0.70585	0.865575	0.51074		0.993144	0.641118
		0.867331	0.64192		0.69245			0.867331	0.812032			0.64192		0.566885		0.706105	0.867331	0.520568		0.99492	0.64192
		0.868236	0.642592		0.697679			0.868236	0.81773			0.642592		0.57177		0.710077	0.868236	0.539021		1.02965	0.642592
		0.868275	0.644198		0.697754			0.868275	0.823322			0.644198		0.577616		0.711133	0.868275	0.547146		1.05162	0.644198
		0.871051	0.64436		0.700806			0.871051	0.845433			0.64436		0.578661		0.714575	0.871051	0.548851		1.0642	0.64436
		0.871952	0.646576		0.703412			0.871952	0.861195			0.646576		0.579506		0.731149	0.871952	0.550896		1.08914	0.646576
		0.872696	0.647981		0.707827			0.872696	0.870243			0.647981		0.587763		0.733281	0.872696	0.552373		1.09557	0.647981
		0.873017	0.648046		0.710207			0.873017	0.872114			0.648046		0.588153		0.737849	0.873017	0.575098		1.12339	0.648046
		0.873335	0.648838		0.713792			0.873335	0.873481			0.648838		0.592845		0.749704	0.873335	0.584375		1.19627	0.648838
		0.874737	0.650491		0.726103			0.874737	0.893453			0.650491		0.594047		0.750004	0.874737	0.588219		1.58346	0.650491
		0.875904	0.650661		0.730113			0.875904	0.915805			0.650661		0.596287		0.753215	0.875904	0.595108		0.180296	0.650661
		0.877254	0.65137		0.731382			0.877254	0.931373			0.65137		0.599597		0.759861	0.877254	0.604458		0.255436	0.65137
		0.878391	0.651612		0.73299			0.878391	0.935496			0.651612		0.601627		0.760887	0.878391	0.609612		0.318205	0.651612
		0.880993	0.65253		0.733975			0.880993	0.947429			0.65253		0.605117		0.760897	0.880993	0.614825		0.328028	0.65253
		0.882867	0.654927		0.734507			0.882867	0.948137			0.654927		0.614071		0.761856	0.882867	0.615665		0.396871	0.654927
		0.884388	0.656543		0.737314			0.884388	0.967857			0.656543		0.626376		0.763572	0.884388	0.617405		0.432346	0.656543
		0.884881	0.657161		0.737647			0.884881	1.0023			0.657161		0.626664		0.78071	0.884881	0.617413		0.456714	0.657161
		0.885105	0.658068		0.739523			0.885105	1.10613			0.658068		0.630563		0.781872	0.885105	0.624868		0.469407	0.658068
		0.891809	0.659283		0.741493			0.891809	1.26793			0.659283		0.6326		0.782787	0.891809	0.629859		0.481237	0.659283
		0.892101	0.660003		0.747797			0.892101	0.255736			0.660003		0.637449		0.78824	0.892101	0.630659		0.489301	0.660003
		0.892119	0.661495		0.754943			0.892119	0.535642			0.661495		0.638589		0.799679	0.892119	0.633167		0.489702	0.661495
		0.89245	0.661763		0.774863			0.89245	0.53654			0.661763		0.651687		0.803987	0.89245	0.633225		0.49804	0.661763
		0.895748	0.662242		0.776274			0.895748	0.561717			0.662242		0.653404		0.807088	0.895748	0.637273		0.50214	0.662242
		0.89789	0.662547		0.776779			0.89789	0.575884			0.662547		0.653849		0.81016	0.89789	0.637587		0.507653	0.662547
		0.89847	0.664424		0.784161			0.89847	0.576128			0.664424		0.654734		0.828239	0.89847	0.641521		0.509538	0.664424
		0.901709	0.665999		0.788107			0.901709	0.587259			0.665999		0.654752		0.833316	0.901709	0.645822		0.511243	0.665999
		0.901805	0.668591		0.792			0.901805	0.591139			0.668591		0.655913		0.833323	0.901805	0.646052		0.521578	0.668591
		0.909447	0.668727		0.79296			0.909447	0.604736			0.668727		0.658035		0.838542	0.909447	0.657333		0.524803	0.668727
		0.910022	0.670614		0.798797			0.910022	0.608769			0.670614		0.659097		0.853325	0.910022	0.658035		0.530534	0.670614
		0.910882	0.675156		0.801401			0.910882	0.630136			0.675156		0.661107		0.859221	0.910882	0.660474		0.536727	0.675156
		0.913569	0.676281		0.802529			0.913569	0.647622			0.676281		0.661518		0.863856	0.913569	0.665082		0.542672	0.676281
		0.914275	0.676957		0.805391			0.914275	0.731337			0.676957		0.664054		0.865926	0.914275	0.666185		0.546182	0.676957
		0.917941	0.679156		0.810244			0.917941	0.741096			0.679156		0.671062		0.868175	0.917941	0.679916		0.546949	0.679156
		0.921252	0.679182		0.811125			0.921252	0.751966			0.679182		0.674646		0.869539	0.921252	0.695601		0.547088	0.679182
		0.923205	0.679715		0.813669			0.923205	0.779058			0.679715		0.67686		0.874413	0.923205	0.701934		0.547132	0.679715
		0.923476	0.680652		0.826498			0.923476	0.785084			0.680652		0.682959		0.883951	0.923476	0.706609		0.568778	0.680652
		0.924964	0.6857		0.827303			0.924964	0.866307			0.6857		0.685057		0.88412	0.924964	0.707637		0.568953	0.6857
		0.925274	0.687136		0.830393			0.925274	0.885409			0.687136		0.685878		0.891093	0.925274	0.715782		0.584726	0.687136
		0.925534	0.687739		0.831553			0.925534	0.917482			0.687739		0.688133		0.89369	0.925534	0.724086		0.587833	0.687739
		0.926889	0.689046		0.831601			0.926889	0.961865			0.689046		0.691651		0.912712	0.926889	0.729		0.58965	0.689046
		0.92693	0.691925		0.850212			0.92693	0.974278			0.691925		0.695737		0.912718	0.92693	0.732458		0.605309	0.691925
		0.928361	0.695718		0.85651			0.928361				0.695718		0.700069		0.92232	0.928361	0.733936		0.608467	0.695718
		0.928491	0.696563		0.859245			0.928491				0.696563		0.700915		0.931188	0.928491	0.73579		0.616691	0.696563
		0.929331	0.698256		0.859279			0.929331				0.698256		0.702661		0.93273	0.929331	0.73818		0.6193	0.698256
		0.931721	0.699306		0.861711			0.931721				0.699306		0.704608		0.934644	0.931721	0.740151		0.627445	0.699306
		0.932523	0.699827		0.868423			0.932523				0.699827		0.704909		0.936965	0.932523	0.745252		0.629747	0.699827
		0.933279	0.700512		0.871524			0.933279				0.700512		0.709771		0.945589	0.933279	0.746007		0.630463	0.700512
		0.933706	0.700549		0.878225			0.933706				0.700549		0.714617		0.94658	0.933706	0.750584		0.630572	0.700549
		0.934981	0.703362		0.879162			0.934981				0.703362		0.718739		0.956342	0.934981	0.752597		0.633596	0.703362
		0.935248	0.70374		0.880152			0.935248				0.70374		0.718803		0.956342	0.935248	0.753179		0.63528	0.70374
		0.937907	0.704515		0.925706			0.937907				0.704515		0.720461		0.980601	0.937907	0.754609		0.637577	0.704515
		0.938259	0.705626		0.927245			0.938259				0.705626		0.725613		0.9815	0.938259	0.760684		0.641012	0.705626
		0.939067	0.70612		0.927654			0.939067				0.70612		0.727801		0.982672	0.939067	0.765468		0.641718	0.70612
		0.939813	0.706388		0.933507			0.939813				0.706388		0.733703		0.982792	0.939813	0.770393		0.643385	0.706388
		0.941632	0.707451		0.938946			0.941632				0.707451		0.737618		0.982949	0.941632	0.770475		0.649298	0.707451
		0.94463	0.707938		0.9407			0.94463				0.707938		0.742632		0.993795	0.94463	0.77155		0.650324	0.707938
		0.947627	0.708754		0.949772			0.947627				0.708754		0.744618		0.995852	0.947627	0.774306		0.654664	0.708754
		0.94769	0.709082		0.958892			0.94769				0.709082		0.750775		1.00214	0.94769	0.775366		0.65853	0.709082
		0.94788	0.709602		0.963432			0.94788				0.709602		0.754669		1.01311	0.94788	0.775826		0.661442	0.709602
		0.950869	0.711562		0.969458			0.950869				0.711562		0.757197		1.02731	0.950869	0.779169		0.662489	0.711562
		0.955057	0.713519		0.971184			0.955057				0.713519		0.759442		1.03765	0.955057	0.78397		0.665477	0.713519
		0.961091	0.714283		0.985267			0.961091				0.714283		0.759782		1.0569	0.961091	0.784816		0.667593	0.714283
		0.963946	0.714543		1.001			0.963946				0.714543		0.769765		1.11342	0.963946	0.784999		0.66836	0.714543
		0.964543	0.714989		1.00582			0.964543				0.714989		0.774623		1.22473	0.964543	0.785317		0.669908	0.714989
		0.965168	0.715867		1.02833			0.965168				0.715867		0.775035		1.25462	0.965168	0.786911		0.67675	0.715867
		0.966811	0.716357		0.413789			0.966811				0.716357		0.776469			0.966811	0.790216		0.680312	0.716357
		0.968009	0.717106		0.482164			0.968009				0.717106		0.780682			0.968009	0.791945		0.685	0.717106
		0.969641	0.719072		0.627778			0.969641				0.719072		0.784148			0.969641	0.792134		0.685106	0.719072
		0.969961	0.719664		0.651222			0.969961				0.719664		0.788274			0.969961	0.797129		0.696271	0.719664
		0.970774	0.721885		0.701307			0.970774				0.721885		0.795233			0.970774	0.800474		0.697117	0.721885
		0.971323	0.721939		0.716332			0.971323				0.721939		0.798466			0.971323	0.802732		0.701486	0.721939
		0.971929	0.723502		0.743356			0.971929				0.723502		0.801649			0.971929	0.80639		0.702322	0.723502
		0.972123	0.7244		0.852575			0.972123				0.7244		0.811088			0.972123	0.809804		0.702981	0.7244
		0.974028	0.724916		0.862936			0.974028				0.724916		0.813575			0.974028	0.813559		0.706425	0.724916
		0.974153	0.731345		0.894306			0.974153				0.731345		0.823616			0.974153	0.818121		0.723593	0.731345
		0.978736	0.732374		0.933315			0.978736				0.732374		0.826894			0.978736	0.81899		0.737506	0.732374
		0.981506	0.732944		0.957754			0.981506				0.732944		0.836235			0.981506	0.820983		0.741384	0.732944
		0.982245	0.733688		0.963147			0.982245				0.733688		0.839391			0.982245	0.821592		0.747632	0.733688
		0.982297	0.734204		0.976432			0.982297				0.734204		0.848918			0.982297	0.825328		0.748836	0.734204
		0.982544	0.734917		1.18035			0.982544				0.734917		0.86194			0.982544	0.838147		0.752895	0.734917
		0.983541	0.737153					0.983541				0.737153		0.867236			0.983541	0.839271		0.753412	0.737153
		0.98556	0.741584					0.98556				0.741584		0.86764			0.98556	0.841402		0.754368	0.741584
		0.987915	0.743038					0.987915				0.743038		0.868657			0.987915	0.844337		0.767188	0.743038
		0.988523	0.743877					0.988523				0.743877		0.869384			0.988523	0.85246		0.767264	0.743877
		0.990271	0.74441					0.990271				0.74441		0.886672			0.990271	0.861535		0.777059	0.74441
		0.992338	0.745043					0.992338				0.745043		0.90031			0.992338	0.865282		0.778082	0.745043
		0.992686	0.745136					0.992686				0.745136		0.915343			0.992686	0.874116		0.798061	0.745136
		0.996096	0.746314					0.996096				0.746314		0.922963			0.996096	0.876226		0.809268	0.746314
		0.996492	0.748338					0.996492				0.748338		0.93592			0.996492	0.878513		0.817029	0.748338
		1	0.749215					1				0.749215		0.94322			1	0.88195		0.820311	0.749215
		1	0.750006					1				0.750006		0.952085			1	0.898487		0.821331	0.750006
		1.00323	0.750632					1.00323				0.750632		0.964013			1.00323	0.900768		0.825291	0.750632
		1.00725	0.751299					1.00725				0.751299		0.972902			1.00725	0.933416		0.825735	0.751299
		1.01181	0.751542					1.01181				0.751542		0.977999			1.01181	0.933563		0.832789	0.751542
		1.01186	0.753722					1.01186				0.753722		0.98138			1.01186	0.937102		0.844497	0.753722
		1.0134	0.75529					1.0134				0.75529		0.983461			1.0134	0.94168		0.845752	0.75529
		1.01402	0.755981					1.01402				0.755981		0.994371			1.01402	0.943522		0.852818	0.755981
		1.01592	0.757352					1.01592				0.757352		0.999594			1.01592	0.951475		0.853665	0.757352
		1.01597	0.759175					1.01597				0.759175		1.00113			1.01597	0.960025		0.871497	0.759175
		1.01643	0.759421					1.01643				0.759421		1.00303			1.01643	0.974546		0.885729	0.759421
		1.01667	0.76007					1.01667				0.76007		1.01144			1.01667	0.974664		0.898137	0.76007
		1.01694	0.760942					1.01694				0.760942		1.01436			1.01694	1		0.901788	0.760942
		1.02109	0.761929					1.02109				0.761929		1.09068			1.02109	1.00523		0.903066	0.761929
		1.02279	0.762913					1.02279				0.762913		1.09774			1.02279	1.01543		0.909086	0.762913
		1.02284	0.764951					1.02284				0.764951		1.10442			1.02284	1.04388		0.913601	0.764951
		1.02605	0.765427					1.02605				0.765427		1.12414			1.02605	1.0777		0.923981	0.765427
		1.02633	0.767988					1.02633				0.767988		1.14398			1.02633	1.11088		0.929643	0.767988
		1.02634	0.769784					1.02634				0.769784					1.02634	1.13687		0.932765	0.769784
		1.02689	0.769801					1.02689				0.769801					1.02689			0.938676	0.769801
		1.0279	0.770528					1.0279				0.770528					1.0279			0.950762	0.770528
		1.03101	0.775061					1.03101				0.775061					1.03101			0.953251	0.775061
		1.03182	0.778836					1.03182				0.778836					1.03182			0.954232	0.778836
		1.03473	0.778968					1.03473				0.778968					1.03473			0.964894	0.778968
		1.03473	0.780552					1.03473				0.780552					1.03473			0.988408	0.780552
		1.03589	0.781685					1.03589				0.781685					1.03589			1.00463	0.781685
		1.03593	0.781922					1.03593				0.781922					1.03593			1.05315	0.781922
		1.03734	0.782754					1.03734				0.782754					1.03734			1.07279	0.782754
		1.04018	0.783056					1.04018				0.783056					1.04018			1.37532	0.783056
		1.04128	0.784546					1.04128				0.784546					1.04128				0.784546
		1.04152	0.786213					1.04152				0.786213					1.04152				0.786213
		1.04268	0.786387					1.04268				0.786387					1.04268				0.786387
		1.04549	0.7869					1.04549				0.7869					1.04549				0.7869
		1.04902	0.786967					1.04902				0.786967					1.04902				0.786967
		1.04999	0.787342					1.04999				0.787342					1.04999				0.787342
		1.05057	0.78978					1.05057				0.78978					1.05057				0.78978
		1.05264	0.79142					1.05264				0.79142					1.05264				0.79142
		1.05421	0.792668					1.05421				0.792668					1.05421				0.792668
		1.05611	0.793076					1.05611				0.793076					1.05611				0.793076
		1.05692	0.796113					1.05692				0.796113					1.05692				0.796113
		1.05846	0.79648					1.05846				0.79648					1.05846				0.79648
		1.05856	0.798505					1.05856				0.798505					1.05856				0.798505
		1.06088	0.798564					1.06088				0.798564					1.06088				0.798564
		1.06165	0.800321					1.06165				0.800321					1.06165				0.800321
		1.06208	0.800845					1.06208				0.800845					1.06208				0.800845
		1.06277	0.801951					1.06277				0.801951					1.06277				0.801951
		1.06674	0.803008					1.06674				0.803008					1.06674				0.803008
		1.06933	0.804832					1.06933				0.804832					1.06933				0.804832
		1.07611	0.809533					1.07611				0.809533					1.07611				0.809533
		1.07713	0.809793					1.07713				0.809793					1.07713				0.809793
		1.07834	0.812654					1.07834				0.812654					1.07834				0.812654
		1.08007	0.816085					1.08007				0.816085					1.08007				0.816085
		1.08032	0.818692					1.08032				0.818692					1.08032				0.818692
		1.08254	0.818962					1.08254				0.818962					1.08254				0.818962
		1.08612	0.820065					1.08612				0.820065					1.08612				0.820065
		1.08616	0.820157					1.08616				0.820157					1.08616				0.820157
		1.08646	0.821311					1.08646				0.821311					1.08646				0.821311
		1.08705	0.821424					1.08705				0.821424					1.08705				0.821424
		1.09043	0.821819					1.09043				0.821819					1.09043				0.821819
		1.09499	0.822221					1.09499				0.822221					1.09499				0.822221
		1.0971	0.826147					1.0971				0.826147					1.0971				0.826147
		1.09769	0.826379					1.09769				0.826379					1.09769				0.826379
		1.09773	0.828395					1.09773				0.828395					1.09773				0.828395
		1.09945	0.833342					1.09945				0.833342					1.09945				0.833342
		1.10153	0.833844					1.10153				0.833844					1.10153				0.833844
		1.10365	0.834564					1.10365				0.834564					1.10365				0.834564
		1.10427	0.839586					1.10427				0.839586					1.10427				0.839586
		1.10439	0.84645					1.10439				0.84645					1.10439				0.84645
		1.10632	0.846726					1.10632				0.846726					1.10632				0.846726
		1.10774	0.848609					1.10774				0.848609					1.10774				0.848609
		1.10781	0.852757					1.10781				0.852757					1.10781				0.852757
		1.1079	0.854036					1.1079				0.854036					1.1079				0.854036
		1.10827	0.857696					1.10827				0.857696					1.10827				0.857696
		1.10991	0.859219					1.10991				0.859219					1.10991				0.859219
		1.11112	0.861543					1.11112				0.861543					1.11112				0.861543
		1.12049	0.863083					1.12049				0.863083					1.12049				0.863083
		1.12073	0.863978					1.12073				0.863978					1.12073				0.863978
		1.12447	0.872646					1.12447				0.872646					1.12447				0.872646
		1.12546	0.875952					1.12546				0.875952					1.12546				0.875952
		1.12704	0.878158					1.12704				0.878158					1.12704				0.878158
		1.12873	0.890083					1.12873				0.890083					1.12873				0.890083
		1.12874	0.891573					1.12874				0.891573					1.12874				0.891573
		1.12895	0.89447					1.12895				0.89447					1.12895				0.89447
		1.13213	0.905502					1.13213				0.905502					1.13213				0.905502
		1.13258	0.906399					1.13258				0.906399					1.13258				0.906399
		1.13689	0.907317					1.13689				0.907317					1.13689				0.907317
		1.1434	0.907498					1.1434				0.907498					1.1434				0.907498
		1.14519	0.915202					1.14519				0.915202					1.14519				0.915202
		1.14907	0.920133					1.14907				0.920133					1.14907				0.920133
		1.15315	0.922957					1.15315				0.922957					1.15315				0.922957
		1.15625	0.92512					1.15625				0.92512					1.15625				0.92512
		1.16977	0.925179					1.16977				0.925179					1.16977				0.925179
		1.17067	0.927181					1.17067				0.927181					1.17067				0.927181
		1.17113	0.927499					1.17113				0.927499					1.17113				0.927499
		1.17433	0.928646					1.17433				0.928646					1.17433				0.928646
		1.17638	0.930892					1.17638				0.930892					1.17638				0.930892
		1.17655	0.935966					1.17655				0.935966					1.17655				0.935966
		1.18091	0.939752					1.18091				0.939752					1.18091				0.939752
		1.18603	0.948675					1.18603				0.948675					1.18603				0.948675
		1.18864	0.952368					1.18864				0.952368					1.18864				0.952368
		1.20821	0.953514					1.20821				0.953514					1.20821				0.953514
		1.2089	0.956887					1.2089				0.956887					1.2089				0.956887
		1.21465	0.961109					1.21465				0.961109					1.21465				0.961109
		1.2176	0.967347					1.2176				0.967347					1.2176				0.967347
		1.21957	0.9736					1.21957				0.9736					1.21957				0.9736
		1.22007	0.975457					1.22007				0.975457					1.22007				0.975457
		1.22116	0.991377					1.22116				0.991377					1.22116				0.991377
		1.22198	0.992016					1.22198				0.992016					1.22198				0.992016
		1.2291	1					1.2291				1					1.2291				1
		1.23352	1.00536					1.23352				1.00536					1.23352				1.00536
		1.23507	1.00946					1.23507				1.00946					1.23507				1.00946
		1.23566	1.01589					1.23566				1.01589					1.23566				1.01589
		1.23929	1.01802					1.23929				1.01802					1.23929				1.01802
		1.24474	1.02203					1.24474				1.02203					1.24474				1.02203
		1.25036	1.02449					1.25036				1.02449					1.25036				1.02449
		1.2566	1.0398					1.2566				1.0398					1.2566				1.0398
		1.25736	1.11811					1.25736				1.11811					1.25736				1.11811
		1.26215	1.17461					1.26215				1.17461					1.26215				1.17461
		1.26282	1.39003					1.26282				1.39003					1.26282				1.39003
		1.26317	0.415872					1.26317				0.415872					1.26317				0.415872
		1.26634	0.490061					1.26634				0.490061					1.26634				0.490061
		1.28017	0.510308					1.28017				0.510308					1.28017				0.510308
		1.28026	0.518039					1.28026				0.518039					1.28026				0.518039
		1.28201	0.520745					1.28201				0.520745					1.28201				0.520745
		1.28248	0.533734					1.28248				0.533734					1.28248				0.533734
		1.2837	0.534215					1.2837				0.534215					1.2837				0.534215
		1.28635	0.548243					1.28635				0.548243					1.28635				0.548243
		1.28715	0.559434					1.28715				0.559434					1.28715				0.559434
		1.29502	0.560779					1.29502				0.560779					1.29502				0.560779
		1.2962	0.564678					1.2962				0.564678					1.2962				0.564678
		1.30161	0.570403					1.30161				0.570403					1.30161				0.570403
		1.30641	0.585115					1.30641				0.585115					1.30641				0.585115
		1.30754	0.592391					1.30754				0.592391					1.30754				0.592391
		1.32541	0.596696					1.32541				0.596696					1.32541				0.596696
		1.32813	0.597961					1.32813				0.597961					1.32813				0.597961
		1.33356	0.600677					1.33356				0.600677					1.33356				0.600677
		1.33618	0.601864					1.33618				0.601864					1.33618				0.601864
		1.33641	0.607434					1.33641				0.607434					1.33641				0.607434
		1.33887	0.608906					1.33887				0.608906					1.33887				0.608906
		1.35689	0.612695					1.35689				0.612695					1.35689				0.612695
		1.36311	0.616134					1.36311				0.616134					1.36311				0.616134
		1.36943	0.620324					1.36943				0.620324					1.36943				0.620324
		1.37622	0.621724					1.37622				0.621724					1.37622				0.621724
		1.37816	0.626176					1.37816				0.626176					1.37816				0.626176
		1.3786	0.62662					1.3786				0.62662					1.3786				0.62662
		1.38005	0.627332					1.38005				0.627332					1.38005				0.627332
		1.38455	0.629964					1.38455				0.629964					1.38455				0.629964
		1.43378	0.640044					1.43378				0.640044					1.43378				0.640044
		1.45202	0.655484					1.45202				0.655484					1.45202				0.655484
		1.46181	0.658589					1.46181				0.658589					1.46181				0.658589
		1.47376	0.660398					1.47376				0.660398					1.47376				0.660398
		1.47625	0.661831					1.47625				0.661831					1.47625				0.661831
		1.54202	0.663401					1.54202				0.663401					1.54202				0.663401
		1.54905	0.673757					1.54905				0.673757					1.54905				0.673757
		1.5841	0.67393					1.5841				0.67393					1.5841				0.67393
		1.70882	0.676392					1.70882				0.676392					1.70882				0.676392
		1.71958	0.677268					1.71958				0.677268					1.71958				0.677268
		1.74142	0.682033					1.74142				0.682033					1.74142				0.682033
		1.77579	0.690686					1.77579				0.690686					1.77579				0.690686
		1.80542	0.695039					1.80542				0.695039					1.80542				0.695039
		0.760525	0.705091					0.760525				0.705091					0.760525				0.705091
		0.854699	0.707007					0.854699				0.707007					0.854699				0.707007
		0.878361	0.709718					0.878361				0.709718					0.878361				0.709718
		0.906642	0.734652					0.906642				0.734652					0.906642				0.734652
		0.907459	0.757412					0.907459				0.757412					0.907459				0.757412
		0.929259	0.778914					0.929259				0.778914					0.929259				0.778914
		0.941749	0.782491					0.941749				0.782491					0.941749				0.782491
		0.967145	0.782753					0.967145				0.782753					0.967145				0.782753
		0.971567	0.784786					0.971567				0.784786					0.971567				0.784786
		0.98026	0.795235					0.98026				0.795235					0.98026				0.795235
		1.00712	0.816156					1.00712				0.816156					1.00712				0.816156
		1.0075	0.818894					1.0075				0.818894					1.0075				0.818894
		1.0091	0.822934					1.0091				0.822934					1.0091				0.822934
		1.03381	0.827604					1.03381				0.827604					1.03381				0.827604
		1.04588	0.833061					1.04588				0.833061					1.04588				0.833061
		1.05026	0.833526					1.05026				0.833526					1.05026				0.833526
		1.05083	0.837873					1.05083				0.837873					1.05083				0.837873
		1.06164	0.847284					1.06164				0.847284					1.06164				0.847284
		1.06282	0.850718					1.06282				0.850718					1.06282				0.850718
		1.07351	0.851685					1.07351				0.851685					1.07351				0.851685
		1.08903	0.867887					1.08903				0.867887					1.08903				0.867887
		1.09872	0.868705					1.09872				0.868705					1.09872				0.868705
		1.09984	0.874878					1.09984				0.874878					1.09984				0.874878
		1.10043	0.879578					1.10043				0.879578					1.10043				0.879578
		1.11728	0.879712					1.11728				0.879712					1.11728				0.879712
		1.12334	0.881667					1.12334				0.881667					1.12334				0.881667
		1.1333	0.882057					1.1333				0.882057					1.1333				0.882057
		1.1422	0.882135					1.1422				0.882135					1.1422				0.882135
		1.14761	0.885647					1.14761				0.885647					1.14761				0.885647
		1.16143	0.892006					1.16143				0.892006					1.16143				0.892006
		1.17289	0.916212					1.17289				0.916212					1.17289				0.916212
		1.18636	0.922969					1.18636				0.922969					1.18636				0.922969
		1.18764	0.932592					1.18764				0.932592					1.18764				0.932592
		1.18796	0.935321					1.18796				0.935321					1.18796				0.935321
		1.1953	0.945235					1.1953				0.945235					1.1953				0.945235
		1.20395	0.959693					1.20395				0.959693					1.20395				0.959693
		1.21479	0.975547					1.21479				0.975547					1.21479				0.975547
		1.22345	0.997319					1.22345				0.997319					1.22345				0.997319
		1.22628	1.01809					1.22628				1.01809					1.22628				1.01809
		1.23326	1.04253					1.23326				1.04253					1.23326				1.04253
		1.26502	1.06988					1.26502				1.06988					1.26502				1.06988
		1.27298	0.403929					1.27298				0.403929					1.27298				0.403929
		1.27631	0.476075					1.27631				0.476075					1.27631				0.476075
		1.28055	0.479175					1.28055				0.479175					1.28055				0.479175
		1.3002	0.503791					1.3002				0.503791					1.3002				0.503791
		1.32557	0.511766					1.32557				0.511766					1.32557				0.511766
		1.33047	0.525661					1.33047				0.525661					1.33047				0.525661
		1.40977	0.53913					1.40977				0.53913					1.40977				0.53913
		1.41993	0.540902					1.41993				0.540902					1.41993				0.540902
		1.42737	0.546129					1.42737				0.546129					1.42737				0.546129
		1.45638	0.547309					1.45638				0.547309					1.45638				0.547309
		1.4661	0.550535					1.4661				0.550535					1.4661				0.550535
		1.50082	0.558732					1.50082				0.558732					1.50082				0.558732
		1.57178	0.564009					1.57178				0.564009					1.57178				0.564009
		1.57446	0.567709					1.57446				0.567709					1.57446				0.567709
		1.7336	0.572546					1.7336				0.572546					1.7336				0.572546
		0.648883	0.579222					0.648883				0.579222					0.648883				0.579222
		0.718797	0.589261					0.718797				0.589261					0.718797				0.589261
		0.733869	0.595473					0.733869				0.595473					0.733869				0.595473
		0.775315	0.597301					0.775315				0.597301					0.775315				0.597301
		0.805932	0.601804					0.805932				0.601804					0.805932				0.601804
		0.807407	0.618749					0.807407				0.618749					0.807407				0.618749
		0.808817	0.621107					0.808817				0.621107					0.808817				0.621107
		0.809913	0.621388					0.809913				0.621388					0.809913				0.621388
		0.816896	0.621692					0.816896				0.621692					0.816896				0.621692
		0.818264	0.622052					0.818264				0.622052					0.818264				0.622052
		0.826994	0.622622					0.826994				0.622622					0.826994				0.622622
		0.830127	0.6253					0.830127				0.6253					0.830127				0.6253
		0.832765	0.62665					0.832765				0.62665					0.832765				0.62665
		0.851857	0.644513					0.851857				0.644513					0.851857				0.644513
		0.854937	0.649479					0.854937				0.649479					0.854937				0.649479
		0.872122	0.657305					0.872122				0.657305					0.872122				0.657305
		0.877131	0.663481					0.877131				0.663481					0.877131				0.663481
		0.877342	0.66378					0.877342				0.66378					0.877342				0.66378
		0.880429	0.66456					0.880429				0.66456					0.880429				0.66456
		0.884206	0.664932					0.884206				0.664932					0.884206				0.664932
		0.889887	0.667361					0.889887				0.667361					0.889887				0.667361
		0.898168	0.668668					0.898168				0.668668					0.898168				0.668668
		0.906538	0.669131					0.906538				0.669131					0.906538				0.669131
		0.920644	0.677493					0.920644				0.677493					0.920644				0.677493
		0.931105	0.684129					0.931105				0.684129					0.931105				0.684129
		0.948685	0.685083					0.948685				0.685083					0.948685				0.685083
		0.950762	0.688774					0.950762				0.688774					0.950762				0.688774
		0.950898	0.692016					0.950898				0.692016					0.950898				0.692016
		0.951558	0.693119					0.951558				0.693119					0.951558				0.693119
		0.954546	0.698954					0.954546				0.698954					0.954546				0.698954
		0.955714	0.699512					0.955714				0.699512					0.955714				0.699512
		0.957	0.703152					0.957				0.703152					0.957				0.703152
		0.97252	0.724014					0.97252				0.724014					0.97252				0.724014
		0.973413	0.725815					0.973413				0.725815					0.973413				0.725815
		0.982181	0.726084					0.982181				0.726084					0.982181				0.726084
		0.987209	0.730192					0.987209				0.730192					0.987209				0.730192
		0.994558	0.736121					0.994558				0.736121					0.994558				0.736121
		1	0.73904					1				0.73904					1				0.73904
		1	0.752299					1				0.752299					1				0.752299
		1.00243	0.759557					1.00243				0.759557					1.00243				0.759557
		1.00665	0.760628					1.00665				0.760628					1.00665				0.760628
		1.01931	0.765029					1.01931				0.765029					1.01931				0.765029
		1.02134	0.765839					1.02134				0.765839					1.02134				0.765839
		1.02275	0.789179					1.02275				0.789179					1.02275				0.789179
		1.02766	0.835826					1.02766				0.835826					1.02766				0.835826
		1.03513	0.836747					1.03513				0.836747					1.03513				0.836747
		1.04062	0.876719					1.04062				0.876719					1.04062				0.876719
		1.0421	0.886036					1.0421				0.886036					1.0421				0.886036
		1.04308	0.904704					1.04308				0.904704					1.04308				0.904704
		1.04569	0.949868					1.04569				0.949868					1.04569				0.949868
		1.052	1.04374					1.052				1.04374					1.052				1.04374
		1.05219	1.05883					1.05219				1.05883					1.05219				1.05883
		1.0596	0.415872					1.0596				0.415872					1.0596				0.415872
		1.07411	0.490061					1.07411				0.490061					1.07411				0.490061
		1.07444	0.510308					1.07444				0.510308					1.07444				0.510308
		1.0753	0.518039					1.0753				0.518039					1.0753				0.518039
		1.09142	0.520745					1.09142				0.520745					1.09142				0.520745
		1.09264	0.533734					1.09264				0.533734					1.09264				0.533734
		1.09316	0.534215					1.09316				0.534215					1.09316				0.534215
		1.10951	0.548243					1.10951				0.548243					1.10951				0.548243
		1.11132	0.559434					1.11132				0.559434					1.11132				0.559434
		1.11413	0.560779					1.11413				0.560779					1.11413				0.560779
		1.1146	0.564678					1.1146				0.564678					1.1146				0.564678
		1.12163	0.570403					1.12163				0.570403					1.12163				0.570403
		1.12234	0.585115					1.12234				0.585115					1.12234				0.585115
		1.12836	0.592391					1.12836				0.592391					1.12836				0.592391
		1.13343	0.596696					1.13343				0.596696					1.13343				0.596696
		1.14297	0.597961					1.14297				0.597961					1.14297				0.597961
		1.15585	0.600677					1.15585				0.600677					1.15585				0.600677
		1.15707	0.601864					1.15707				0.601864					1.15707				0.601864
		1.16978	0.607434					1.16978				0.607434					1.16978				0.607434
		1.1774	0.608906					1.1774				0.608906					1.1774				0.608906
		1.17912	0.612695					1.17912				0.612695					1.17912				0.612695
		1.19024	0.616134					1.19024				0.616134					1.19024				0.616134
		1.21059	0.620324					1.21059				0.620324					1.21059				0.620324
		1.21606	0.621724					1.21606				0.621724					1.21606				0.621724
		1.2381	0.626176					1.2381				0.626176					1.2381				0.626176
		1.24206	0.62662					1.24206				0.62662					1.24206				0.62662
		1.25501	0.627332					1.25501				0.627332					1.25501				0.627332
		1.26325	0.629964					1.26325				0.629964					1.26325				0.629964
		1.28307	0.640044					1.28307				0.640044					1.28307				0.640044
		1.28491	0.655484					1.28491				0.655484					1.28491				0.655484
		1.28548	0.658589					1.28548				0.658589					1.28548				0.658589
		1.31795	0.660398					1.31795				0.660398					1.31795				0.660398
		1.33219	0.661831					1.33219				0.661831					1.33219				0.661831
		1.37347	0.663401					1.37347				0.663401					1.37347				0.663401
		1.41822	0.673757					1.41822				0.673757					1.41822				0.673757
		1.43644	0.67393					1.43644				0.67393					1.43644				0.67393
		1.49026	0.676392					1.49026				0.676392					1.49026				0.676392
		1.49949	0.677268					1.49949				0.677268					1.49949				0.677268
		1.50812	0.682033					1.50812				0.682033					1.50812				0.682033
		1.63241	0.690686					1.63241				0.690686					1.63241				0.690686
		0.760525	0.695039					0.760525				0.695039					0.760525				0.695039
		0.854699	0.705091					0.854699				0.705091					0.854699				0.705091
		0.878361	0.707007					0.878361				0.707007					0.878361				0.707007
		0.906642	0.709718					0.906642				0.709718					0.906642				0.709718
		0.907459	0.734652					0.907459				0.734652					0.907459				0.734652
		0.929259	0.757412					0.929259				0.757412					0.929259				0.757412
		0.941749	0.778914					0.941749				0.778914					0.941749				0.778914
		0.967145	0.782491					0.967145				0.782491					0.967145				0.782491
		0.971567	0.782753					0.971567				0.782753					0.971567				0.782753
		0.98026	0.784786					0.98026				0.784786					0.98026				0.784786
		1.00712	0.795235					1.00712				0.795235					1.00712				0.795235
		1.0075	0.816156					1.0075				0.816156					1.0075				0.816156
		1.0091	0.818894					1.0091				0.818894					1.0091				0.818894
		1.03381	0.822934					1.03381				0.822934					1.03381				0.822934
		1.04588	0.827604					1.04588				0.827604					1.04588				0.827604
		1.05026	0.833061					1.05026				0.833061					1.05026				0.833061
		1.05083	0.833526					1.05083				0.833526					1.05083				0.833526
		1.06164	0.837873					1.06164				0.837873					1.06164				0.837873
		1.06282	0.847284					1.06282				0.847284					1.06282				0.847284
		1.07351	0.850718					1.07351				0.850718					1.07351				0.850718
		1.08903	0.851685					1.08903				0.851685					1.08903				0.851685
		1.09872	0.867887					1.09872				0.867887					1.09872				0.867887
		1.09984	0.868705					1.09984				0.868705					1.09984				0.868705
		1.10043	0.874878					1.10043				0.874878					1.10043				0.874878
		1.11728	0.879578					1.11728				0.879578					1.11728				0.879578
		1.12334	0.879712					1.12334				0.879712					1.12334				0.879712
		1.1333	0.881667					1.1333				0.881667					1.1333				0.881667
		1.1422	0.882057					1.1422				0.882057					1.1422				0.882057
		1.14761	0.882135					1.14761				0.882135					1.14761				0.882135
		1.16143	0.885647					1.16143				0.885647					1.16143				0.885647
		1.17289	0.892006					1.17289				0.892006					1.17289				0.892006
		1.18636	0.916212					1.18636				0.916212					1.18636				0.916212
		1.18764	0.922969					1.18764				0.922969					1.18764				0.922969
		1.18796	0.932592					1.18796				0.932592					1.18796				0.932592
		1.1953	0.935321					1.1953				0.935321					1.1953				0.935321
		1.20395	0.945235					1.20395				0.945235					1.20395				0.945235
		1.21479	0.959693					1.21479				0.959693					1.21479				0.959693
		1.22345	0.975547					1.22345				0.975547					1.22345				0.975547
		1.22628	0.997319					1.22628				0.997319					1.22628				0.997319
		1.23326	1.01809					1.23326				1.01809					1.23326				1.01809
		1.26502	1.04253					1.26502				1.04253					1.26502				1.04253
		1.27298	1.06988					1.27298				1.06988					1.27298				1.06988
		1.27631	0.195937					1.27631				0.195937					1.27631				0.195937
		1.28055	0.245043					1.28055				0.245043					1.28055				0.245043
		1.3002	0.252217					1.3002				0.252217					1.3002				0.252217
		1.32557	0.26426					1.32557				0.26426					1.32557				0.26426
		1.33047	0.266525					1.33047				0.266525					1.33047				0.266525
		1.40977	0.279798					1.40977				0.279798					1.40977				0.279798
		1.41993	0.313876					1.41993				0.313876					1.41993				0.313876
		1.42737	0.318989					1.42737				0.318989					1.42737				0.318989
		1.45638	0.331605					1.45638				0.331605					1.45638				0.331605
		1.4661	0.350578					1.4661				0.350578					1.4661				0.350578
		1.50082	0.35925					1.50082				0.35925					1.50082				0.35925
		1.57178	0.364363					1.57178				0.364363					1.57178				0.364363
		1.57446	0.376844					1.57446				0.376844					1.57446				0.376844
		1.7336	0.404467					1.7336				0.404467					1.7336				0.404467
		0.501966	0.408393					0.501966				0.408393					0.501966				0.408393
		0.568071	0.41115					0.568071				0.41115					0.568071				0.41115
		0.578768	0.414559					0.578768				0.414559					0.578768				0.414559
		0.582336	0.434921					0.582336				0.434921					0.582336				0.434921
		0.639794	0.435943					0.639794				0.435943					0.639794				0.435943
		0.690466	0.450326					0.690466				0.450326					0.690466				0.450326
		0.690658	0.451545					0.690658				0.451545					0.690658				0.451545
		0.748891	0.455464					0.748891				0.455464					0.748891				0.455464
		0.761095	0.45586					0.761095				0.45586					0.761095				0.45586
		0.762112	0.457537					0.762112				0.457537					0.762112				0.457537
		0.763156	0.471977					0.763156				0.471977					0.763156				0.471977
		0.764786	0.472071					0.764786				0.472071					0.764786				0.472071
		0.766139	0.472309					0.766139				0.472309					0.766139				0.472309
		0.768222	0.475996					0.768222				0.475996					0.768222				0.475996
		0.769571	0.476015					0.769571				0.476015					0.769571				0.476015
		0.786456	0.477618					0.786456				0.477618					0.786456				0.477618
		0.787742	0.484181					0.787742				0.484181					0.787742				0.484181
		0.787881	0.485249					0.787881				0.485249					0.787881				0.485249
		0.797252	0.490659					0.797252				0.490659					0.797252				0.490659
		0.801573	0.492224					0.801573				0.492224					0.801573				0.492224
		0.822084	0.49304					0.822084				0.49304					0.822084				0.49304
		0.822545	0.495614					0.822545				0.495614					0.822545				0.495614
		0.835396	0.496584					0.835396				0.496584					0.835396				0.496584
		0.84095	0.5					0.84095				0.5					0.84095				0.5
		0.841961	0.500877					0.841961				0.500877					0.841961				0.500877
		0.844861	0.50472					0.844861				0.50472					0.844861				0.50472
		0.844885	0.505171					0.844885				0.505171					0.844885				0.505171
		0.8473	0.506167					0.8473				0.506167					0.8473				0.506167
		0.850777	0.506498					0.850777				0.506498					0.850777				0.506498
		0.860139	0.509022					0.860139				0.509022					0.860139				0.509022
		0.861689	0.509824					0.861689				0.509824					0.861689				0.509824
		0.872401	0.511263					0.872401				0.511263					0.872401				0.511263
		0.873057	0.515381					0.873057				0.515381					0.873057				0.515381
		0.876552	0.515917					0.876552				0.515917					0.876552				0.515917
		0.877825	0.517182					0.877825				0.517182					0.877825				0.517182
		0.878061	0.518062					0.878061				0.518062					0.878061				0.518062
		0.884012	0.518826					0.884012				0.518826					0.884012				0.518826
		0.884199	0.520311					0.884199				0.520311					0.884199				0.520311
		0.885526	0.520393					0.885526				0.520393					0.885526				0.520393
		0.886117	0.521291					0.886117				0.521291					0.886117				0.521291
		0.8881	0.524122					0.8881				0.524122					0.8881				0.524122
		0.897952	0.524197					0.897952				0.524197					0.897952				0.524197
		0.899279	0.52896					0.899279				0.52896					0.899279				0.52896
		0.903103	0.529725					0.903103				0.529725					0.903103				0.529725
		0.906542	0.533897					0.906542				0.533897					0.906542				0.533897
		0.906984	0.535627					0.906984				0.535627					0.906984				0.535627
		0.907759	0.54107					0.907759				0.54107					0.907759				0.54107
		0.909725	0.542759					0.909725				0.542759					0.909725				0.542759
		0.910257	0.543336					0.910257				0.543336					0.910257				0.543336
		0.911173	0.545887					0.911173				0.545887					0.911173				0.545887
		0.912317	0.546429					0.912317				0.546429					0.912317				0.546429
		0.913866	0.547398					0.913866				0.547398					0.913866				0.547398
		0.914832	0.54782					0.914832				0.54782					0.914832				0.54782
		0.917555	0.547894					0.917555				0.547894					0.917555				0.547894
		0.917646	0.549527					0.917646				0.549527					0.917646				0.549527
		0.918392	0.55085					0.918392				0.55085					0.918392				0.55085
		0.919999	0.551207					0.919999				0.551207					0.919999				0.551207
		0.923618	0.55194					0.923618				0.55194					0.923618				0.55194
		0.924327	0.557961					0.924327				0.557961					0.924327				0.557961
		0.924366	0.558356					0.924366				0.558356					0.924366				0.558356
		0.924652	0.559027					0.924652				0.559027					0.924652				0.559027
		0.924884	0.559561					0.924884				0.559561					0.924884				0.559561
		0.9258	0.561284					0.9258				0.561284					0.9258				0.561284
		0.928689	0.56479					0.928689				0.56479					0.928689				0.56479
		0.928925	0.566501					0.928925				0.566501					0.928925				0.566501
		0.929945	0.567006					0.929945				0.567006					0.929945				0.567006
		0.933207	0.567333					0.933207				0.567333					0.933207				0.567333
		0.933799	0.567617					0.933799				0.567617					0.933799				0.567617
		0.934239	0.569328					0.934239				0.569328					0.934239				0.569328
		0.934732	0.57872					0.934732				0.57872					0.934732				0.57872
		0.941588	0.581841					0.941588				0.581841					0.941588				0.581841
		0.944283	0.583532					0.944283				0.583532					0.944283				0.583532
		0.944389	0.583925					0.944389				0.583925					0.944389				0.583925
		0.944423	0.584497					0.944423				0.584497					0.944423				0.584497
		0.94815	0.585395					0.94815				0.585395					0.94815				0.585395
		0.949522	0.58642					0.949522				0.58642					0.949522				0.58642
		0.950956	0.588525					0.950956				0.588525					0.950956				0.588525
		0.951477	0.588875					0.951477				0.588875					0.951477				0.588875
		0.953326	0.589492					0.953326				0.589492					0.953326				0.589492
		0.953412	0.589812					0.953412				0.589812					0.953412				0.589812
		0.954343	0.594929					0.954343				0.594929					0.954343				0.594929
		0.955517	0.595227					0.955517				0.595227					0.955517				0.595227
		0.956673	0.59644					0.956673				0.59644					0.956673				0.59644
		0.957544	0.598301					0.957544				0.598301					0.957544				0.598301
		0.957547	0.598804					0.957547				0.598804					0.957547				0.598804
		0.958815	0.599724					0.958815				0.599724					0.958815				0.599724
		0.959316	0.602979					0.959316				0.602979					0.959316				0.602979
		0.960415	0.604046					0.960415				0.604046					0.960415				0.604046
		0.960854	0.607572					0.960854				0.607572					0.960854				0.607572
		0.961991	0.608615					0.961991				0.608615					0.961991				0.608615
		0.962154	0.609638					0.962154				0.609638					0.962154				0.609638
		0.96291	0.611831					0.96291				0.611831					0.96291				0.611831
		0.963429	0.612745					0.963429				0.612745					0.963429				0.612745
		0.964738	0.614305					0.964738				0.614305					0.964738				0.614305
		0.969271	0.614476					0.969271				0.614476					0.969271				0.614476
		0.970838	0.614973					0.970838				0.614973					0.970838				0.614973
		0.973451	0.615389					0.973451				0.615389					0.973451				0.615389
		0.973881	0.615918					0.973881				0.615918					0.973881				0.615918
		0.974273	0.617104					0.974273				0.617104					0.974273				0.617104
		0.974704	0.6202					0.974704				0.6202					0.974704				0.6202
		0.975733	0.620563					0.975733				0.620563					0.975733				0.620563
		0.97599	0.621654					0.97599				0.621654					0.97599				0.621654
		0.977145	0.624121					0.977145				0.624121					0.977145				0.624121
		0.977265	0.624149					0.977265				0.624149					0.977265				0.624149
		0.979997	0.62574					0.979997				0.62574					0.979997				0.62574
		0.980029	0.627076					0.980029				0.627076					0.980029				0.627076
		0.980334	0.627907					0.980334				0.627907					0.980334				0.627907
		0.980334	0.628527					0.980334				0.628527					0.980334				0.628527
		0.980723	0.629788					0.980723				0.629788					0.980723				0.629788
		0.980995	0.631971					0.980995				0.631971					0.980995				0.631971
		0.98126	0.631977					0.98126				0.631977					0.98126				0.631977
		0.981971	0.632741					0.981971				0.632741					0.981971				0.632741
		0.983483	0.638987					0.983483				0.638987					0.983483				0.638987
		0.98425	0.639153					0.98425				0.639153					0.98425				0.639153
		0.985801	0.639887					0.985801				0.639887					0.985801				0.639887
		0.986537	0.640533					0.986537				0.640533					0.986537				0.640533
		0.986609	0.6407					0.986609				0.6407					0.986609				0.6407
		0.986708	0.64075					0.986708				0.64075					0.986708				0.64075
		0.987008	0.641074					0.987008				0.641074					0.987008				0.641074
		0.988457	0.641628					0.988457				0.641628					0.988457				0.641628
		0.988602	0.64195					0.988602				0.64195					0.988602				0.64195
		0.989124	0.642863					0.989124				0.642863					0.989124				0.642863
		0.989982	0.642947					0.989982				0.642947					0.989982				0.642947
		0.990381	0.645072					0.990381				0.645072					0.990381				0.645072
		0.990446	0.646546					0.990446				0.646546					0.990446				0.646546
		0.991808	0.647419					0.991808				0.647419					0.991808				0.647419
		0.991885	0.647756					0.991885				0.647756					0.991885				0.647756
		0.991897	0.647828					0.991897				0.647828					0.991897				0.647828
		0.992005	0.64839					0.992005				0.64839					0.992005				0.64839
		0.992186	0.649371					0.992186				0.649371					0.992186				0.649371
		0.992266	0.649457					0.992266				0.649457					0.992266				0.649457
		0.992574	0.650408					0.992574				0.650408					0.992574				0.650408
		0.992651	0.651596					0.992651				0.651596					0.992651				0.651596
		0.995203	0.651902					0.995203				0.651902					0.995203				0.651902
		0.99582	0.652894					0.99582				0.652894					0.99582				0.652894
		0.996472	0.653392					0.996472				0.653392					0.996472				0.653392
		0.99653	0.653605					0.99653				0.653605					0.99653				0.653605
		0.996601	0.653899					0.996601				0.653899					0.996601				0.653899
		0.996719	0.655878					0.996719				0.655878					0.996719				0.655878
		0.996727	0.658929					0.996727				0.658929					0.996727				0.658929
		0.997396	0.660592					0.997396				0.660592					0.997396				0.660592
		0.997663	0.660672					0.997663				0.660672					0.997663				0.660672
		0.997875	0.66091					0.997875				0.66091					0.997875				0.66091
		0.998193	0.662317					0.998193				0.662317					0.998193				0.662317
		0.998349	0.662446					0.998349				0.662446					0.998349				0.662446
		0.998505	0.662517					0.998505				0.662517					0.998505				0.662517
		0.998549	0.662686					0.998549				0.662686					0.998549				0.662686
		1	0.664149					1				0.664149					1				0.664149
		1	0.664429					1				0.664429					1				0.664429
		1.00084	0.66549					1.00084				0.66549					1.00084				0.66549
		1.00091	0.666124					1.00091				0.666124					1.00091				0.666124
		1.00094	0.667569					1.00094				0.667569					1.00094				0.667569
		1.00165	0.668496					1.00165				0.668496					1.00165				0.668496
		1.00209	0.669347					1.00209				0.669347					1.00209				0.669347
		1.00212	0.66957					1.00212				0.66957					1.00212				0.66957
		1.00242	0.669805					1.00242				0.669805					1.00242				0.669805
		1.0026	0.670592					1.0026				0.670592					1.0026				0.670592
		1.00284	0.6713					1.00284				0.6713					1.00284				0.6713
		1.00303	0.672303					1.00303				0.672303					1.00303				0.672303
		1.00316	0.673779					1.00316				0.673779					1.00316				0.673779
		1.00337	0.673843					1.00337				0.673843					1.00337				0.673843
		1.00396	0.674595					1.00396				0.674595					1.00396				0.674595
		1.00414	0.677077					1.00414				0.677077					1.00414				0.677077
		1.00421	0.677303					1.00421				0.677303					1.00421				0.677303
		1.00428	0.677543					1.00428				0.677543					1.00428				0.677543
		1.0044	0.678818					1.0044				0.678818					1.0044				0.678818
		1.00475	0.67963					1.00475				0.67963					1.00475				0.67963
		1.00527	0.68175					1.00527				0.68175					1.00527				0.68175
		1.00578	0.682522					1.00578				0.682522					1.00578				0.682522
		1.00578	0.688351					1.00578				0.688351					1.00578				0.688351
		1.0062	0.690652					1.0062				0.690652					1.0062				0.690652
		1.00715	0.693475					1.00715				0.693475					1.00715				0.693475
		1.00745	0.693655					1.00745				0.693655					1.00745				0.693655
		1.00827	0.69428					1.00827				0.69428					1.00827				0.69428
		1.00837	0.69428					1.00837				0.69428					1.00837				0.69428
		1.00839	0.69466					1.00839				0.69466					1.00839				0.69466
		1.00927	0.696656					1.00927				0.696656					1.00927				0.696656
		1.00978	0.697046					1.00978				0.697046					1.00978				0.697046
		1.00984	0.697235					1.00984				0.697235					1.00984				0.697235
		1.0108	0.698074					1.0108				0.698074					1.0108				0.698074
		1.01109	0.69972					1.01109				0.69972					1.01109				0.69972
		1.01153	0.699764					1.01153				0.699764					1.01153				0.699764
		1.01235	0.700021					1.01235				0.700021					1.01235				0.700021
		1.01296	0.700162					1.01296				0.700162					1.01296				0.700162
		1.01305	0.700299					1.01305				0.700299					1.01305				0.700299
		1.01392	0.70129					1.01392				0.70129					1.01392				0.70129
		1.01411	0.701762					1.01411				0.701762					1.01411				0.701762
		1.01442	0.702317					1.01442				0.702317					1.01442				0.702317
		1.01512	0.703065					1.01512				0.703065					1.01512				0.703065
		1.0157	0.703078					1.0157				0.703078					1.0157				0.703078
		1.01639	0.705278					1.01639				0.705278					1.01639				0.705278
		1.01641	0.705809					1.01641				0.705809					1.01641				0.705809
		1.01646	0.706324					1.01646				0.706324					1.01646				0.706324
		1.01704	0.707075					1.01704				0.707075					1.01704				0.707075
		1.01758	0.70864					1.01758				0.70864					1.01758				0.70864
		1.01792	0.709485					1.01792				0.709485					1.01792				0.709485
		1.01851	0.710661					1.01851				0.710661					1.01851				0.710661
		1.0188	0.710957					1.0188				0.710957					1.0188				0.710957
		1.01881	0.717894					1.01881				0.717894					1.01881				0.717894
		1.01884	0.720858					1.01884				0.720858					1.01884				0.720858
		1.01899	0.721542					1.01899				0.721542					1.01899				0.721542
		1.02	0.72234					1.02				0.72234					1.02				0.72234
		1.02077	0.722538					1.02077				0.722538					1.02077				0.722538
		1.02091	0.722552					1.02091				0.722552					1.02091				0.722552
		1.02109	0.723521					1.02109				0.723521					1.02109				0.723521
		1.02111	0.724006					1.02111				0.724006					1.02111				0.724006
		1.02146	0.724131					1.02146				0.724131					1.02146				0.724131
		1.02155	0.72472					1.02155				0.72472					1.02155				0.72472
		1.02264	0.726352					1.02264				0.726352					1.02264				0.726352
		1.02328	0.72698					1.02328				0.72698					1.02328				0.72698
		1.0241	0.727187					1.0241				0.727187					1.0241				0.727187
		1.02576	0.727661					1.02576				0.727661					1.02576				0.727661
		1.02587	0.727796					1.02587				0.727796					1.02587				0.727796
		1.02611	0.728666					1.02611				0.728666					1.02611				0.728666
		1.02886	0.729867					1.02886				0.729867					1.02886				0.729867
		1.02921	0.729982					1.02921				0.729982					1.02921				0.729982
		1.03064	0.731003					1.03064				0.731003					1.03064				0.731003
		1.03073	0.732519					1.03073				0.732519					1.03073				0.732519
		1.03127	0.732531					1.03127				0.732531					1.03127				0.732531
		1.03178	0.733171					1.03178				0.733171					1.03178				0.733171
		1.0321	0.734152					1.0321				0.734152					1.0321				0.734152
		1.0325	0.734892					1.0325				0.734892					1.0325				0.734892
		1.03473	0.735844					1.03473				0.735844					1.03473				0.735844
		1.03587	0.736193					1.03587				0.736193					1.03587				0.736193
		1.03604	0.736581					1.03604				0.736581					1.03604				0.736581
		1.03664	0.737029					1.03664				0.737029					1.03664				0.737029
		1.03829	0.737601					1.03829				0.737601					1.03829				0.737601
		1.03936	0.739073					1.03936				0.739073					1.03936				0.739073
		1.04064	0.739813					1.04064				0.739813					1.04064				0.739813
		1.04154	0.741803					1.04154				0.741803					1.04154				0.741803
		1.04192	0.742135					1.04192				0.742135					1.04192				0.742135
		1.04253	0.744015					1.04253				0.744015					1.04253				0.744015
		1.04253	0.745538					1.04253				0.745538					1.04253				0.745538
		1.04349	0.746634					1.04349				0.746634					1.04349				0.746634
		1.04353	0.750826					1.04353				0.750826					1.04353				0.750826
		1.04369	0.750862					1.04369				0.750862					1.04369				0.750862
		1.04645	0.751023					1.04645				0.751023					1.04645				0.751023
		1.04708	0.752101					1.04708				0.752101					1.04708				0.752101
		1.0475	0.753705					1.0475				0.753705					1.0475				0.753705
		1.04769	0.75559					1.04769				0.75559					1.04769				0.75559
		1.04789	0.756951					1.04789				0.756951					1.04789				0.756951
		1.04849	0.757405					1.04849				0.757405					1.04849				0.757405
		1.04917	0.758044					1.04917				0.758044					1.04917				0.758044
		1.04924	0.758923					1.04924				0.758923					1.04924				0.758923
		1.04964	0.760003					1.04964				0.760003					1.04964				0.760003
		1.05345	0.761118					1.05345				0.761118					1.05345				0.761118
		1.05377	0.762738					1.05377				0.762738					1.05377				0.762738
		1.05397	0.762767					1.05397				0.762767					1.05397				0.762767
		1.05407	0.762898					1.05407				0.762898					1.05407				0.762898
		1.0554	0.764095					1.0554				0.764095					1.0554				0.764095
		1.05594	0.764189					1.05594				0.764189					1.05594				0.764189
		1.05689	0.764378					1.05689				0.764378					1.05689				0.764378
		1.05759	0.764813					1.05759				0.764813					1.05759				0.764813
		1.05908	0.765286					1.05908				0.765286					1.05908				0.765286
		1.05986	0.765532					1.05986				0.765532					1.05986				0.765532
		1.06087	0.765742					1.06087				0.765742					1.06087				0.765742
		1.06201	0.766727					1.06201				0.766727					1.06201				0.766727
		1.06397	0.767355					1.06397				0.767355					1.06397				0.767355
		1.06487	0.772948					1.06487				0.772948					1.06487				0.772948
		1.06611	0.773636					1.06611				0.773636					1.06611				0.773636
		1.06643	0.77438					1.06643				0.77438					1.06643				0.77438
		1.06681	0.777175					1.06681				0.777175					1.06681				0.777175
		1.06912	0.77736					1.06912				0.77736					1.06912				0.77736
		1.0692	0.777972					1.0692				0.777972					1.0692				0.777972
		1.06981	0.778777					1.06981				0.778777					1.06981				0.778777
		1.07017	0.779617					1.07017				0.779617					1.07017				0.779617
		1.0714	0.780409					1.0714				0.780409					1.0714				0.780409
		1.07305	0.781529					1.07305				0.781529					1.07305				0.781529
		1.0746	0.781875					1.0746				0.781875					1.0746				0.781875
		1.07462	0.782807					1.07462				0.782807					1.07462				0.782807
		1.07475	0.783111					1.07475				0.783111					1.07475				0.783111
		1.07534	0.784714					1.07534				0.784714					1.07534				0.784714
		1.0757	0.785496					1.0757				0.785496					1.0757				0.785496
		1.07684	0.790673					1.07684				0.790673					1.07684				0.790673
		1.07747	0.790962					1.07747				0.790962					1.07747				0.790962
		1.07758	0.791652					1.07758				0.791652					1.07758				0.791652
		1.07764	0.791746					1.07764				0.791746					1.07764				0.791746
		1.07857	0.793404					1.07857				0.793404					1.07857				0.793404
		1.07944	0.793612					1.07944				0.793612					1.07944				0.793612
		1.08174	0.793752					1.08174				0.793752					1.08174				0.793752
		1.08334	0.794472					1.08334				0.794472					1.08334				0.794472
		1.08351	0.794604					1.08351				0.794604					1.08351				0.794604
		1.08466	0.79962					1.08466				0.79962					1.08466				0.79962
		1.08475	0.800694					1.08475				0.800694					1.08475				0.800694
		1.0857	0.800765					1.0857				0.800765					1.0857				0.800765
		1.08652	0.804492					1.08652				0.804492					1.08652				0.804492
		1.08736	0.80622					1.08736				0.80622					1.08736				0.80622
		1.08781	0.809524					1.08781				0.809524					1.08781				0.809524
		1.08815	0.811954					1.08815				0.811954					1.08815				0.811954
		1.08958	0.812231					1.08958				0.812231					1.08958				0.812231
		1.08965	0.813622					1.08965				0.813622					1.08965				0.813622
		1.09015	0.81536					1.09015				0.81536					1.09015				0.81536
		1.09066	0.815447					1.09066				0.815447					1.09066				0.815447
		1.09092	0.816594					1.09092				0.816594					1.09092				0.816594
		1.09092	0.817377					1.09092				0.817377					1.09092				0.817377
		1.09161	0.818177					1.09161				0.818177					1.09161				0.818177
		1.09175	0.81924					1.09175				0.81924					1.09175				0.81924
		1.09376	0.822898					1.09376				0.822898					1.09376				0.822898
		1.09426	0.82292					1.09426				0.82292					1.09426				0.82292
		1.09504	0.824711					1.09504				0.824711					1.09504				0.824711
		1.09775	0.824789					1.09775				0.824789					1.09775				0.824789
		1.09916	0.825389					1.09916				0.825389					1.09916				0.825389
		1.09917	0.826294					1.09917				0.826294					1.09917				0.826294
		1.09931	0.826697					1.09931				0.826697					1.09931				0.826697
		1.10053	0.828848					1.10053				0.828848					1.10053				0.828848
		1.10193	0.830193					1.10193				0.830193					1.10193				0.830193
		1.10236	0.830328					1.10236				0.830328					1.10236				0.830328
		1.10303	0.831171					1.10303				0.831171					1.10303				0.831171
		1.10374	0.831759					1.10374				0.831759					1.10374				0.831759
		1.10436	0.832559					1.10436				0.832559					1.10436				0.832559
		1.10473	0.835868					1.10473				0.835868					1.10473				0.835868
		1.10475	0.836037					1.10475				0.836037					1.10475				0.836037
		1.10569	0.840004					1.10569				0.840004					1.10569				0.840004
		1.10772	0.842627					1.10772				0.842627					1.10772				0.842627
		1.10884	0.844538					1.10884				0.844538					1.10884				0.844538
		1.11077	0.845959					1.11077				0.845959					1.11077				0.845959
		1.11147	0.846369					1.11147				0.846369					1.11147				0.846369
		1.11184	0.849896					1.11184				0.849896					1.11184				0.849896
		1.11746	0.849989					1.11746				0.849989					1.11746				0.849989
		1.11791	0.851011					1.11791				0.851011					1.11791				0.851011
		1.1188	0.851548					1.1188				0.851548					1.1188				0.851548
		1.11891	0.852512					1.11891				0.852512					1.11891				0.852512
		1.12034	0.854074					1.12034				0.854074					1.12034				0.854074
		1.12074	0.854263					1.12074				0.854263					1.12074				0.854263
		1.12147	0.85504					1.12147				0.85504					1.12147				0.85504
		1.12401	0.855935					1.12401				0.855935					1.12401				0.855935
		1.12565	0.860968					1.12565				0.860968					1.12565				0.860968
		1.12578	0.861619					1.12578				0.861619					1.12578				0.861619
		1.12743	0.861789					1.12743				0.861789					1.12743				0.861789
		1.12773	0.862202					1.12773				0.862202					1.12773				0.862202
		1.12776	0.862869					1.12776				0.862869					1.12776				0.862869
		1.12801	0.863348					1.12801				0.863348					1.12801				0.863348
		1.12803	0.864394					1.12803				0.864394					1.12803				0.864394
		1.12824	0.867317					1.12824				0.867317					1.12824				0.867317
		1.1287	0.873131					1.1287				0.873131					1.1287				0.873131
		1.12888	0.875769					1.12888				0.875769					1.12888				0.875769
		1.12993	0.880626					1.12993				0.880626					1.12993				0.880626
		1.13063	0.880688					1.13063				0.880688					1.13063				0.880688
		1.13314	0.882697					1.13314				0.882697					1.13314				0.882697
		1.13378	0.884198					1.13378				0.884198					1.13378				0.884198
		1.13519	0.884676					1.13519				0.884676					1.13519				0.884676
		1.13704	0.888317					1.13704				0.888317					1.13704				0.888317
		1.13915	0.892239					1.13915				0.892239					1.13915				0.892239
		1.14133	0.895475					1.14133				0.895475					1.14133				0.895475
		1.14169	0.897877					1.14169				0.897877					1.14169				0.897877
		1.14274	0.902116					1.14274				0.902116					1.14274				0.902116
		1.14283	0.903087					1.14283				0.903087					1.14283				0.903087
		1.14471	0.903729					1.14471				0.903729					1.14471				0.903729
		1.14497	0.904084					1.14497				0.904084					1.14497				0.904084
		1.14714	0.905339					1.14714				0.905339					1.14714				0.905339
		1.14904	0.906531					1.14904				0.906531					1.14904				0.906531
		1.15092	0.907675					1.15092				0.907675					1.15092				0.907675
		1.151	0.910172					1.151				0.910172					1.151				0.910172
		1.15178	0.910539					1.15178				0.910539					1.15178				0.910539
		1.15231	0.911571					1.15231				0.911571					1.15231				0.911571
		1.15361	0.911819					1.15361				0.911819					1.15361				0.911819
		1.15409	0.915721					1.15409				0.915721					1.15409				0.915721
		1.1547	0.915741					1.1547				0.915741					1.1547				0.915741
		1.15657	0.921039					1.15657				0.921039					1.15657				0.921039
		1.15973	0.923201					1.15973				0.923201					1.15973				0.923201
		1.16688	0.927712					1.16688				0.927712					1.16688				0.927712
		1.16881	0.92844					1.16881				0.92844					1.16881				0.92844
		1.17045	0.929797					1.17045				0.929797					1.17045				0.929797
		1.17481	0.93031					1.17481				0.93031					1.17481				0.93031
		1.17579	0.934995					1.17579				0.934995					1.17579				0.934995
		1.17738	0.935042					1.17738				0.935042					1.17738				0.935042
		1.17926	0.947469					1.17926				0.947469					1.17926				0.947469
		1.18112	0.949465					1.18112				0.949465					1.18112				0.949465
		1.18295	0.955087					1.18295				0.955087					1.18295				0.955087
		1.18305	0.955276					1.18305				0.955276					1.18305				0.955276
		1.18414	0.956718					1.18414				0.956718					1.18414				0.956718
		1.18494	0.96424					1.18494				0.96424					1.18494				0.96424
		1.18518	0.968667					1.18518				0.968667					1.18518				0.968667
		1.1869	0.970842					1.1869				0.970842					1.1869				0.970842
		1.19241	0.97333					1.19241				0.97333					1.19241				0.97333
		1.19325	0.973415					1.19325				0.973415					1.19325				0.973415
		1.19652	0.974325					1.19652				0.974325					1.19652				0.974325
		1.19728	0.977631					1.19728				0.977631					1.19728				0.977631
		1.20738	0.983407					1.20738				0.983407					1.20738				0.983407
		1.20911	0.988873					1.20911				0.988873					1.20911				0.988873
		1.21	0.994771					1.21				0.994771					1.21				0.994771
		1.21291	1.00113					1.21291				1.00113					1.21291				1.00113
		1.21591	1.00512					1.21591				1.00512					1.21591				1.00512
		1.21921	1.01727					1.21921				1.01727					1.21921				1.01727
		1.22192	1.04396					1.22192				1.04396					1.22192				1.04396
		1.22487	1.04496					1.22487				1.04496					1.22487				1.04496
		1.2259	1.09144					1.2259				1.09144					1.2259				1.09144
		1.226	1.09606					1.226				1.09606					1.226				1.09606
		1.22805	1.09793					1.22805				1.09793					1.22805				1.09793
		1.22943	1.23046					1.22943				1.23046					1.22943				1.23046
		1.23058	1.23438					1.23058				1.23438					1.23058				1.23438
		1.23124						1.23124									1.23124
		1.23323						1.23323									1.23323
		1.23401						1.23401									1.23401
		1.23869						1.23869									1.23869
		1.2387						1.2387									1.2387
		1.23969						1.23969									1.23969
		1.24307						1.24307									1.24307
		1.24355						1.24355									1.24355
		1.24723						1.24723									1.24723
		1.25867						1.25867									1.25867
		1.25908						1.25908									1.25908
		1.25919						1.25919									1.25919
		1.26493						1.26493									1.26493
		1.26851						1.26851									1.26851
		1.26971						1.26971									1.26971
		1.27023						1.27023									1.27023
		1.2703						1.2703									1.2703
		1.27546						1.27546									1.27546
		1.27679						1.27679									1.27679
		1.27985						1.27985									1.27985
		1.28348						1.28348									1.28348
		1.28447						1.28447									1.28447
		1.28484						1.28484									1.28484
		1.28824						1.28824									1.28824
		1.29147						1.29147									1.29147
		1.29159						1.29159									1.29159
		1.30522						1.30522									1.30522
		1.3103						1.3103									1.3103
		1.31208						1.31208									1.31208
		1.31218						1.31218									1.31218
		1.3235						1.3235									1.3235
		1.32701						1.32701									1.32701
		1.33016						1.33016									1.33016
		1.33362						1.33362									1.33362
		1.33631						1.33631									1.33631
		1.33689						1.33689									1.33689
		1.35241						1.35241									1.35241
		1.35433						1.35433									1.35433
		1.36162						1.36162									1.36162
		1.36308						1.36308									1.36308
		1.36509						1.36509									1.36509
		1.36816						1.36816									1.36816
		1.37794						1.37794									1.37794
		1.37845						1.37845									1.37845
		1.39113						1.39113									1.39113
		1.39294						1.39294									1.39294
		1.39408						1.39408									1.39408
		1.39763						1.39763									1.39763
		1.40239						1.40239									1.40239
		1.40256						1.40256									1.40256
		1.40334						1.40334									1.40334
		1.40668						1.40668									1.40668
		1.40904						1.40904									1.40904
		1.41025						1.41025									1.41025
		1.41042						1.41042									1.41042
		1.41439						1.41439									1.41439
		1.43022						1.43022									1.43022
		1.43112						1.43112									1.43112
		1.44125						1.44125									1.44125
		1.44357						1.44357									1.44357
		1.45075						1.45075									1.45075
		1.45209						1.45209									1.45209
		1.45288						1.45288									1.45288
		1.4648						1.4648									1.4648
		1.46757						1.46757									1.46757
		1.476						1.476									1.476
		1.48355						1.48355									1.48355
		1.48989						1.48989									1.48989
		1.49342						1.49342									1.49342
		1.49613						1.49613									1.49613
		1.49617						1.49617									1.49617
		1.4994						1.4994									1.4994
		1.55809						1.55809									1.55809
		1.58471						1.58471									1.58471
		1.58631						1.58631									1.58631
		1.58977						1.58977									1.58977
		1.59497						1.59497									1.59497
		1.61158						1.61158									1.61158
		1.63065						1.63065									1.63065
		1.63489						1.63489									1.63489
		1.63898						1.63898									1.63898
		1.64989						1.64989									1.64989
		1.71303						1.71303									1.71303
		1.73762						1.73762									1.73762
		1.79148						1.79148									1.79148
		1.79234						1.79234									1.79234
		1.80987						1.80987									1.80987
		1.8401						1.8401									1.8401
		1.84564						1.84564									1.84564
		1.84954						1.84954									1.84954
		1.85168						1.85168									1.85168
		1.8783						1.8783									1.8783
		1.93723						1.93723									1.93723
		1.94589						1.94589									1.94589
		1.95316						1.95316									1.95316
		2.09105						2.09105									2.09105
		2.37342						2.37342									2.37342
		2.54606						2.54606									2.54606
