# Supplementary material for: Multiple antagonist calcium-dependent mechanisms control CaM kinase-1 subcellular localization in a C. elegans thermal nociceptor
Source: eLife. 2023 May 11;12:e85260. doi: 10.7554/eLife.85260 (PMC10174685; doi:10.7554/eLife.85260)
Supplement: Figure 3—source data 1. [file elife-85260-fig3-data1.xlsx]

## Sheet: Figure 3  source data
Figure 3 source data
Figure 3B					Figure 3C					Figure 3D					Figure 3E					Figure 3F
20°C	20°C	20°C	20°C		28°C	28°C	28°C	28°C		20°C	20°C	20°C	20°C		28°C	20°C	28°C	20°C		28°C	28°C	28°C	28°C	28°C	28°C
T179D; W305S	W305S	T179D	CMK-1(wt)		T179A; NES288-294	NES288-294	T179A	CMK-1(wt)		T179D; NLS71-78	NLS71-78	T179D	CMK-1(wt)		T179D	T179D	CMK-1(wt)	CMK-1(wt)		T179D/S325A	S325A	T179D/ NES288-294	NES288-294	T179D	CMK-1(wt)
0.0944269	0.363107	0.146272	0.294018		0.254068	0.514116	0.189403	0.590775		0.311703	0.303926	0.146272	0.294018		0.531372	0.146272	0.590775	0.294018		0.59906	0.403061	0.509345	0.514116	0.531372	0.590775
0.333333	0.379444	0.361556	0.350641		0.365982	0.604264	0.398599	0.623502		0.439885	0.352522	0.361556	0.350641		0.544972	0.361556	0.623502	0.350641		0.641693	0.443766	0.573296	0.604264	0.544972	0.623502
0.447457	0.390051	0.46146	0.408772		0.451439	0.626846	0.40275	0.6449		0.453739	0.381053	0.46146	0.408772		0.579294	0.46146	0.6449	0.408772		0.666667	0.540998	0.574339	0.626846	0.579294	0.6449
0.450501	0.406815	0.469837	0.409096		0.462821	0.70172	0.473383	0.645435		0.456632	0.416381	0.469837	0.409096		0.581269	0.469837	0.645435	0.409096		0.731778	0.613782	0.583326	0.70172	0.581269	0.645435
0.462228	0.407038	0.471628	0.448045		0.489238	0.724287	0.482814	0.658204		0.462763	0.419468	0.471628	0.448045		0.586404	0.471628	0.658204	0.448045		0.80211	0.659727	0.689815	0.724287	0.586404	0.658204
0.465689	0.415075	0.48101	0.467095		0.49365	0.725356	0.507269	0.658658		0.506798	0.431092	0.48101	0.467095		0.600264	0.48101	0.658658	0.467095		0.806664	0.674361	0.696524	0.725356	0.600264	0.658658
0.47629	0.422963	0.495386	0.468072		0.515233	0.761247	0.508164	0.6655		0.527947	0.451824	0.495386	0.468072		0.602674	0.495386	0.6655	0.468072		0.811382	0.696921	0.723015	0.761247	0.602674	0.6655
0.478702	0.43935	0.505937	0.468808		0.525691	0.77276	0.523499	0.669988		0.54757	0.454853	0.505937	0.468808		0.627086	0.505937	0.669988	0.468808		0.815562	0.711482	0.724254	0.77276	0.627086	0.669988
0.501738	0.446114	0.536515	0.504257		0.52901	0.784182	0.537699	0.680463		0.548974	0.459288	0.536515	0.504257		0.643521	0.536515	0.680463	0.504257		0.83196	0.724968	0.727466	0.784182	0.643521	0.680463
0.514981	0.451694	0.541337	0.51748		0.54756	0.788498	0.549435	0.687726		0.564544	0.459802	0.541337	0.51748		0.70779	0.541337	0.687726	0.51748		0.86425	0.732506	0.750233	0.788498	0.70779	0.687726
0.55756	0.456271	0.552124	0.518342		0.548063	0.796607	0.550481	0.726894		0.57944	0.464244	0.552124	0.518342		0.717475	0.552124	0.726894	0.518342		0.901527	0.738959	0.751645	0.796607	0.717475	0.726894
0.615914	0.457563	0.569034	0.520003		0.552448	0.80623	0.554869	0.730697		0.57967	0.467493	0.569034	0.520003		0.721913	0.569034	0.730697	0.520003		0.908987	0.739848	0.754246	0.80623	0.721913	0.730697
0.620552	0.458109	0.5708	0.525046		0.565481	0.809378	0.5586	0.740046		0.580894	0.47087	0.5708	0.525046		0.726922	0.5708	0.740046	0.525046		0.911395	0.742508	0.756804	0.809378	0.726922	0.740046
0.640676	0.480482	0.571167	0.533197		0.573175	0.835008	0.562778	0.751302		0.58186	0.478489	0.571167	0.533197		0.731379	0.571167	0.751302	0.533197		1.05347	0.768042	0.757476	0.835008	0.731379	0.751302
0.644705	0.48675	0.574146	0.542768		0.578718	0.851516	0.562812	0.756872		0.582916	0.48124	0.574146	0.542768		0.748708	0.574146	0.756872	0.542768		1.05845	0.768213	0.758434	0.851516	0.748708	0.756872
0.653321	0.490712	0.577313	0.543117		0.581826	0.85362	0.583113	0.766572		0.588719	0.481863	0.577313	0.543117		0.749279	0.577313	0.766572	0.543117		1.12149	0.777778	0.765702	0.85362	0.749279	0.766572
0.668296	0.494347	0.579339	0.552342		0.587205	0.88807	0.600194	0.783417		0.589455	0.500733	0.579339	0.552342		0.760639	0.579339	0.783417	0.552342		1.17617	0.805154	0.765897	0.88807	0.760639	0.783417
0.684407	0.503528	0.591189	0.555416		0.590086	0.897032	0.601196	0.787051		0.604778	0.508895	0.591189	0.555416		0.768643	0.591189	0.787051	0.555416		0.53064	0.811813	0.773395	0.897032	0.768643	0.787051
0.693969	0.506217	0.593237	0.566755		0.598616	0.920898	0.604372	0.788489		0.61189	0.509363	0.593237	0.566755		0.774333	0.593237	0.788489	0.566755		0.605874	0.833509	0.775867	0.920898	0.774333	0.788489
0.699097	0.511697	0.596699	0.584831		0.614462	0.957765	0.610286	0.790604		0.613986	0.519707	0.596699	0.584831		0.775589	0.596699	0.790604	0.584831		0.637707	0.845296	0.776304	0.957765	0.775589	0.790604
0.717278	0.517024	0.598673	0.589971		0.61722	0.959268	0.623193	0.799819		0.621491	0.52917	0.598673	0.589971		0.7782	0.598673	0.799819	0.589971		0.682406	0.864708	0.782063	0.959268	0.7782	0.799819
0.723579	0.518307	0.599992	0.590087		0.62066	0.974661	0.623815	0.802384		0.626775	0.53638	0.599992	0.590087		0.808217	0.599992	0.802384	0.590087		0.68891	0.877417	0.786434	0.974661	0.808217	0.802384
0.741108	0.533475	0.601119	0.590344		0.623627	1.01119	0.64952	0.823488		0.627573	0.538458	0.601119	0.590344		0.80823	0.601119	0.823488	0.590344		0.697943	0.890621	0.787584	1.01119	0.80823	0.823488
0.747418	0.534294	0.60439	0.597197		0.629754	1.02442	0.649612	0.829397		0.628062	0.544492	0.60439	0.597197		0.815714	0.60439	0.829397	0.597197		0.700604	0.902305	0.797048	1.02442	0.815714	0.829397
0.757397	0.541106	0.608473	0.598268		0.637519	1.0258	0.649809	0.831311		0.629218	0.552764	0.608473	0.598268		0.830614	0.608473	0.831311	0.598268		0.705699	0.904452	0.798216	1.0258	0.830614	0.831311
0.784543	0.547966	0.609393	0.604808		0.639347	1.04625	0.660258	0.832974		0.630403	0.553423	0.609393	0.604808		0.838604	0.609393	0.832974	0.604808		0.719316	0.905658	0.808569	1.04625	0.838604	0.832974
0.801688	0.551341	0.612676	0.605763		0.642138	1.05153	0.683168	0.835577		0.633965	0.553832	0.612676	0.605763		0.843202	0.612676	0.835577	0.605763		0.742804	0.91884	0.813093	1.05153	0.843202	0.835577
0.814725	0.557038	0.613245	0.60916		0.651386	1.09435	0.713745	0.835597		0.673977	0.562584	0.613245	0.60916		0.850681	0.613245	0.835597	0.60916		0.766659	0.93144	0.813499	1.09435	0.850681	0.835597
0.81683	0.560542	0.614977	0.613633		0.653884	1.10224	0.718411	0.835599		0.699447	0.568143	0.614977	0.613633		0.855834	0.614977	0.835599	0.613633		0.791736	0.937939	0.823148	1.10224	0.855834	0.835599
0.819048	0.562854	0.616615	0.615541		0.654285	1.12507	0.722175	0.838851		0.704144	0.570247	0.616615	0.615541		0.856659	0.616615	0.838851	0.615541		0.792792	0.978825	0.841621	1.12507	0.856659	0.838851
0.820766	0.563628	0.619308	0.617144		0.663109	1.12983	0.759744	0.844778		0.711756	0.572097	0.619308	0.617144		0.857987	0.619308	0.844778	0.617144		0.797268	0.984232	0.850813	1.12983	0.857987	0.844778
0.828621	0.566037	0.62599	0.624527		0.663914	1.14081	0.760814	0.847683		0.715676	0.572703	0.62599	0.624527		0.860545	0.62599	0.847683	0.624527		0.800394	0.995798	0.85321	1.14081	0.860545	0.847683
0.831989	0.570821	0.627798	0.625454		0.677577	1.16671	0.761784	0.851739		0.716374	0.573069	0.627798	0.625454		0.877234	0.627798	0.851739	0.625454		0.804671	1.008	0.859511	1.16671	0.877234	0.851739
0.839073	0.572822	0.628513	0.629054		0.678371	1.17549	0.774114	0.852181		0.725415	0.573276	0.628513	0.629054		0.894005	0.628513	0.852181	0.629054		0.815562	1.01502	0.870834	1.17549	0.894005	0.852181
0.84122	0.573333	0.630402	0.635871		0.680092	1.19884	0.786937	0.85335		0.742053	0.587954	0.630402	0.635871		0.89406	0.630402	0.85335	0.635871		0.90979	1.02043	0.872057	1.19884	0.89406	0.85335
0.859368	0.574915	0.631153	0.636666		0.688574	1.20844	0.794358	0.85445		0.746722	0.59181	0.631153	0.636666		0.902654	0.631153	0.85445	0.636666		0.931222	1.022	0.874895	1.20844	0.902654	0.85445
0.87747	0.577519	0.635207	0.638662		0.692742	1.21333	0.799165	0.856618		0.750593	0.592745	0.635207	0.638662		0.906621	0.635207	0.856618	0.638662		0.937589	1.02609	0.877782	1.21333	0.906621	0.856618
0.889785	0.578924	0.638769	0.642405		0.695375	1.23337	0.809239	0.860602		0.754773	0.607854	0.638769	0.642405		0.91014	0.638769	0.860602	0.642405		0.94999	1.02792	0.881632	1.23337	0.91014	0.860602
0.904627	0.587968	0.639768	0.646833		0.695653	1.24021	0.818749	0.862539		0.760351	0.61645	0.639768	0.646833		0.910165	0.639768	0.862539	0.646833		0.971492	1.05012	0.886438	1.24021	0.910165	0.862539
0.910129	0.588527	0.641231	0.650001		0.696964	1.25367	0.827873	0.871819		0.763396	0.616466	0.641231	0.650001		0.915922	0.641231	0.871819	0.650001		0.989518	1.06335	0.888171	1.25367	0.915922	0.871819
0.917232	0.601412	0.654344	0.651736		0.69842	1.25523	0.837996	0.8719		0.784106	0.619177	0.654344	0.651736		0.925455	0.654344	0.8719	0.651736		0.996861	1.0636	0.889776	1.25523	0.925455	0.8719
0.932204	0.603089	0.654541	0.660401		0.699806	1.27022	0.844887	0.87643		0.790307	0.635442	0.654541	0.660401		0.943649	0.654541	0.87643	0.660401		1.01174	1.07181	0.891301	1.27022	0.943649	0.87643
0.933204	0.605845	0.66129	0.666119		0.70965	1.28507	0.854091	0.87869		0.79492	0.63635	0.66129	0.666119		0.9437	0.66129	0.87869	0.666119		1.03517	1.07439	0.897745	1.28507	0.9437	0.87869
0.93451	0.619266	0.664372	0.666673		0.714529	1.28637	0.855005	0.888275		0.803925	0.641268	0.664372	0.666673		0.951476	0.664372	0.888275	0.666673		1.04054	1.07567	0.898982	1.28637	0.951476	0.888275
0.935005	0.624192	0.670167	0.667255		0.715216	1.36162	0.870613	0.89489		0.80987	0.646466	0.670167	0.667255		0.951706	0.670167	0.89489	0.667255		1.09565	1.08271	0.902523	1.36162	0.951706	0.89489
0.945607	0.624528	0.671589	0.672183		0.715279	1.42673	0.87118	0.896931		0.816476	0.646895	0.671589	0.672183		0.959972	0.671589	0.896931	0.672183		1.40689	1.11007	0.906519	1.42673	0.959972	0.896931
0.949029	0.635645	0.673476	0.672876		0.715426	1.43162	0.915181	0.901104		0.819322	0.647327	0.673476	0.672876		0.964411	0.673476	0.901104	0.672876		0.455367	1.11196	0.908641	1.43162	0.964411	0.901104
0.950721	0.635744	0.679415	0.679565		0.715747	1.44113	0.941738	0.904978		0.838864	0.6477	0.679415	0.679565		0.976106	0.679415	0.904978	0.679565		0.53542	1.11908	0.910844	1.44113	0.976106	0.904978
0.988427	0.639166	0.680282	0.68559		0.717218	1.54963	0.946947	0.906482		0.838886	0.651697	0.680282	0.68559		0.980052	0.680282	0.906482	0.68559		0.642241	1.13453	0.913087	1.54963	0.980052	0.906482
0.994937	0.649711	0.681843	0.688789		0.71833	1.58539	0.947655	0.909817		0.848255	0.652683	0.681843	0.688789		0.989913	0.681843	0.909817	0.688789		0.682038	1.15129	0.918403	1.58539	0.989913	0.909817
0.999048	0.651589	0.681951	0.690741		0.722428	1.63295	1.09818	0.918314		0.864198	0.653726	0.681951	0.690741		0.992501	0.681951	0.918314	0.690741		0.704417	1.1917	0.93	1.63295	0.992501	0.918314
1.0162	0.65336	0.686152	0.693852		0.72429	0.595392	0.433445	0.918767		0.889652	0.654584	0.686152	0.693852		0.995333	0.686152	0.918767	0.693852		0.710802	1.1979	0.938341	0.595392	0.995333	0.918767
1.02896	0.656983	0.688959	0.694812		0.727863	0.643325	0.4539	0.919119		0.894038	0.654637	0.688959	0.694812		1.01231	0.688959	0.919119	0.694812		0.714284	1.19929	0.942282	0.643325	1.01231	0.919119
1.03944	0.660536	0.689163	0.699518		0.73323	0.664669	0.562727	0.921767		0.961599	0.660748	0.689163	0.699518		1.01427	0.689163	0.921767	0.699518		0.715726	1.20163	0.949353	0.664669	1.01427	0.921767
1.04914	0.662928	0.689802	0.703111		0.736185	0.703905	0.566797	0.926217		0.964955	0.668634	0.689802	0.703111		1.01819	0.689802	0.926217	0.703111		0.716292	1.2054	0.950828	0.703905	1.01819	0.926217
1.10241	0.664894	0.690426	0.704697		0.739736	0.747011	0.57972	0.927683		0.965528	0.669477	0.690426	0.704697		1.07006	0.690426	0.927683	0.704697		0.718921	1.2119	0.959396	0.747011	1.07006	0.927683
1.17295	0.670441	0.691907	0.705879		0.746223	0.755152	0.583363	0.950228		0.998734	0.673304	0.691907	0.705879		1.11399	0.691907	0.950228	0.705879		0.755218	1.21239	0.960421	0.755152	1.11399	0.950228
1.20088	0.676472	0.693624	0.707031		0.750553	0.769414	0.591748	0.954172		1.01605	0.674016	0.693624	0.707031		1.16933	0.693624	0.954172	0.707031		0.759687	1.2296	0.963682	0.769414	1.16933	0.954172
1.28282	0.68383	0.700979	0.709129		0.760848	0.775591	0.606883	0.955789		1.03509	0.677522	0.700979	0.709129		1.18346	0.700979	0.955789	0.709129		0.76296	1.24967	0.964244	0.775591	1.18346	0.955789
1.29925	0.68643	0.701056	0.709832		0.763445	0.794785	0.613149	0.959304		1.10194	0.683509	0.701056	0.709832		1.19661	0.701056	0.959304	0.709832		0.776678	1.2566	0.970367	0.794785	1.19661	0.959304
1.4444	0.686764	0.704882	0.71341		0.765964	0.808819	0.615954	0.96633		0.424279	0.68793	0.704882	0.71341		1.22443	0.704882	0.96633	0.71341		0.784456	1.25885	0.97908	0.808819	1.22443	0.96633
1.50916	0.687951	0.705846	0.718519		0.767428	0.810444	0.621602	0.968239		0.468396	0.688988	0.705846	0.718519		1.246	0.705846	0.968239	0.718519		0.784835	1.27125	0.979933	0.810444	1.246	0.968239
1.66143	0.692514	0.706789	0.720209		0.771188	0.814459	0.637117	0.971076		0.508752	0.690531	0.706789	0.720209		0.558186	0.706789	0.971076	0.720209		0.785091	1.28237	0.980524	0.814459	0.558186	0.971076
0.367893	0.695507	0.708137	0.725568		0.776032	0.816726	0.641547	0.972397		0.518176	0.690744	0.708137	0.725568		0.565007	0.708137	0.972397	0.725568		0.816718	1.32117	0.98542	0.816726	0.565007	0.972397
0.395396	0.69865	0.710401	0.733185		0.776558	0.826536	0.662593	0.973111		0.538817	0.692754	0.710401	0.733185		0.594521	0.710401	0.973111	0.733185		0.819019	1.33149	0.997965	0.826536	0.594521	0.973111
0.423566	0.701593	0.710894	0.734465		0.777128	0.833716	0.69533	0.980664		0.544398	0.695369	0.710894	0.734465		0.613561	0.710894	0.980664	0.734465		0.823911	1.3342	1.00826	0.833716	0.613561	0.980664
0.470146	0.704379	0.711374	0.734985		0.777632	0.843262	0.702894	0.987634		0.561878	0.70206	0.711374	0.734985		0.663321	0.711374	0.987634	0.734985		0.830097	1.33433	1.00883	0.843262	0.663321	0.987634
0.485527	0.708281	0.712327	0.736589		0.778718	0.846111	0.706327	0.990888		0.563431	0.704837	0.712327	0.736589		0.700699	0.712327	0.990888	0.736589		0.875364	1.34681	1.01391	0.846111	0.700699	0.990888
0.521279	0.712581	0.715914	0.736778		0.790975	0.862842	0.714886	0.992997		0.566299	0.71645	0.715914	0.736778		0.706302	0.715914	0.992997	0.736778		0.875684	1.36219	1.02281	0.862842	0.706302	0.992997
0.53272	0.713169	0.71973	0.738839		0.793905	0.867462	0.744272	0.994042		0.585897	0.717488	0.71973	0.738839		0.727561	0.71973	0.994042	0.738839		0.878822	1.37664	1.02675	0.867462	0.727561	0.994042
0.546161	0.717888	0.71975	0.743271		0.8	0.880914	0.778581	0.99841		0.590316	0.717777	0.71975	0.743271		0.782438	0.71975	0.99841	0.743271		0.88236	1.3805	1.02761	0.880914	0.782438	0.99841
0.556864	0.72017	0.720756	0.745429		0.800379	0.882846	0.782573	0.99874		0.591524	0.723424	0.720756	0.745429		0.782946	0.720756	0.99874	0.745429		0.884331	1.38683	1.04015	0.882846	0.782946	0.99874
0.573132	0.727051	0.723695	0.74638		0.80989	0.889724	0.827635	1.0048		0.608108	0.723911	0.723695	0.74638		0.783029	0.723695	1.0048	0.74638		0.885531	1.39729	1.04379	0.889724	0.783029	1.0048
0.613322	0.728581	0.726384	0.7473		0.820817	0.890468	0.828071	1.00895		0.614987	0.723981	0.726384	0.7473		0.800086	0.726384	1.00895	0.7473		0.890378	1.4	1.04558	0.890468	0.800086	1.00895
0.648138	0.732572	0.72768	0.747531		0.845277	0.893186	0.829259	1.01226		0.615316	0.730544	0.72768	0.747531		0.817701	0.72768	1.01226	0.747531		0.893736	1.42107	1.04585	0.893186	0.817701	1.01226
0.666828	0.742883	0.728895	0.748605		0.858355	0.893632	0.84345	1.01231		0.618702	0.730711	0.728895	0.748605		0.818926	0.728895	1.01231	0.748605		0.894545	1.42364	1.04985	0.893632	0.818926	1.01231
0.677316	0.746167	0.729795	0.749054		0.875542	0.909119	0.856504	1.01289		0.627529	0.73148	0.729795	0.749054		0.81925	0.729795	1.01289	0.749054		0.903501	1.43477	1.05343	0.909119	0.81925	1.01289
0.694203	0.746679	0.730501	0.751807		0.893449	0.918402	0.891837	1.01605		0.631989	0.733957	0.730501	0.751807		0.880315	0.730501	1.01605	0.751807		0.907954	1.45035	1.0541	0.918402	0.880315	1.01605
0.694771	0.751839	0.730538	0.764338		0.919482	0.920422	0.90591	1.01747		0.649982	0.735371	0.730538	0.764338		0.880343	0.730538	1.01747	0.764338		0.9124	1.46193	1.05839	0.920422	0.880343	1.01747
0.695969	0.756673	0.734835	0.767078		0.928367	0.9315	0.934308	1.02306		0.65182	0.738178	0.734835	0.767078		0.890556	0.734835	1.02306	0.767078		0.925327	1.46269	1.06108	0.9315	0.890556	1.02306
0.706744	0.763232	0.73812	0.767552		0.933507	0.946969	0.95654	1.02541		0.65252	0.739235	0.73812	0.767552		0.899138	0.73812	1.02541	0.767552		0.970933	1.47907	1.06185	0.946969	0.899138	1.02541
0.710453	0.772239	0.739221	0.769764		0.93532	0.952464	0.95971	1.03408		0.672525	0.741278	0.739221	0.769764		0.901932	0.739221	1.03408	0.769764		0.995551	1.48959	1.06338	0.952464	0.901932	1.03408
0.722767	0.777214	0.745126	0.773367		0.936434	0.952605	0.965095	1.03744		0.674034	0.745426	0.745126	0.773367		0.915826	0.745126	1.03744	0.773367		1.07191	1.50148	1.06456	0.952605	0.915826	1.03744
0.728768	0.77741	0.748011	0.775089		0.940884	0.955675	0.975612	1.04079		0.696876	0.747284	0.748011	0.775089		0.927467	0.748011	1.04079	0.775089		1.13641	1.5031	1.06856	0.955675	0.927467	1.04079
0.735381	0.782056	0.749509	0.779689		0.955829	0.957954	1.0158	1.04091		0.730123	0.75189	0.749509	0.779689		0.932134	0.749509	1.04091	0.779689		1.14461	1.50429	1.08221	0.957954	0.932134	1.04091
0.759896	0.785545	0.75087	0.784972		0.958125	0.960131	0.422949	1.04098		0.73616	0.752313	0.75087	0.784972		0.94127	0.75087	1.04098	0.784972		1.18403	1.50834	1.08583	0.960131	0.94127	1.04098
0.760889	0.805662	0.753165	0.787343		0.960067	0.960854	0.492723	1.04166		0.744022	0.754687	0.753165	0.787343		0.952508	0.753165	1.04166	0.787343		1.49335	1.50851	1.08884	0.960854	0.952508	1.04166
0.77576	0.809249	0.755286	0.797946		0.968649	0.961096	0.501765	1.04184		0.753676	0.755769	0.755286	0.797946		0.959474	0.755286	1.04184	0.797946			1.51002	1.08942	0.961096	0.959474	1.04184
0.777061	0.810988	0.756451	0.799128		0.976823	0.963141	0.522164	1.04489		0.762007	0.757572	0.756451	0.799128		0.96295	0.756451	1.04489	0.799128			1.52545	1.09208	0.963141	0.96295	1.04489
0.780042	0.813521	0.759435	0.799761		0.986113	0.964524	0.523615	1.04637		0.785386	0.763426	0.759435	0.799761		0.969168	0.759435	1.04637	0.799761			1.55227	1.09262	0.964524	0.969168	1.04637
0.783375	0.821347	0.762318	0.802448		1.0214	0.964851	0.534896	1.05492		0.796787	0.765438	0.762318	0.802448		0.977205	0.762318	1.05492	0.802448			1.57665	1.09621	0.964851	0.977205	1.05492
0.785551	0.830342	0.763218	0.807196		1.03578	0.964851	0.551225	1.05796		0.798464	0.766057	0.763218	0.807196		0.981595	0.763218	1.05796	0.807196			1.60704	1.09889	0.964851	0.981595	1.05796
0.789111	0.831844	0.767562	0.807612		1.04746	0.971517	0.555478	1.05874		0.800153	0.766486	0.767562	0.807612		0.989686	0.767562	1.05874	0.807612			1.64581	1.10335	0.971517	0.989686	1.05874
0.791744	0.832454	0.769944	0.814322		1.06175	0.974562	0.559693	1.06777		0.809889	0.771405	0.769944	0.814322		0.994746	0.769944	1.06777	0.814322			1.7032	1.1096	0.974562	0.994746	1.06777
0.799247	0.835569	0.772511	0.821648		1.07768	0.977216	0.561385	1.07572		0.845907	0.772052	0.772511	0.821648		1	0.772511	1.07572	0.821648			1.77532	1.11876	0.977216	1	1.07572
0.807243	0.851169	0.774249	0.838491		1.08886	0.978298	0.577482	1.08344		0.850874	0.795957	0.774249	0.838491		1.00287	0.774249	1.08344	0.838491			1.79889	1.14102	0.978298	1.00287	1.08344
0.809781	0.85876	0.776244	0.841507		1.14539	0.979537	0.585037	1.08713		0.852231	0.796784	0.776244	0.841507		1.00735	0.776244	1.08713	0.841507			1.84607	1.1622	0.979537	1.00735	1.08713
0.81266	0.881713	0.777045	0.842359		1.18826	0.984729	0.587138	1.0914		0.859012	0.799181	0.777045	0.842359		1.061	0.777045	1.0914	0.842359			1.84639	1.16368	0.984729	1.061	1.0914
0.820238	0.882513	0.777135	0.845143		0.499439	0.986405	0.594926	1.11241		0.882335	0.805893	0.777135	0.845143		1.09613	0.777135	1.11241	0.845143			1.86758	1.18206	0.986405	1.09613	1.11241
0.8205	0.893137	0.778101	0.845209		0.520388	0.989918	0.601835	1.11272		0.885916	0.807504	0.778101	0.845209		1.13962	0.778101	1.11272	0.845209			1.89756	1.18691	0.989918	1.13962	1.11272
0.826092	0.899811	0.778886	0.8477		0.522886	0.9952	0.605227	1.11549		0.903393	0.822152	0.778886	0.8477		1.18686	0.778886	1.11549	0.8477			1.96104	1.19115	0.9952	1.18686	1.11549
0.827893	0.905257	0.782511	0.855392		0.547261	0.996373	0.609643	1.11758		0.905602	0.831309	0.782511	0.855392		1.26219	0.782511	1.11758	0.855392			0.557521	1.20091	0.996373	1.26219	1.11758
0.828203	0.906594	0.782774	0.860459		0.551625	0.996807	0.618194	1.11928		0.910352	0.83301	0.782774	0.860459		1.27725	0.782774	1.11928	0.860459			0.613452	1.20149	0.996807	1.27725	1.11928
0.829734	0.910578	0.783258	0.86191		0.570098	0.999381	0.621794	1.15011		0.932647	0.834853	0.783258	0.86191		1.27896	0.783258	1.15011	0.86191			0.645311	1.2051	0.999381	1.27896	1.15011
0.830131	0.911374	0.784807	0.868844		0.572442	0.999535	0.627171	1.16951		0.942387	0.837497	0.784807	0.868844		0.539755	0.784807	1.16951	0.868844			0.767991	1.20718	0.999535	0.539755	1.16951
0.830943	0.924406	0.786481	0.87901		0.582906	1	0.628212	1.1736		0.955065	0.841177	0.786481	0.87901		0.603777	0.786481	1.1736	0.87901			0.79673	1.2132	1	0.603777	1.1736
0.83167	0.986868	0.791778	0.884775		0.583921	1.0042	0.62917	1.17412		0.955882	0.846565	0.791778	0.884775		0.621633	0.791778	1.17412	0.884775			0.803156	1.21896	1.0042	0.621633	1.17412
0.834636	1	0.795014	0.885612		0.591266	1.00422	0.631442	1.17754		0.976887	0.850299	0.795014	0.885612		0.658687	0.795014	1.17754	0.885612			0.816351	1.21987	1.00422	0.658687	1.17754
0.837702	1.03042	0.795211	0.888684		0.592602	1.01347	0.637855	1.18137		0.977999	0.851063	0.795211	0.888684		0.666992	0.795211	1.18137	0.888684			0.825397	1.22496	1.01347	0.666992	1.18137
0.849733	1.13326	0.795735	0.899911		0.596155	1.01492	0.640268	1.18162		0.979453	0.866146	0.795735	0.899911		0.677392	0.795735	1.18162	0.899911			0.832304	1.22786	1.01492	0.677392	1.18162
0.86195	1.15991	0.796541	0.910713		0.597433	1.02571	0.64162	1.19276		0.982834	0.867117	0.796541	0.910713		0.677944	0.796541	1.19276	0.910713			0.836117	1.23899	1.02571	0.677944	1.19276
0.865871	0.3219	0.797289	0.960854		0.597704	1.04748	0.650481	1.19507		1.05876	0.869364	0.797289	0.960854		0.678439	0.797289	1.19507	0.960854			0.837209	1.24051	1.04748	0.678439	1.19507
0.873901	0.356249	0.799252	0.962724		0.598063	1.05184	0.65621	1.20308		1.06557	0.872132	0.799252	0.962724		0.685413	0.799252	1.20308	0.962724			0.840935	1.24407	1.05184	0.685413	1.20308
0.875761	0.387804	0.801666	0.972351		0.611108	1.06568	0.657229	1.20525		1.07491	0.894553	0.801666	0.972351		0.688318	0.801666	1.20525	0.972351			0.845438	1.25178	1.06568	0.688318	1.20525
0.878141	0.394685	0.802357	0.980806		0.619144	1.07297	0.657407	1.20559		0.345985	0.895885	0.802357	0.980806		0.723936	0.802357	1.20559	0.980806			0.882914	1.27375	1.07297	0.723936	1.20559
0.882081	0.397615	0.802428	0.988629		0.628622	1.07986	0.672638	1.21627		0.357299	0.896852	0.802428	0.988629		0.745922	0.802428	1.21627	0.988629			0.904787	1.29393	1.07986	0.745922	1.21627
0.883525	0.416344	0.803717	1.01655		0.63045	1.10408	0.676658	1.22279		0.438751	0.897133	0.803717	1.01655		0.756212	0.803717	1.22279	1.01655			0.909565	1.30701	1.10408	0.756212	1.22279
0.884408	0.419776	0.806261	1.02368		0.637774	1.12577	0.693257	1.23801		0.439468	0.901802	0.806261	1.02368		0.765962	0.806261	1.23801	1.02368			0.926289	1.31781	1.12577	0.765962	1.23801
0.885688	0.438539	0.811579	1.03281		0.64445	1.13162	0.698155	1.24327		0.453151	0.912429	0.811579	1.03281		0.775015	0.811579	1.24327	1.03281			0.931709	1.32119	1.13162	0.775015	1.24327
0.886158	0.45162	0.812201	1.07228		0.651253	1.1577	0.714956	1.26349		0.488258	0.932911	0.812201	1.07228		0.777208	0.812201	1.26349	1.07228			0.932183	1.32344	1.1577	0.777208	1.26349
0.887881	0.468769	0.815248	1.09377		0.656199	1.15993	0.719068	1.26578		0.492916	0.95702	0.815248	1.09377		0.789834	0.815248	1.26578	1.09377			0.937545	1.32575	1.15993	0.789834	1.26578
0.895433	0.473047	0.815329	1.11015		0.658461	1.16304	0.744561	1.26879		0.505576	0.959702	0.815329	1.11015		0.79129	0.815329	1.26879	1.11015			0.953029	1.32749	1.16304	0.79129	1.26879
0.900258	0.479759	0.816846	1.11884		0.667252	1.17304	0.763079	1.30074		0.521682	0.961919	0.816846	1.11884		0.802083	0.816846	1.30074	1.11884			0.957661	1.32802	1.17304	0.802083	1.30074
0.917099	0.480001	0.818297	1.18138		0.684458	1.20438	0.765001	1.30749		0.551032	0.965705	0.818297	1.18138		0.804886	0.818297	1.30749	1.18138			0.961592	1.3705	1.20438	0.804886	1.30749
0.920989	0.496771	0.819749	0.304173		0.685001	1.21203	0.782218	1.34587		0.55475	0.967132	0.819749	0.304173		0.810472	0.819749	1.34587	0.304173			0.963367	1.37209	1.21203	0.810472	1.34587
0.921003	0.512935	0.821679	0.361729		0.689096	1.21653	0.783734	1.35369		0.555562	0.978589	0.821679	0.361729		0.815689	0.821679	1.35369	0.361729			0.963525	1.37722	1.21653	0.815689	1.35369
0.921567	0.518622	0.822809	0.385079		0.68969	1.22901	0.786325	1.35809		0.563489	0.979088	0.822809	0.385079		0.818689	0.822809	1.35809	0.385079			0.992141	1.38861	1.22901	0.818689	1.35809
0.925705	0.518938	0.829196	0.415001		0.691785	1.23153	0.789019	1.36129		0.573945	0.986274	0.829196	0.415001		0.824065	0.829196	1.36129	0.415001			0.994813	1.44632	1.23153	0.824065	1.36129
0.935531	0.519504	0.829998	0.445489		0.69391	1.23826	0.791805	1.37592		0.579358	0.992666	0.829998	0.445489		0.828494	0.829998	1.37592	0.445489			0.997578	1.47884	1.23826	0.828494	1.37592
0.946083	0.531274	0.830582	0.452173		0.69517	1.26488	0.793161	1.3888		0.589188	0.994393	0.830582	0.452173		0.829212	0.830582	1.3888	0.452173			1.00567	1.5017	1.26488	0.829212	1.3888
0.966961	0.537124	0.833708	0.455128		0.699951	1.2761	0.805256	1.4171		0.593146	1.01283	0.833708	0.455128		0.832231	0.833708	1.4171	0.455128			1.01133	1.52072	1.2761	0.832231	1.4171
0.968077	0.538937	0.834659	0.458787		0.702651	1.29073	0.832283	1.42436		0.596564	1.0208	0.834659	0.458787		0.855322	0.834659	1.42436	0.458787			1.02345	1.52768	1.29073	0.855322	1.42436
0.975789	0.544163	0.835694	0.458916		0.709832	1.31308	0.839614	1.42815		0.598926	1.02857	0.835694	0.458916		0.855904	0.835694	1.42815	0.458916			1.02494	1.53505	1.31308	0.855904	1.42815
0.976481	0.545906	0.835944	0.45994		0.710333	1.33169	0.840831	1.44556		0.612716	1.04458	0.835944	0.45994		0.86346	0.835944	1.44556	0.45994			1.03259	1.60702	1.33169	0.86346	1.44556
1.0006	0.551594	0.837098	0.46068		0.711092	1.35292	0.842201	1.44911		0.617503	1.05697	0.837098	0.46068		0.866075	0.837098	1.44911	0.46068			1.03329	1.81838	1.35292	0.866075	1.44911
1.00515	0.554904	0.841513	0.46243		0.713256	1.39417	0.843901	1.51143		0.62334	1.07878	0.841513	0.46243		0.874179	0.841513	1.51143	0.46243			1.03332	0.498222	1.39417	0.874179	1.51143
1.01211	0.558044	0.84511	0.466474		0.71638	1.39878	0.881611	1.52864		0.643665	1.30166	0.84511	0.466474		0.874756	0.84511	1.52864	0.466474			1.04098	0.567435	1.39878	0.874756	1.52864
1.05423	0.560319	0.845384	0.470188		0.720061	1.42466	0.883796	1.56859		0.644822	1.38457	0.845384	0.470188		0.919464	0.845384	1.56859	0.470188			1.04231	0.581359	1.42466	0.919464	1.56859
1.11145	0.560914	0.848311	0.474968		0.742246	1.43886	0.897011	1.63136		0.647995	0.379309	0.848311	0.474968		0.92105	0.848311	1.63136	0.474968			1.05661	0.599743	1.43886	0.92105	1.63136
1.79154	0.565177	0.84897	0.484687		0.74671	1.52821	0.913709	1.96131		0.653656	0.393137	0.84897	0.484687		0.931463	0.84897	1.96131	0.484687			1.06644	0.625175	1.52821	0.931463	1.96131
	0.572465	0.849668	0.491539		0.766569	1.60327	0.947737	0.41841		0.658018	0.397233	0.849668	0.491539		0.935845	0.849668	0.41841	0.491539			1.0712	0.642859	1.60327	0.935845	0.41841
	0.573579	0.851092	0.493734		0.766586	1.68587	0.954596	0.444525		0.675636	0.406555	0.851092	0.493734		0.937315	0.851092	0.444525	0.493734			1.07121	0.664248	1.68587	0.937315	0.444525
	0.575276	0.857021	0.498125		0.769863	0.797832	0.978852	0.477955		0.681287	0.41002	0.857021	0.498125		0.93763	0.857021	0.477955	0.498125			1.08306	0.672213	0.797832	0.93763	0.477955
	0.578262	0.857893	0.50263		0.774893	0.817318	1.00265	0.515811		0.682328	0.445206	0.857893	0.50263		0.945092	0.857893	0.515811	0.50263			1.09154	0.680227	0.817318	0.945092	0.515811
	0.580763	0.859292	0.504781		0.77553	0.867853		0.542473		0.684322	0.445206	0.859292	0.504781		0.95319	0.859292	0.542473	0.504781			1.09314	0.687497	0.867853	0.95319	0.542473
	0.584229	0.860608	0.506886		0.778314	0.869797		0.556214		0.690685	0.446769	0.860608	0.506886		0.954967	0.860608	0.556214	0.506886			1.09817	0.689146	0.869797	0.954967	0.556214
	0.58455	0.863472	0.508882		0.780961	0.880518		0.55874		0.691412	0.464586	0.863472	0.508882		0.955316	0.863472	0.55874	0.508882			1.10391	0.713703	0.880518	0.955316	0.55874
	0.586092	0.865067	0.512385		0.782001	0.88515		0.560355		0.702017	0.474317	0.865067	0.512385		0.961365	0.865067	0.560355	0.512385			1.10545	0.714599	0.88515	0.961365	0.560355
	0.588959	0.865268	0.513272		0.792316	0.926011		0.562853		0.704411	0.49875	0.865268	0.513272		0.97348	0.865268	0.562853	0.513272			1.15115	0.736613	0.926011	0.97348	0.562853
	0.593842	0.865559	0.51655		0.795391	0.949709		0.577277		0.716481	0.513609	0.865559	0.51655		0.976387	0.865559	0.577277	0.51655			1.16073	0.741454	0.949709	0.976387	0.577277
	0.594693	0.869208	0.518459		0.804407	1.00803		0.611645		0.721086	0.516608	0.869208	0.518459		0.988794	0.869208	0.611645	0.518459			1.16606	0.748154	1.00803	0.988794	0.611645
	0.595184	0.87356	0.518519		0.804767	1.01039		0.614196		0.723505	0.5229	0.87356	0.518519		0.99166	0.87356	0.614196	0.518519			1.16867	0.753576	1.01039	0.99166	0.614196
	0.596925	0.873589	0.520099		0.813502	1.01904		0.618661		0.75	0.535965	0.873589	0.520099		0.994025	0.873589	0.618661	0.520099			1.17592	0.754553	1.01904	0.994025	0.618661
	0.598523	0.875265	0.521191		0.82166	1.0209		0.627322		0.75604	0.536657	0.875265	0.521191		0.997347	0.875265	0.627322	0.521191			1.1766	0.760045	1.0209	0.997347	0.627322
	0.60595	0.875493	0.530889		0.827764	1.02942		0.632912		0.7666	0.539356	0.875493	0.530889		0.9987	0.875493	0.632912	0.530889			1.20462	0.7817	1.02942	0.9987	0.632912
	0.607942	0.876763	0.534433		0.829234	1.03342		0.636215		0.767986	0.545331	0.876763	0.534433		0.999558	0.876763	0.636215	0.534433			1.20821	0.781819	1.03342	0.999558	0.636215
	0.624998	0.87847	0.540064		0.839172	1.05014		0.649493		0.786374	0.546207	0.87847	0.540064		1.00038	0.87847	0.649493	0.540064			1.23634	0.79407	1.05014	1.00038	0.649493
	0.625884	0.881863	0.541241		0.84651	1.05249		0.651718		0.789051	0.550733	0.881863	0.541241		1.00153	0.881863	0.651718	0.541241			1.24653	0.798192	1.05249	1.00153	0.651718
	0.631356	0.882899	0.550694		0.854827	1.05822		0.652905		0.793246	0.551902	0.882899	0.550694		1.00405	0.882899	0.652905	0.550694			1.24801	0.801201	1.05822	1.00405	0.652905
	0.635149	0.883414	0.55268		0.856022	1.0676		0.667011		0.803735	0.573408	0.883414	0.55268		1.00662	0.883414	0.667011	0.55268			1.2502	0.808755	1.0676	1.00662	0.667011
	0.636576	0.883817	0.553538		0.856645	1.08617		0.676572		0.804275	0.576526	0.883817	0.553538		1.01217	0.883817	0.676572	0.553538			1.26414	0.811469	1.08617	1.01217	0.676572
	0.637662	0.884015	0.554086		0.864004	1.10917		0.677199		0.804787	0.596842	0.884015	0.554086		1.01299	0.884015	0.677199	0.554086			1.28271	0.8133	1.10917	1.01299	0.677199
	0.640034	0.884526	0.554311		0.864903	1.11019		0.677539		0.808038	0.602516	0.884526	0.554311		1.01461	0.884526	0.677539	0.554311			1.28897	0.823143	1.11019	1.01461	0.677539
	0.645965	0.88609	0.555031		0.868781	1.11532		0.678433		0.810777	0.60655	0.88609	0.555031		1.01985	0.88609	0.678433	0.555031			1.29136	0.830637	1.11532	1.01985	0.678433
	0.648526	0.886138	0.557323		0.875657	1.12942		0.681148		0.821638	0.608507	0.886138	0.557323		1.02397	0.886138	0.681148	0.557323			1.29206	0.833062	1.12942	1.02397	0.681148
	0.648542	0.886991	0.55823		0.886223	1.13183		0.686595		0.838842	0.611596	0.886991	0.55823		1.0247	0.886991	0.686595	0.55823			1.31073	0.839092	1.13183	1.0247	0.686595
	0.661213	0.8879	0.563327		0.89878	1.15349		0.686977		0.849645	0.612448	0.8879	0.563327		1.02573	0.8879	0.686977	0.563327			1.32922	0.839376	1.15349	1.02573	0.686977
	0.66365	0.888351	0.5635		0.902983	1.1617		0.689044		0.860442	0.622717	0.888351	0.5635		1.02787	0.888351	0.689044	0.5635			1.33895	0.842781	1.1617	1.02787	0.689044
	0.665387	0.889323	0.569142		0.908246	1.16425		0.695504		0.866546	0.6257	0.889323	0.569142		1.03072	0.889323	0.695504	0.569142			1.33987	0.844423	1.16425	1.03072	0.695504
	0.665807	0.890013	0.571024		0.91456	1.16872		0.697085		0.871027	0.626672	0.890013	0.571024		1.03246	0.890013	0.697085	0.571024			1.34721	0.845552	1.16872	1.03246	0.697085
	0.672289	0.890173	0.571978		0.919831	1.1769		0.698736		0.874761	0.628157	0.890173	0.571978		1.03717	0.890173	0.698736	0.571978			1.34836	0.846867	1.1769	1.03717	0.698736
	0.67637	0.89972	0.573301		0.929829	1.20614		0.699609		0.877876	0.628746	0.89972	0.573301		1.05173	0.89972	0.699609	0.573301			1.35392	0.849012	1.20614	1.05173	0.699609
	0.680214	0.90037	0.573333		0.930209	1.20957		0.701546		0.877931	0.629519	0.90037	0.573333		1.06219	0.90037	0.701546	0.573333			1.357	0.853097	1.20957	1.06219	0.701546
	0.682124	0.901308	0.575516		0.947203	1.21661		0.701847		0.881976	0.632365	0.901308	0.575516		1.07352	0.901308	0.701847	0.575516			1.36203	0.857027	1.21661	1.07352	0.701847
	0.690604	0.901747	0.578598		0.948638	1.21897		0.704114		0.892582	0.636905	0.901747	0.578598		1.07462	0.901747	0.704114	0.578598			1.36277	0.858738	1.21897	1.07462	0.704114
	0.690922	0.903529	0.579312		0.95007	1.21991		0.708928		0.895485	0.63926	0.903529	0.579312		1.07819	0.903529	0.708928	0.579312			1.37195	0.864389	1.21991	1.07819	0.708928
	0.691012	0.9042	0.583151		0.954213	1.2322		0.710584		0.903919	0.639954	0.9042	0.583151		1.08302	0.9042	0.710584	0.583151			1.38564	0.869209	1.2322	1.08302	0.710584
	0.691424	0.909075	0.583905		0.955286	1.2423		0.716026		0.905051	0.649827	0.909075	0.583905		1.11251	0.909075	0.716026	0.583905			1.40092	0.87349	1.2423	1.11251	0.716026
	0.692678	0.910293	0.584455		0.958933	1.24805		0.718544		0.907502	0.657695	0.910293	0.584455		1.11339	0.910293	0.718544	0.584455			1.40601	0.873572	1.24805	1.11339	0.718544
	0.702661	0.916394	0.585524		0.962801	1.28251		0.721932		0.917771	0.662122	0.916394	0.585524		1.11989	0.916394	0.721932	0.585524			1.40727	0.874374	1.28251	1.11989	0.721932
	0.703578	0.919092	0.586939		0.962803	1.30629		0.722802		0.922619	0.664826	0.919092	0.586939		1.17826	0.919092	0.722802	0.586939			1.42744	0.874948	1.30629	1.17826	0.722802
	0.703832	0.920308	0.588299		0.96298	1.32154		0.723376		0.922678	0.670416	0.920308	0.588299		1.18691	0.920308	0.723376	0.588299			1.45488	0.876849	1.32154	1.18691	0.723376
	0.709922	0.920353	0.590016		0.971053	1.35183		0.723894		0.924541	0.670469	0.920353	0.590016		1.20023	0.920353	0.723894	0.590016			1.45568	0.881926	1.35183	1.20023	0.723894
	0.712136	0.926393	0.59003		0.973142	1.35868		0.727492		0.930739	0.67188	0.926393	0.59003		1.22977	0.926393	0.727492	0.59003			1.48522	0.885452	1.35868	1.22977	0.727492
	0.719446	0.938099	0.596125		0.974171	1.37218		0.72963		0.936256	0.676237	0.938099	0.596125		1.27134	0.938099	0.72963	0.596125			1.48822	0.88546	1.37218	1.27134	0.72963
	0.720557	0.939051	0.596904		0.976916	1.38725		0.738978		0.971643	0.685968	0.939051	0.596904		1.31143	0.939051	0.738978	0.596904			1.49638	0.886335	1.38725	1.31143	0.738978
	0.721852	0.939233	0.597092		0.982266	1.44046		0.740341		0.974249	0.687828	0.939233	0.597092		1.36252	0.939233	0.740341	0.597092			1.498	0.889232	1.44046	1.36252	0.740341
	0.724435	0.942652	0.597339		0.985304	1.46067		0.747309		0.974456	0.692968	0.942652	0.597339		1.37659	0.942652	0.747309	0.597339			1.50569	0.89873	1.46067	1.37659	0.747309
	0.726396	0.943316	0.597563		0.986241	1.49553		0.752195		0.976213	0.693175	0.943316	0.597563		1.49959	0.943316	0.752195	0.597563			1.52801	0.90138	1.49553	1.49959	0.752195
	0.728777	0.946086	0.598621		0.986964	1.49793		0.759561		0.988858	0.695755	0.946086	0.598621		0.596129	0.946086	0.759561	0.598621			1.53835	0.903776	1.49793	0.596129	0.759561
	0.733615	0.949589	0.598998		0.990748	1.51417		0.761055		0.998268	0.698935	0.949589	0.598998		0.616107	0.949589	0.761055	0.598998			1.54055	0.904243	1.51417	0.616107	0.761055
	0.73596	0.953043	0.600011		1.01992	1.52089		0.763737		1.04967	0.699691	0.953043	0.600011		0.653357	0.953043	0.763737	0.600011			1.54311	0.905735	1.52089	0.653357	0.763737
	0.737189	0.95451	0.60073		0.436326	1.64774		0.770418		1.14341	0.702031	0.95451	0.60073		0.661702	0.95451	0.770418	0.60073			1.55474	0.910005	1.64774	0.661702	0.770418
	0.737739	0.954824	0.600904		0.477031	1.79873		0.773914		1.1555	0.703461	0.954824	0.600904		0.672393	0.954824	0.773914	0.600904			1.55719	0.92276	1.79873	0.672393	0.773914
	0.738485	0.955159	0.60307		0.514225			0.774566		1.17465	0.705329	0.955159	0.60307		0.673204	0.955159	0.774566	0.60307			1.56055	0.9228		0.673204	0.774566
	0.745708	0.955319	0.603179		0.5199			0.777909			0.712458	0.955319	0.603179		0.67363	0.955319	0.777909	0.603179			1.5959	0.925124		0.67363	0.777909
	0.746143	0.95618	0.603929		0.585683			0.793667			0.712808	0.95618	0.603929		0.680596	0.95618	0.793667	0.603929			1.60159	0.936291		0.680596	0.793667
	0.74753	0.958254	0.605296		0.600436			0.794515			0.721259	0.958254	0.605296		0.683797	0.958254	0.794515	0.605296			1.6228	0.93885		0.683797	0.794515
	0.769862	0.958787	0.605633		0.612645			0.795451			0.721751	0.958787	0.605633		0.684724	0.958787	0.795451	0.605633			1.69711	0.942754		0.684724	0.795451
	0.775558	0.960161	0.605897		0.616093			0.79643			0.721944	0.960161	0.605897		0.704702	0.960161	0.79643	0.605897			1.73807	0.94532		0.704702	0.79643
	0.775934	0.96072	0.606553		0.632055			0.797207			0.723319	0.96072	0.606553		0.706442	0.96072	0.797207	0.606553			1.79146	0.950817		0.706442	0.797207
	0.783503	0.96096	0.608003		0.635852			0.809781			0.724267	0.96096	0.608003		0.709847	0.96096	0.809781	0.608003			1.84317	0.952218		0.709847	0.809781
	0.784726	0.961342	0.61024		0.636985			0.809812			0.732201	0.961342	0.61024		0.712281	0.961342	0.809812	0.61024			1.93063	0.952235		0.712281	0.809812
	0.78642	0.962946	0.610273		0.648613			0.811571			0.734919	0.962946	0.610273		0.734204	0.962946	0.811571	0.610273			1.94101	0.953721		0.734204	0.811571
	0.786671	0.963658	0.61174		0.64866			0.812032			0.742386	0.963658	0.61174		0.741901	0.963658	0.812032	0.61174			1.9478	0.958629		0.741901	0.812032
	0.787056	0.965737	0.612937		0.652109			0.812789			0.746546	0.965737	0.612937		0.767185	0.965737	0.812789	0.612937			2.01874	0.962025		0.767185	0.812789
	0.79879	0.968097	0.613526		0.652697			0.813337			0.746805	0.968097	0.613526		0.778821	0.968097	0.813337	0.613526			2.04572	0.962148		0.778821	0.813337
	0.802654	0.968874	0.615043		0.658478			0.817066			0.750897	0.968874	0.615043		0.778985	0.968874	0.817066	0.615043			2.09241	0.978043		0.778985	0.817066
	0.80522	0.970487	0.617392		0.660511			0.824994			0.763384	0.970487	0.617392		0.780948	0.970487	0.824994	0.617392			2.5306	0.981447		0.780948	0.824994
	0.814358	0.971164	0.619886		0.665555			0.832389			0.765667	0.971164	0.619886		0.78453	0.971164	0.832389	0.619886			0.670819	0.981737		0.78453	0.832389
	0.82189	0.973724	0.620843		0.665847			0.832514			0.786316	0.973724	0.620843		0.787044	0.973724	0.832514	0.620843			0.865118	0.98189		0.787044	0.832514
	0.823143	0.974106	0.621208		0.674648			0.838134			0.787242	0.974106	0.621208		0.813709	0.974106	0.838134	0.621208			0.965048	0.982645		0.813709	0.838134
	0.828833	0.974482	0.621816		0.686263			0.838154			0.790813	0.974482	0.621816		0.82072	0.974482	0.838154	0.621816			1.06425	0.983038		0.82072	0.838154
	0.83328	0.977235	0.622033		0.68898			0.838715			0.792519	0.977235	0.622033		0.829749	0.977235	0.838715	0.622033			1.30758	0.994489		0.829749	0.838715
	0.83399	0.977261	0.622463		0.692975			0.841845			0.801256	0.977261	0.622463		0.832307	0.977261	0.841845	0.622463				1		0.832307	0.841845
	0.842788	0.978896	0.62267		0.701411			0.844569			0.802213	0.978896	0.62267		0.834844	0.978896	0.844569	0.62267				1.00212		0.834844	0.844569
	0.84331	0.979811	0.624076		0.723363			0.846293			0.802485	0.979811	0.624076		0.838266	0.979811	0.846293	0.624076				1.00789		0.838266	0.846293
	0.848074	0.981785	0.625752		0.730588			0.847461			0.804155	0.981785	0.625752		0.8384	0.981785	0.847461	0.625752				1.00927		0.8384	0.847461
	0.850548	0.982041	0.625849		0.732268			0.848236			0.812748	0.982041	0.625849		0.844341	0.982041	0.848236	0.625849				1.01039		0.844341	0.848236
	0.858737	0.984389	0.626199		0.737276			0.848833			0.814958	0.984389	0.626199		0.845849	0.984389	0.848833	0.626199				1.01472		0.845849	0.848833
	0.869588	0.984569	0.631363		0.737423			0.849848			0.817162	0.984569	0.631363		0.85133	0.984569	0.849848	0.631363				1.01586		0.85133	0.849848
	0.882498	0.984678	0.63238		0.737708			0.851834			0.830415	0.984678	0.63238		0.872142	0.984678	0.851834	0.63238				1.02076		0.872142	0.851834
	0.891009	0.986352	0.633543		0.74118			0.854704			0.832179	0.986352	0.633543		0.877695	0.986352	0.854704	0.633543				1.02403		0.877695	0.854704
	0.911429	0.987026	0.634597		0.744064			0.858571			0.853369	0.987026	0.634597		0.893438	0.987026	0.858571	0.634597				1.0255		0.893438	0.858571
	0.922296	0.987583	0.634689		0.748474			0.858625			0.854576	0.987583	0.634689		0.901147	0.987583	0.858625	0.634689				1.03528		0.901147	0.858625
	0.952771	0.987636	0.636516		0.751205			0.860244			0.859537	0.987636	0.636516		0.916768	0.987636	0.860244	0.636516				1.03645		0.916768	0.860244
	0.962777	0.98979	0.63862		0.75425			0.861763			0.875339	0.98979	0.63862		0.917298	0.98979	0.861763	0.63862				1.03701		0.917298	0.861763
	0.990269	0.990051	0.639892		0.756896			0.863625			0.89573	0.990051	0.639892		0.940089	0.990051	0.863625	0.639892				1.03984		0.940089	0.863625
	0.993144	0.992158	0.640138		0.768544			0.865567			0.901161	0.992158	0.640138		0.947228	0.992158	0.865567	0.640138				1.04789		0.947228	0.865567
	0.993144	0.993267	0.641118		0.771244			0.865575			0.90909	0.993267	0.641118		0.949635	0.993267	0.865575	0.641118				1.05581		0.949635	0.865575
	0.99492	0.993433	0.64192		0.776104			0.867331			0.924908	0.993433	0.64192		0.956892	0.993433	0.867331	0.64192				1.05701		0.956892	0.867331
	1.02965	0.993878	0.642592		0.778306			0.868236			0.927598	0.993878	0.642592		0.958475	0.993878	0.868236	0.642592				1.07058		0.958475	0.868236
	1.05162	0.994142	0.644198		0.78026			0.868275			0.931565	0.994142	0.644198		0.961255	0.994142	0.868275	0.644198				1.07354		0.961255	0.868275
	1.0642	0.995789	0.64436		0.789823			0.871051			0.933393	0.995789	0.64436		0.972972	0.995789	0.871051	0.64436				1.0863		0.972972	0.871051
	1.08914	0.998363	0.646576		0.800192			0.871952			0.934805	0.998363	0.646576		0.977169	0.998363	0.871952	0.646576				1.105		0.977169	0.871952
	1.09557	0.998534	0.647981		0.811867			0.872696			0.945541	0.998534	0.647981		0.977948	0.998534	0.872696	0.647981				1.10888		0.977948	0.872696
	1.12339	1.00118	0.648046		0.815605			0.873017			0.948458	1.00118	0.648046		0.997934	1.00118	0.873017	0.648046				1.11474		0.997934	0.873017
	1.19627	1.00336	0.648838		0.816315			0.873335			0.948969	1.00336	0.648838		1.00121	1.00336	0.873335	0.648838				1.11534		1.00121	0.873335
	1.58346	1.00645	0.650491		0.826435			0.874737			0.955149	1.00645	0.650491		1.00544	1.00645	0.874737	0.650491				1.12159		1.00544	0.874737
	0.180296	1.00648	0.650661		0.826972			0.875904			0.975259	1.00648	0.650661		1.01061	1.00648	0.875904	0.650661				1.1267		1.01061	0.875904
	0.255436	1.0073	0.65137		0.832989			0.877254			0.978623	1.0073	0.65137		1.01263	1.0073	0.877254	0.65137				1.13389		1.01263	0.877254
	0.318205	1.00816	0.651612		0.83906			0.878391			0.980192	1.00816	0.651612		1.01971	1.00816	0.878391	0.651612				1.13499		1.01971	0.878391
	0.328028	1.01362	0.65253		0.866409			0.880993			0.993274	1.01362	0.65253		1.02247	1.01362	0.880993	0.65253				1.14305		1.02247	0.880993
	0.396871	1.01539	0.654927		0.867391			0.882867			0.994896	1.01539	0.654927		1.02708	1.01539	0.882867	0.654927				1.14519		1.02708	0.882867
	0.432346	1.01748	0.656543		0.871856			0.884388			0.998413	1.01748	0.656543		1.02914	1.01748	0.884388	0.656543				1.1504		1.02914	0.884388
	0.456714	1.01838	0.657161		0.873068			0.884881			1.00397	1.01838	0.657161		1.02997	1.01838	0.884881	0.657161				1.15536		1.02997	0.884881
	0.469407	1.01879	0.658068		0.879089			0.885105			1.00531	1.01879	0.658068		1.03554	1.01879	0.885105	0.658068				1.16072		1.03554	0.885105
	0.481237	1.02033	0.659283		0.882919			0.891809			1.01125	1.02033	0.659283		1.0466	1.02033	0.891809	0.659283				1.16834		1.0466	0.891809
	0.489301	1.02087	0.660003		0.885488			0.892101			1.03217	1.02087	0.660003		1.04724	1.02087	0.892101	0.660003				1.17225		1.04724	0.892101
	0.489702	1.02176	0.661495		0.887768			0.892119			0.412895	1.02176	0.661495		1.05025	1.02176	0.892119	0.661495				1.18812		1.05025	0.892119
	0.49804	1.02512	0.661763		0.888139			0.89245			0.438356	1.02512	0.661763		1.05713	1.02512	0.89245	0.661763				1.18892		1.05713	0.89245
	0.50214	1.02749	0.662242		0.89297			0.895748			0.439766	1.02749	0.662242		1.06843	1.02749	0.895748	0.662242				1.18904		1.06843	0.895748
	0.507653	1.02985	0.662547		0.894021			0.89789			0.443376	1.02985	0.662547		1.07231	1.02985	0.89789	0.662547				1.19355		1.07231	0.89789
	0.509538	1.03186	0.664424		0.899556			0.89847			0.466002	1.03186	0.664424		1.08201	1.03186	0.89847	0.664424				1.19689		1.08201	0.89847
	0.511243	1.03221	0.665999		0.904294			0.901709			0.480606	1.03221	0.665999		1.10329	1.03221	0.901709	0.665999				1.198		1.10329	0.901709
	0.521578	1.03382	0.668591		0.930782			0.901805			0.48566	1.03382	0.668591		1.18323	1.03382	0.901805	0.668591				1.19803		1.18323	0.901805
	0.524803	1.03567	0.668727		0.939907			0.909447			0.505979	1.03567	0.668727		1.2328	1.03567	0.909447	0.668727				1.19941		1.2328	0.909447
	0.530534	1.03672	0.670614		0.942079			0.910022			0.510084	1.03672	0.670614		1.31221	1.03672	0.910022	0.670614				1.2029		1.31221	0.910022
	0.536727	1.03926	0.675156		0.951138			0.910882			0.538777	1.03926	0.675156		0.491574	1.03926	0.910882	0.675156				1.20798		0.491574	0.910882
	0.542672	1.04183	0.676281		0.952539			0.913569			0.538879	1.04183	0.676281		0.563384	1.04183	0.913569	0.676281				1.21356		0.563384	0.913569
	0.546182	1.04286	0.676957		0.963686			0.914275			0.539873	1.04286	0.676957		0.646989	1.04286	0.914275	0.676957				1.21496		0.646989	0.914275
	0.546949	1.05036	0.679156		0.963827			0.917941			0.572386	1.05036	0.679156		0.64908	1.05036	0.917941	0.679156				1.22335		0.64908	0.917941
	0.547088	1.0525	0.679182		0.97535			0.921252			0.572767	1.0525	0.679182		0.68126	1.0525	0.921252	0.679182				1.23078		0.68126	0.921252
	0.547132	1.0533	0.679715		0.983084			0.923205			0.576261	1.0533	0.679715		0.698381	1.0533	0.923205	0.679715				1.23942		0.698381	0.923205
	0.568778	1.05595	0.680652		0.9832			0.923476			0.587286	1.05595	0.680652		0.709657	1.05595	0.923476	0.680652				1.2447		0.709657	0.923476
	0.568953	1.05988	0.6857		1.01343			0.924964			0.616616	1.05988	0.6857		0.712491	1.05988	0.924964	0.6857				1.2511		0.712491	0.924964
	0.584726	1.0599	0.687136		1.0342			0.925274			0.619988	1.0599	0.687136		0.712621	1.0599	0.925274	0.687136				1.25431		0.712621	0.925274
	0.587833	1.06052	0.687739		1.04492			0.925534			0.622085	1.06052	0.687739		0.715384	1.06052	0.925534	0.687739				1.27594		0.715384	0.925534
	0.58965	1.0644	0.689046		1.06443			0.926889			0.625852	1.0644	0.689046		0.725664	1.0644	0.926889	0.689046				1.29167		0.725664	0.926889
	0.605309	1.0676	0.691925					0.92693			0.630186	1.0676	0.691925		0.739224	1.0676	0.92693	0.691925				1.29966		0.739224	0.92693
	0.608467	1.08143	0.695718					0.928361			0.633938	1.08143	0.695718		0.747426	1.08143	0.928361	0.695718				1.31313		0.747426	0.928361
	0.616691	1.08518	0.696563					0.928491			0.63463	1.08518	0.696563		0.750247	1.08518	0.928491	0.696563				1.31396		0.750247	0.928491
	0.6193	1.08658	0.698256					0.929331			0.642867	1.08658	0.698256		0.750472	1.08658	0.929331	0.698256				1.32298		0.750472	0.929331
	0.627445	1.08882	0.699306					0.931721			0.643022	1.08882	0.699306		0.753279	1.08882	0.931721	0.699306				1.3248		0.753279	0.931721
	0.629747	1.10187	0.699827					0.932523			0.643696	1.10187	0.699827		0.75924	1.10187	0.932523	0.699827				1.32885		0.75924	0.932523
	0.630463	1.10491	0.700512					0.933279			0.657518	1.10491	0.700512		0.760923	1.10491	0.933279	0.700512				1.3319		0.760923	0.933279
	0.630572	1.10652	0.700549					0.933706			0.658013	1.10652	0.700549		0.768727	1.10652	0.933706	0.700549				1.34169		0.768727	0.933706
	0.633596	1.10752	0.703362					0.934981			0.667749	1.10752	0.703362		0.770017	1.10752	0.934981	0.703362				1.34729		0.770017	0.934981
	0.63528	1.10836	0.70374					0.935248			0.671642	1.10836	0.70374		0.778266	1.10836	0.935248	0.70374				1.36334		0.778266	0.935248
	0.637577	1.10887	0.704515					0.937907			0.672437	1.10887	0.704515		0.780495	1.10887	0.937907	0.704515				1.36749		0.780495	0.937907
	0.641012	1.11059	0.705626					0.938259			0.684312	1.11059	0.705626		0.793362	1.11059	0.938259	0.705626				1.37582		0.793362	0.938259
	0.641718	1.11171	0.70612					0.939067			0.691565	1.11171	0.70612		0.793455	1.11171	0.939067	0.70612				1.44649		0.793455	0.939067
	0.643385	1.11308	0.706388					0.939813			0.695572	1.11308	0.706388		0.804471	1.11308	0.939813	0.706388				1.47104		0.804471	0.939813
	0.649298	1.11517	0.707451					0.941632			0.704462	1.11517	0.707451		0.808646	1.11517	0.941632	0.707451				1.49663		0.808646	0.941632
	0.650324	1.11653	0.707938					0.94463			0.708965	1.11653	0.707938		0.815558	1.11653	0.94463	0.707938				1.49798		0.815558	0.94463
	0.654664	1.14707	0.708754					0.947627			0.71867	1.14707	0.708754		0.816835	1.14707	0.947627	0.708754				1.5059		0.816835	0.947627
	0.65853	1.15146	0.709082					0.94769			0.730954	1.15146	0.709082		0.817214	1.15146	0.94769	0.709082				1.50915		0.817214	0.94769
	0.661442	1.17647	0.709602					0.94788			0.733302	1.17647	0.709602		0.818369	1.17647	0.94788	0.709602				1.53234		0.818369	0.94788
	0.662489	1.17699	0.711562					0.950869			0.738602	1.17699	0.711562		0.821834	1.17699	0.950869	0.711562				1.5741		0.821834	0.950869
	0.665477	1.18596	0.713519					0.955057			0.745501	1.18596	0.713519		0.822174	1.18596	0.955057	0.713519				1.97611		0.822174	0.955057
	0.667593	1.18658	0.714283					0.961091			0.753877	1.18658	0.714283		0.822657	1.18658	0.961091	0.714283				0.510332		0.822657	0.961091
	0.66836	1.18681	0.714543					0.963946			0.756382	1.18681	0.714543		0.824399	1.18681	0.963946	0.714543				0.596215		0.824399	0.963946
	0.669908	1.19269	0.714989					0.964543			0.757667	1.19269	0.714989		0.828958	1.19269	0.964543	0.714989				0.615977		0.828958	0.964543
	0.67675	1.20155	0.715867					0.965168			0.760294	1.20155	0.715867		0.834158	1.20155	0.965168	0.715867				0.628579		0.834158	0.965168
	0.680312	1.22373	0.716357					0.966811			0.761161	1.22373	0.716357		0.837154	1.22373	0.966811	0.716357				0.635438		0.837154	0.966811
	0.685	1.22432	0.717106					0.968009			0.772958	1.22432	0.717106		0.837345	1.22432	0.968009	0.717106				0.640207		0.837345	0.968009
	0.685106	1.24356	0.719072					0.969641			0.78324	1.24356	0.719072		0.845708	1.24356	0.969641	0.719072				0.650401		0.845708	0.969641
	0.696271	1.24947	0.719664					0.969961			0.807289	1.24947	0.719664		0.850247	1.24947	0.969961	0.719664				0.666211		0.850247	0.969961
	0.697117	1.25093	0.721885					0.970774			0.811697	1.25093	0.721885		0.854223	1.25093	0.970774	0.721885				0.679625		0.854223	0.970774
	0.701486	1.258	0.721939					0.971323			0.813089	1.258	0.721939		0.857921	1.258	0.971323	0.721939				0.700741		0.857921	0.971323
	0.702322	1.26879	0.723502					0.971929			0.813863	1.26879	0.723502		0.865948	1.26879	0.971929	0.723502				0.702325		0.865948	0.971929
	0.702981	1.26942	0.7244					0.972123			0.81481	1.26942	0.7244		0.869027	1.26942	0.972123	0.7244				0.714922		0.869027	0.972123
	0.706425	1.2726	0.724916					0.974028			0.81919	1.2726	0.724916		0.882655	1.2726	0.974028	0.724916				0.724835		0.882655	0.974028
	0.723593	1.27361	0.731345					0.974153			0.822128	1.27361	0.731345		0.890437	1.27361	0.974153	0.731345				0.764196		0.890437	0.974153
	0.737506	1.29862	0.732374					0.978736			0.824482	1.29862	0.732374		0.890583	1.29862	0.978736	0.732374				0.781363		0.890583	0.978736
	0.741384	1.31333	0.732944					0.981506			0.832648	1.31333	0.732944		0.903412	1.31333	0.981506	0.732944				0.791249		0.903412	0.981506
	0.747632	1.35844	0.733688					0.982245			0.844042	1.35844	0.733688		0.908464	1.35844	0.982245	0.733688				0.792479		0.908464	0.982245
	0.748836	1.3604	0.734204					0.982297			0.849238	1.3604	0.734204		0.913402	1.3604	0.982297	0.734204				0.803305		0.913402	0.982297
	0.752895	1.37388	0.734917					0.982544			0.854841	1.37388	0.734917		0.928302	1.37388	0.982544	0.734917				0.803447		0.928302	0.982544
	0.753412	1.40458	0.737153					0.983541			0.865598	1.40458	0.737153		0.934013	1.40458	0.983541	0.737153				0.804258		0.934013	0.983541
	0.754368	1.42596	0.741584					0.98556			0.907995	1.42596	0.741584		0.935615	1.42596	0.98556	0.741584				0.822114		0.935615	0.98556
	0.767188	1.42913	0.743038					0.987915			0.909089	1.42913	0.743038		0.94526	1.42913	0.987915	0.743038				0.824463		0.94526	0.987915
	0.767264	1.43096	0.743877					0.988523			0.912918	1.43096	0.743877		0.95275	1.43096	0.988523	0.743877				0.826939		0.95275	0.988523
	0.777059	1.49113	0.74441					0.990271			0.914296	1.49113	0.74441		0.953028	1.49113	0.990271	0.74441				0.82846		0.953028	0.990271
	0.778082	1.5514	0.745043					0.992338			0.927353	1.5514	0.745043		0.953832	1.5514	0.992338	0.745043				0.832397		0.953832	0.992338
	0.798061	1.56812	0.745136					0.992686			0.932285	1.56812	0.745136		0.954854	1.56812	0.992686	0.745136				0.833872		0.954854	0.992686
	0.809268	1.60309	0.746314					0.996096			0.943195	1.60309	0.746314		0.961926	1.60309	0.996096	0.746314				0.837047		0.961926	0.996096
	0.817029	1.62896	0.748338					0.996492			0.946332	1.62896	0.748338		0.97194	1.62896	0.996492	0.748338				0.837123		0.97194	0.996492
	0.820311	1.63294	0.749215					1			0.956219	1.63294	0.749215		0.980403	1.63294	1	0.749215				0.858109		0.980403	1
	0.821331	1.87613	0.750006					1			0.95624	1.87613	0.750006		0.984155	1.87613	1	0.750006				0.858121		0.984155	1
	0.825291	1.89135	0.750632					1.00323			0.969424	1.89135	0.750632		1	1.89135	1.00323	0.750632				0.874077		1	1.00323
	0.825735	2.68465	0.751299					1.00725			0.984887	2.68465	0.751299		1.00265	2.68465	1.00725	0.751299				0.874663		1.00265	1.00725
	0.832789		0.751542					1.01181			0.998391		0.751542		1.0112		1.01181	0.751542				0.87604		1.0112	1.01181
	0.844497		0.753722					1.01186			1.0292		0.753722		1.02236		1.01186	0.753722				0.882807		1.02236	1.01186
	0.845752		0.75529					1.0134			1.06446		0.75529		1.03054		1.0134	0.75529				0.88661		1.03054	1.0134
	0.852818		0.755981					1.01402			1.09929		0.755981		1.03181		1.01402	0.755981				0.902179		1.03181	1.01402
	0.853665		0.757352					1.01592					0.757352		1.03191		1.01592	0.757352				0.915039		1.03191	1.01592
	0.871497		0.759175					1.01597					0.759175		1.07369		1.01597	0.759175				0.915643		1.07369	1.01597
	0.885729		0.759421					1.01643					0.759421		1.0743		1.01643	0.759421				0.917862		1.0743	1.01643
	0.898137		0.76007					1.01667					0.76007		1.09644		1.01667	0.76007				0.921686		1.09644	1.01667
	0.901788		0.760942					1.01694					0.760942		1.15044		1.01694	0.760942				0.926955		1.15044	1.01694
	0.903066		0.761929					1.02109					0.761929		1.16111		1.02109	0.761929				0.927258		1.16111	1.02109
	0.909086		0.762913					1.02279					0.762913		1.17775		1.02279	0.762913				0.929884		1.17775	1.02279
	0.913601		0.764951					1.02284					0.764951		1.1862		1.02284	0.764951				0.937191		1.1862	1.02284
	0.923981		0.765427					1.02605					0.765427		1.28373		1.02605	0.765427				0.938963		1.28373	1.02605
	0.929643		0.767988					1.02633					0.767988		1.48644		1.02633	0.767988				0.941593		1.48644	1.02633
	0.932765		0.769784					1.02634					0.769784		1.62856		1.02634	0.769784				0.942624		1.62856	1.02634
	0.938676		0.769801					1.02689					0.769801				1.02689	0.769801				0.942982			1.02689
	0.950762		0.770528					1.0279					0.770528				1.0279	0.770528				0.945792			1.0279
	0.953251		0.775061					1.03101					0.775061				1.03101	0.775061				0.948084			1.03101
	0.954232		0.778836					1.03182					0.778836				1.03182	0.778836				0.95			1.03182
	0.964894		0.778968					1.03473					0.778968				1.03473	0.778968				0.950893			1.03473
	0.988408		0.780552					1.03473					0.780552				1.03473	0.780552				0.952539			1.03473
	1.00463		0.781685					1.03589					0.781685				1.03589	0.781685				0.954334			1.03589
	1.05315		0.781922					1.03593					0.781922				1.03593	0.781922				0.956867			1.03593
	1.07279		0.782754					1.03734					0.782754				1.03734	0.782754				0.958713			1.03734
	1.37532		0.783056					1.04018					0.783056				1.04018	0.783056				0.961311			1.04018
			0.784546					1.04128					0.784546				1.04128	0.784546				0.967962			1.04128
			0.786213					1.04152					0.786213				1.04152	0.786213				0.968528			1.04152
			0.786387					1.04268					0.786387				1.04268	0.786387				0.973543			1.04268
			0.7869					1.04549					0.7869				1.04549	0.7869				0.978407			1.04549
			0.786967					1.04902					0.786967				1.04902	0.786967				0.980453			1.04902
			0.787342					1.04999					0.787342				1.04999	0.787342				0.990587			1.04999
			0.78978					1.05057					0.78978				1.05057	0.78978				1.00118			1.05057
			0.79142					1.05264					0.79142				1.05264	0.79142				1.00957			1.05264
			0.792668					1.05421					0.792668				1.05421	0.792668				1.00978			1.05421
			0.793076					1.05611					0.793076				1.05611	0.793076				1.0104			1.05611
			0.796113					1.05692					0.796113				1.05692	0.796113				1.0115			1.05692
			0.79648					1.05846					0.79648				1.05846	0.79648				1.01266			1.05846
			0.798505					1.05856					0.798505				1.05856	0.798505				1.02053			1.05856
			0.798564					1.06088					0.798564				1.06088	0.798564				1.02203			1.06088
			0.800321					1.06165					0.800321				1.06165	0.800321				1.02821			1.06165
			0.800845					1.06208					0.800845				1.06208	0.800845				1.03183			1.06208
			0.801951					1.06277					0.801951				1.06277	0.801951				1.03272			1.06277
			0.803008					1.06674					0.803008				1.06674	0.803008				1.03543			1.06674
			0.804832					1.06933					0.804832				1.06933	0.804832				1.03691			1.06933
			0.809533					1.07611					0.809533				1.07611	0.809533				1.04182			1.07611
			0.809793					1.07713					0.809793				1.07713	0.809793				1.04821			1.07713
			0.812654					1.07834					0.812654				1.07834	0.812654				1.05162			1.07834
			0.816085					1.08007					0.816085				1.08007	0.816085				1.05507			1.08007
			0.818692					1.08032					0.818692				1.08032	0.818692				1.05956			1.08032
			0.818962					1.08254					0.818962				1.08254	0.818962				1.06085			1.08254
			0.820065					1.08612					0.820065				1.08612	0.820065				1.08483			1.08612
			0.820157					1.08616					0.820157				1.08616	0.820157				1.08581			1.08616
			0.821311					1.08646					0.821311				1.08646	0.821311				1.08619			1.08646
			0.821424					1.08705					0.821424				1.08705	0.821424				1.08929			1.08705
			0.821819					1.09043					0.821819				1.09043	0.821819				1.09755			1.09043
			0.822221					1.09499					0.822221				1.09499	0.822221				1.11193			1.09499
			0.826147					1.0971					0.826147				1.0971	0.826147				1.12531			1.0971
			0.826379					1.09769					0.826379				1.09769	0.826379				1.12857			1.09769
			0.828395					1.09773					0.828395				1.09773	0.828395				1.13028			1.09773
			0.833342					1.09945					0.833342				1.09945	0.833342				1.14676			1.09945
			0.833844					1.10153					0.833844				1.10153	0.833844				1.15093			1.10153
			0.834564					1.10365					0.834564				1.10365	0.834564				1.16241			1.10365
			0.839586					1.10427					0.839586				1.10427	0.839586				1.16284			1.10427
			0.84645					1.10439					0.84645				1.10439	0.84645				1.16406			1.10439
			0.846726					1.10632					0.846726				1.10632	0.846726				1.17323			1.10632
			0.848609					1.10774					0.848609				1.10774	0.848609				1.17832			1.10774
			0.852757					1.10781					0.852757				1.10781	0.852757				1.20029			1.10781
			0.854036					1.1079					0.854036				1.1079	0.854036				1.20349			1.1079
			0.857696					1.10827					0.857696				1.10827	0.857696				1.20822			1.10827
			0.859219					1.10991					0.859219				1.10991	0.859219				1.21092			1.10991
			0.861543					1.11112					0.861543				1.11112	0.861543				1.21215			1.11112
			0.863083					1.12049					0.863083				1.12049	0.863083				1.22442			1.12049
			0.863978					1.12073					0.863978				1.12073	0.863978				1.22609			1.12073
			0.872646					1.12447					0.872646				1.12447	0.872646				1.24307			1.12447
			0.875952					1.12546					0.875952				1.12546	0.875952				1.24912			1.12546
			0.878158					1.12704					0.878158				1.12704	0.878158				1.24916			1.12704
			0.890083					1.12873					0.890083				1.12873	0.890083				1.24991			1.12873
			0.891573					1.12874					0.891573				1.12874	0.891573				1.26329			1.12874
			0.89447					1.12895					0.89447				1.12895	0.89447				1.26624			1.12895
			0.905502					1.13213					0.905502				1.13213	0.905502				1.26726			1.13213
			0.906399					1.13258					0.906399				1.13258	0.906399				1.27219			1.13258
			0.907317					1.13689					0.907317				1.13689	0.907317				1.27415			1.13689
			0.907498					1.1434					0.907498				1.1434	0.907498				1.27607			1.1434
			0.915202					1.14519					0.915202				1.14519	0.915202				1.2927			1.14519
			0.920133					1.14907					0.920133				1.14907	0.920133				1.30485			1.14907
			0.922957					1.15315					0.922957				1.15315	0.922957				1.34972			1.15315
			0.92512					1.15625					0.92512				1.15625	0.92512				1.35046			1.15625
			0.925179					1.16977					0.925179				1.16977	0.925179				1.3554			1.16977
			0.927181					1.17067					0.927181				1.17067	0.927181				1.37628			1.17067
			0.927499					1.17113					0.927499				1.17113	0.927499				1.38169			1.17113
			0.928646					1.17433					0.928646				1.17433	0.928646				1.39353			1.17433
			0.930892					1.17638					0.930892				1.17638	0.930892				1.40659			1.17638
			0.935966					1.17655					0.935966				1.17655	0.935966				1.41383			1.17655
			0.939752					1.18091					0.939752				1.18091	0.939752				1.44032			1.18091
			0.948675					1.18603					0.948675				1.18603	0.948675				1.45872			1.18603
			0.952368					1.18864					0.952368				1.18864	0.952368				1.47362			1.18864
			0.953514					1.20821					0.953514				1.20821	0.953514				1.50724			1.20821
			0.956887					1.2089					0.956887				1.2089	0.956887				1.50909			1.2089
			0.961109					1.21465					0.961109				1.21465	0.961109				1.5225			1.21465
			0.967347					1.2176					0.967347				1.2176	0.967347				1.57147			1.2176
			0.9736					1.21957					0.9736				1.21957	0.9736				1.67814			1.21957
			0.975457					1.22007					0.975457				1.22007	0.975457				1.86145			1.22007
			0.991377					1.22116					0.991377				1.22116	0.991377							1.22116
			0.992016					1.22198					0.992016				1.22198	0.992016							1.22198
			1					1.2291					1				1.2291	1							1.2291
			1.00536					1.23352					1.00536				1.23352	1.00536							1.23352
			1.00946					1.23507					1.00946				1.23507	1.00946							1.23507
			1.01589					1.23566					1.01589				1.23566	1.01589							1.23566
			1.01802					1.23929					1.01802				1.23929	1.01802							1.23929
			1.02203					1.24474					1.02203				1.24474	1.02203							1.24474
			1.02449					1.25036					1.02449				1.25036	1.02449							1.25036
			1.0398					1.2566					1.0398				1.2566	1.0398							1.2566
			1.11811					1.25736					1.11811				1.25736	1.11811							1.25736
			1.17461					1.26215					1.17461				1.26215	1.17461							1.26215
			1.39003					1.26282					1.39003				1.26282	1.39003							1.26282
			0.415872					1.26317					0.415872				1.26317	0.415872							1.26317
			0.490061					1.26634					0.490061				1.26634	0.490061							1.26634
			0.510308					1.28017					0.510308				1.28017	0.510308							1.28017
			0.518039					1.28026					0.518039				1.28026	0.518039							1.28026
			0.520745					1.28201					0.520745				1.28201	0.520745							1.28201
			0.533734					1.28248					0.533734				1.28248	0.533734							1.28248
			0.534215					1.2837					0.534215				1.2837	0.534215							1.2837
			0.548243					1.28635					0.548243				1.28635	0.548243							1.28635
			0.559434					1.28715					0.559434				1.28715	0.559434							1.28715
			0.560779					1.29502					0.560779				1.29502	0.560779							1.29502
			0.564678					1.2962					0.564678				1.2962	0.564678							1.2962
			0.570403					1.30161					0.570403				1.30161	0.570403							1.30161
			0.585115					1.30641					0.585115				1.30641	0.585115							1.30641
			0.592391					1.30754					0.592391				1.30754	0.592391							1.30754
			0.596696					1.32541					0.596696				1.32541	0.596696							1.32541
			0.597961					1.32813					0.597961				1.32813	0.597961							1.32813
			0.600677					1.33356					0.600677				1.33356	0.600677							1.33356
			0.601864					1.33618					0.601864				1.33618	0.601864							1.33618
			0.607434					1.33641					0.607434				1.33641	0.607434							1.33641
			0.608906					1.33887					0.608906				1.33887	0.608906							1.33887
			0.612695					1.35689					0.612695				1.35689	0.612695							1.35689
			0.616134					1.36311					0.616134				1.36311	0.616134							1.36311
			0.620324					1.36943					0.620324				1.36943	0.620324							1.36943
			0.621724					1.37622					0.621724				1.37622	0.621724							1.37622
			0.626176					1.37816					0.626176				1.37816	0.626176							1.37816
			0.62662					1.3786					0.62662				1.3786	0.62662							1.3786
			0.627332					1.38005					0.627332				1.38005	0.627332							1.38005
			0.629964					1.38455					0.629964				1.38455	0.629964							1.38455
			0.640044					1.43378					0.640044				1.43378	0.640044							1.43378
			0.655484					1.45202					0.655484				1.45202	0.655484							1.45202
			0.658589					1.46181					0.658589				1.46181	0.658589							1.46181
			0.660398					1.47376					0.660398				1.47376	0.660398							1.47376
			0.661831					1.47625					0.661831				1.47625	0.661831							1.47625
			0.663401					1.54202					0.663401				1.54202	0.663401							1.54202
			0.673757					1.54905					0.673757				1.54905	0.673757							1.54905
			0.67393					1.5841					0.67393				1.5841	0.67393							1.5841
			0.676392					1.70882					0.676392				1.70882	0.676392							1.70882
			0.677268					1.71958					0.677268				1.71958	0.677268							1.71958
			0.682033					1.74142					0.682033				1.74142	0.682033							1.74142
			0.690686					1.77579					0.690686				1.77579	0.690686							1.77579
			0.695039					1.80542					0.695039				1.80542	0.695039							1.80542
			0.705091					0.760525					0.705091				0.760525	0.705091							0.760525
			0.707007					0.854699					0.707007				0.854699	0.707007							0.854699
			0.709718					0.878361					0.709718				0.878361	0.709718							0.878361
			0.734652					0.906642					0.734652				0.906642	0.734652							0.906642
			0.757412					0.907459					0.757412				0.907459	0.757412							0.907459
			0.778914					0.929259					0.778914				0.929259	0.778914							0.929259
			0.782491					0.941749					0.782491				0.941749	0.782491							0.941749
			0.782753					0.967145					0.782753				0.967145	0.782753							0.967145
			0.784786					0.971567					0.784786				0.971567	0.784786							0.971567
			0.795235					0.98026					0.795235				0.98026	0.795235							0.98026
			0.816156					1.00712					0.816156				1.00712	0.816156							1.00712
			0.818894					1.0075					0.818894				1.0075	0.818894							1.0075
			0.822934					1.0091					0.822934				1.0091	0.822934							1.0091
			0.827604					1.03381					0.827604				1.03381	0.827604							1.03381
			0.833061					1.04588					0.833061				1.04588	0.833061							1.04588
			0.833526					1.05026					0.833526				1.05026	0.833526							1.05026
			0.837873					1.05083					0.837873				1.05083	0.837873							1.05083
			0.847284					1.06164					0.847284				1.06164	0.847284							1.06164
			0.850718					1.06282					0.850718				1.06282	0.850718							1.06282
			0.851685					1.07351					0.851685				1.07351	0.851685							1.07351
			0.867887					1.08903					0.867887				1.08903	0.867887							1.08903
			0.868705					1.09872					0.868705				1.09872	0.868705							1.09872
			0.874878					1.09984					0.874878				1.09984	0.874878							1.09984
			0.879578					1.10043					0.879578				1.10043	0.879578							1.10043
			0.879712					1.11728					0.879712				1.11728	0.879712							1.11728
			0.881667					1.12334					0.881667				1.12334	0.881667							1.12334
			0.882057					1.1333					0.882057				1.1333	0.882057							1.1333
			0.882135					1.1422					0.882135				1.1422	0.882135							1.1422
			0.885647					1.14761					0.885647				1.14761	0.885647							1.14761
			0.892006					1.16143					0.892006				1.16143	0.892006							1.16143
			0.916212					1.17289					0.916212				1.17289	0.916212							1.17289
			0.922969					1.18636					0.922969				1.18636	0.922969							1.18636
			0.932592					1.18764					0.932592				1.18764	0.932592							1.18764
			0.935321					1.18796					0.935321				1.18796	0.935321							1.18796
			0.945235					1.1953					0.945235				1.1953	0.945235							1.1953
			0.959693					1.20395					0.959693				1.20395	0.959693							1.20395
			0.975547					1.21479					0.975547				1.21479	0.975547							1.21479
			0.997319					1.22345					0.997319				1.22345	0.997319							1.22345
			1.01809					1.22628					1.01809				1.22628	1.01809							1.22628
			1.04253					1.23326					1.04253				1.23326	1.04253							1.23326
			1.06988					1.26502					1.06988				1.26502	1.06988							1.26502
			0.403929					1.27298					0.403929				1.27298	0.403929							1.27298
			0.476075					1.27631					0.476075				1.27631	0.476075							1.27631
			0.479175					1.28055					0.479175				1.28055	0.479175							1.28055
			0.503791					1.3002					0.503791				1.3002	0.503791							1.3002
			0.511766					1.32557					0.511766				1.32557	0.511766							1.32557
			0.525661					1.33047					0.525661				1.33047	0.525661							1.33047
			0.53913					1.40977					0.53913				1.40977	0.53913							1.40977
			0.540902					1.41993					0.540902				1.41993	0.540902							1.41993
			0.546129					1.42737					0.546129				1.42737	0.546129							1.42737
			0.547309					1.45638					0.547309				1.45638	0.547309							1.45638
			0.550535					1.4661					0.550535				1.4661	0.550535							1.4661
			0.558732					1.50082					0.558732				1.50082	0.558732							1.50082
			0.564009					1.57178					0.564009				1.57178	0.564009							1.57178
			0.567709					1.57446					0.567709				1.57446	0.567709							1.57446
			0.572546					1.7336					0.572546				1.7336	0.572546							1.7336
			0.579222					0.648883					0.579222				0.648883	0.579222							0.648883
			0.589261					0.718797					0.589261				0.718797	0.589261							0.718797
			0.595473					0.733869					0.595473				0.733869	0.595473							0.733869
			0.597301					0.775315					0.597301				0.775315	0.597301							0.775315
			0.601804					0.805932					0.601804				0.805932	0.601804							0.805932
			0.618749					0.807407					0.618749				0.807407	0.618749							0.807407
			0.621107					0.808817					0.621107				0.808817	0.621107							0.808817
			0.621388					0.809913					0.621388				0.809913	0.621388							0.809913
			0.621692					0.816896					0.621692				0.816896	0.621692							0.816896
			0.622052					0.818264					0.622052				0.818264	0.622052							0.818264
			0.622622					0.826994					0.622622				0.826994	0.622622							0.826994
			0.6253					0.830127					0.6253				0.830127	0.6253							0.830127
			0.62665					0.832765					0.62665				0.832765	0.62665							0.832765
			0.644513					0.851857					0.644513				0.851857	0.644513							0.851857
			0.649479					0.854937					0.649479				0.854937	0.649479							0.854937
			0.657305					0.872122					0.657305				0.872122	0.657305							0.872122
			0.663481					0.877131					0.663481				0.877131	0.663481							0.877131
			0.66378					0.877342					0.66378				0.877342	0.66378							0.877342
			0.66456					0.880429					0.66456				0.880429	0.66456							0.880429
			0.664932					0.884206					0.664932				0.884206	0.664932							0.884206
			0.667361					0.889887					0.667361				0.889887	0.667361							0.889887
			0.668668					0.898168					0.668668				0.898168	0.668668							0.898168
			0.669131					0.906538					0.669131				0.906538	0.669131							0.906538
			0.677493					0.920644					0.677493				0.920644	0.677493							0.920644
			0.684129					0.931105					0.684129				0.931105	0.684129							0.931105
			0.685083					0.948685					0.685083				0.948685	0.685083							0.948685
			0.688774					0.950762					0.688774				0.950762	0.688774							0.950762
			0.692016					0.950898					0.692016				0.950898	0.692016							0.950898
			0.693119					0.951558					0.693119				0.951558	0.693119							0.951558
			0.698954					0.954546					0.698954				0.954546	0.698954							0.954546
			0.699512					0.955714					0.699512				0.955714	0.699512							0.955714
			0.703152					0.957					0.703152				0.957	0.703152							0.957
			0.724014					0.97252					0.724014				0.97252	0.724014							0.97252
			0.725815					0.973413					0.725815				0.973413	0.725815							0.973413
			0.726084					0.982181					0.726084				0.982181	0.726084							0.982181
			0.730192					0.987209					0.730192				0.987209	0.730192							0.987209
			0.736121					0.994558					0.736121				0.994558	0.736121							0.994558
			0.73904					1					0.73904				1	0.73904							1
			0.752299					1					0.752299				1	0.752299							1
			0.759557					1.00243					0.759557				1.00243	0.759557							1.00243
			0.760628					1.00665					0.760628				1.00665	0.760628							1.00665
			0.765029					1.01931					0.765029				1.01931	0.765029							1.01931
			0.765839					1.02134					0.765839				1.02134	0.765839							1.02134
			0.789179					1.02275					0.789179				1.02275	0.789179							1.02275
			0.835826					1.02766					0.835826				1.02766	0.835826							1.02766
			0.836747					1.03513					0.836747				1.03513	0.836747							1.03513
			0.876719					1.04062					0.876719				1.04062	0.876719							1.04062
			0.886036					1.0421					0.886036				1.0421	0.886036							1.0421
			0.904704					1.04308					0.904704				1.04308	0.904704							1.04308
			0.949868					1.04569					0.949868				1.04569	0.949868							1.04569
			1.04374					1.052					1.04374				1.052	1.04374							1.052
			1.05883					1.05219					1.05883				1.05219	1.05883							1.05219
			0.415872					1.0596					0.415872				1.0596	0.415872							1.0596
			0.490061					1.07411					0.490061				1.07411	0.490061							1.07411
			0.510308					1.07444					0.510308				1.07444	0.510308							1.07444
			0.518039					1.0753					0.518039				1.0753	0.518039							1.0753
			0.520745					1.09142					0.520745				1.09142	0.520745							1.09142
			0.533734					1.09264					0.533734				1.09264	0.533734							1.09264
			0.534215					1.09316					0.534215				1.09316	0.534215							1.09316
			0.548243					1.10951					0.548243				1.10951	0.548243							1.10951
			0.559434					1.11132					0.559434				1.11132	0.559434							1.11132
			0.560779					1.11413					0.560779				1.11413	0.560779							1.11413
			0.564678					1.1146					0.564678				1.1146	0.564678							1.1146
			0.570403					1.12163					0.570403				1.12163	0.570403							1.12163
			0.585115					1.12234					0.585115				1.12234	0.585115							1.12234
			0.592391					1.12836					0.592391				1.12836	0.592391							1.12836
			0.596696					1.13343					0.596696				1.13343	0.596696							1.13343
			0.597961					1.14297					0.597961				1.14297	0.597961							1.14297
			0.600677					1.15585					0.600677				1.15585	0.600677							1.15585
			0.601864					1.15707					0.601864				1.15707	0.601864							1.15707
			0.607434					1.16978					0.607434				1.16978	0.607434							1.16978
			0.608906					1.1774					0.608906				1.1774	0.608906							1.1774
			0.612695					1.17912					0.612695				1.17912	0.612695							1.17912
			0.616134					1.19024					0.616134				1.19024	0.616134							1.19024
			0.620324					1.21059					0.620324				1.21059	0.620324							1.21059
			0.621724					1.21606					0.621724				1.21606	0.621724							1.21606
			0.626176					1.2381					0.626176				1.2381	0.626176							1.2381
			0.62662					1.24206					0.62662				1.24206	0.62662							1.24206
			0.627332					1.25501					0.627332				1.25501	0.627332							1.25501
			0.629964					1.26325					0.629964				1.26325	0.629964							1.26325
			0.640044					1.28307					0.640044				1.28307	0.640044							1.28307
			0.655484					1.28491					0.655484				1.28491	0.655484							1.28491
			0.658589					1.28548					0.658589				1.28548	0.658589							1.28548
			0.660398					1.31795					0.660398				1.31795	0.660398							1.31795
			0.661831					1.33219					0.661831				1.33219	0.661831							1.33219
			0.663401					1.37347					0.663401				1.37347	0.663401							1.37347
			0.673757					1.41822					0.673757				1.41822	0.673757							1.41822
			0.67393					1.43644					0.67393				1.43644	0.67393							1.43644
			0.676392					1.49026					0.676392				1.49026	0.676392							1.49026
			0.677268					1.49949					0.677268				1.49949	0.677268							1.49949
			0.682033					1.50812					0.682033				1.50812	0.682033							1.50812
			0.690686					1.63241					0.690686				1.63241	0.690686							1.63241
			0.695039					0.760525					0.695039				0.760525	0.695039							0.760525
			0.705091					0.854699					0.705091				0.854699	0.705091							0.854699
			0.707007					0.878361					0.707007				0.878361	0.707007							0.878361
			0.709718					0.906642					0.709718				0.906642	0.709718							0.906642
			0.734652					0.907459					0.734652				0.907459	0.734652							0.907459
			0.757412					0.929259					0.757412				0.929259	0.757412							0.929259
			0.778914					0.941749					0.778914				0.941749	0.778914							0.941749
			0.782491					0.967145					0.782491				0.967145	0.782491							0.967145
			0.782753					0.971567					0.782753				0.971567	0.782753							0.971567
			0.784786					0.98026					0.784786				0.98026	0.784786							0.98026
			0.795235					1.00712					0.795235				1.00712	0.795235							1.00712
			0.816156					1.0075					0.816156				1.0075	0.816156							1.0075
			0.818894					1.0091					0.818894				1.0091	0.818894							1.0091
			0.822934					1.03381					0.822934				1.03381	0.822934							1.03381
			0.827604					1.04588					0.827604				1.04588	0.827604							1.04588
			0.833061					1.05026					0.833061				1.05026	0.833061							1.05026
			0.833526					1.05083					0.833526				1.05083	0.833526							1.05083
			0.837873					1.06164					0.837873				1.06164	0.837873							1.06164
			0.847284					1.06282					0.847284				1.06282	0.847284							1.06282
			0.850718					1.07351					0.850718				1.07351	0.850718							1.07351
			0.851685					1.08903					0.851685				1.08903	0.851685							1.08903
			0.867887					1.09872					0.867887				1.09872	0.867887							1.09872
			0.868705					1.09984					0.868705				1.09984	0.868705							1.09984
			0.874878					1.10043					0.874878				1.10043	0.874878							1.10043
			0.879578					1.11728					0.879578				1.11728	0.879578							1.11728
			0.879712					1.12334					0.879712				1.12334	0.879712							1.12334
			0.881667					1.1333					0.881667				1.1333	0.881667							1.1333
			0.882057					1.1422					0.882057				1.1422	0.882057							1.1422
			0.882135					1.14761					0.882135				1.14761	0.882135							1.14761
			0.885647					1.16143					0.885647				1.16143	0.885647							1.16143
			0.892006					1.17289					0.892006				1.17289	0.892006							1.17289
			0.916212					1.18636					0.916212				1.18636	0.916212							1.18636
			0.922969					1.18764					0.922969				1.18764	0.922969							1.18764
			0.932592					1.18796					0.932592				1.18796	0.932592							1.18796
			0.935321					1.1953					0.935321				1.1953	0.935321							1.1953
			0.945235					1.20395					0.945235				1.20395	0.945235							1.20395
			0.959693					1.21479					0.959693				1.21479	0.959693							1.21479
			0.975547					1.22345					0.975547				1.22345	0.975547							1.22345
			0.997319					1.22628					0.997319				1.22628	0.997319							1.22628
			1.01809					1.23326					1.01809				1.23326	1.01809							1.23326
			1.04253					1.26502					1.04253				1.26502	1.04253							1.26502
			1.06988					1.27298					1.06988				1.27298	1.06988							1.27298
			0.195937					1.27631					0.195937				1.27631	0.195937							1.27631
			0.245043					1.28055					0.245043				1.28055	0.245043							1.28055
			0.252217					1.3002					0.252217				1.3002	0.252217							1.3002
			0.26426					1.32557					0.26426				1.32557	0.26426							1.32557
			0.266525					1.33047					0.266525				1.33047	0.266525							1.33047
			0.279798					1.40977					0.279798				1.40977	0.279798							1.40977
			0.313876					1.41993					0.313876				1.41993	0.313876							1.41993
			0.318989					1.42737					0.318989				1.42737	0.318989							1.42737
			0.331605					1.45638					0.331605				1.45638	0.331605							1.45638
			0.350578					1.4661					0.350578				1.4661	0.350578							1.4661
			0.35925					1.50082					0.35925				1.50082	0.35925							1.50082
			0.364363					1.57178					0.364363				1.57178	0.364363							1.57178
			0.376844					1.57446					0.376844				1.57446	0.376844							1.57446
			0.404467					1.7336					0.404467				1.7336	0.404467							1.7336
			0.408393					0.501966					0.408393				0.501966	0.408393							0.501966
			0.41115					0.568071					0.41115				0.568071	0.41115							0.568071
			0.414559					0.578768					0.414559				0.578768	0.414559							0.578768
			0.434921					0.582336					0.434921				0.582336	0.434921							0.582336
			0.435943					0.639794					0.435943				0.639794	0.435943							0.639794
			0.450326					0.690466					0.450326				0.690466	0.450326							0.690466
			0.451545					0.690658					0.451545				0.690658	0.451545							0.690658
			0.455464					0.748891					0.455464				0.748891	0.455464							0.748891
			0.45586					0.761095					0.45586				0.761095	0.45586							0.761095
			0.457537					0.762112					0.457537				0.762112	0.457537							0.762112
			0.471977					0.763156					0.471977				0.763156	0.471977							0.763156
			0.472071					0.764786					0.472071				0.764786	0.472071							0.764786
			0.472309					0.766139					0.472309				0.766139	0.472309							0.766139
			0.475996					0.768222					0.475996				0.768222	0.475996							0.768222
			0.476015					0.769571					0.476015				0.769571	0.476015							0.769571
			0.477618					0.786456					0.477618				0.786456	0.477618							0.786456
			0.484181					0.787742					0.484181				0.787742	0.484181							0.787742
			0.485249					0.787881					0.485249				0.787881	0.485249							0.787881
			0.490659					0.797252					0.490659				0.797252	0.490659							0.797252
			0.492224					0.801573					0.492224				0.801573	0.492224							0.801573
			0.49304					0.822084					0.49304				0.822084	0.49304							0.822084
			0.495614					0.822545					0.495614				0.822545	0.495614							0.822545
			0.496584					0.835396					0.496584				0.835396	0.496584							0.835396
			0.5					0.84095					0.5				0.84095	0.5							0.84095
			0.500877					0.841961					0.500877				0.841961	0.500877							0.841961
			0.50472					0.844861					0.50472				0.844861	0.50472							0.844861
			0.505171					0.844885					0.505171				0.844885	0.505171							0.844885
			0.506167					0.8473					0.506167				0.8473	0.506167							0.8473
			0.506498					0.850777					0.506498				0.850777	0.506498							0.850777
			0.509022					0.860139					0.509022				0.860139	0.509022							0.860139
			0.509824					0.861689					0.509824				0.861689	0.509824							0.861689
			0.511263					0.872401					0.511263				0.872401	0.511263							0.872401
			0.515381					0.873057					0.515381				0.873057	0.515381							0.873057
			0.515917					0.876552					0.515917				0.876552	0.515917							0.876552
			0.517182					0.877825					0.517182				0.877825	0.517182							0.877825
			0.518062					0.878061					0.518062				0.878061	0.518062							0.878061
			0.518826					0.884012					0.518826				0.884012	0.518826							0.884012
			0.520311					0.884199					0.520311				0.884199	0.520311							0.884199
			0.520393					0.885526					0.520393				0.885526	0.520393							0.885526
			0.521291					0.886117					0.521291				0.886117	0.521291							0.886117
			0.524122					0.8881					0.524122				0.8881	0.524122							0.8881
			0.524197					0.897952					0.524197				0.897952	0.524197							0.897952
			0.52896					0.899279					0.52896				0.899279	0.52896							0.899279
			0.529725					0.903103					0.529725				0.903103	0.529725							0.903103
			0.533897					0.906542					0.533897				0.906542	0.533897							0.906542
			0.535627					0.906984					0.535627				0.906984	0.535627							0.906984
			0.54107					0.907759					0.54107				0.907759	0.54107							0.907759
			0.542759					0.909725					0.542759				0.909725	0.542759							0.909725
			0.543336					0.910257					0.543336				0.910257	0.543336							0.910257
			0.545887					0.911173					0.545887				0.911173	0.545887							0.911173
			0.546429					0.912317					0.546429				0.912317	0.546429							0.912317
			0.547398					0.913866					0.547398				0.913866	0.547398							0.913866
			0.54782					0.914832					0.54782				0.914832	0.54782							0.914832
			0.547894					0.917555					0.547894				0.917555	0.547894							0.917555
			0.549527					0.917646					0.549527				0.917646	0.549527							0.917646
			0.55085					0.918392					0.55085				0.918392	0.55085							0.918392
			0.551207					0.919999					0.551207				0.919999	0.551207							0.919999
			0.55194					0.923618					0.55194				0.923618	0.55194							0.923618
			0.557961					0.924327					0.557961				0.924327	0.557961							0.924327
			0.558356					0.924366					0.558356				0.924366	0.558356							0.924366
			0.559027					0.924652					0.559027				0.924652	0.559027							0.924652
			0.559561					0.924884					0.559561				0.924884	0.559561							0.924884
			0.561284					0.9258					0.561284				0.9258	0.561284							0.9258
			0.56479					0.928689					0.56479				0.928689	0.56479							0.928689
			0.566501					0.928925					0.566501				0.928925	0.566501							0.928925
			0.567006					0.929945					0.567006				0.929945	0.567006							0.929945
			0.567333					0.933207					0.567333				0.933207	0.567333							0.933207
			0.567617					0.933799					0.567617				0.933799	0.567617							0.933799
			0.569328					0.934239					0.569328				0.934239	0.569328							0.934239
			0.57872					0.934732					0.57872				0.934732	0.57872							0.934732
			0.581841					0.941588					0.581841				0.941588	0.581841							0.941588
			0.583532					0.944283					0.583532				0.944283	0.583532							0.944283
			0.583925					0.944389					0.583925				0.944389	0.583925							0.944389
			0.584497					0.944423					0.584497				0.944423	0.584497							0.944423
			0.585395					0.94815					0.585395				0.94815	0.585395							0.94815
			0.58642					0.949522					0.58642				0.949522	0.58642							0.949522
			0.588525					0.950956					0.588525				0.950956	0.588525							0.950956
			0.588875					0.951477					0.588875				0.951477	0.588875							0.951477
			0.589492					0.953326					0.589492				0.953326	0.589492							0.953326
			0.589812					0.953412					0.589812				0.953412	0.589812							0.953412
			0.594929					0.954343					0.594929				0.954343	0.594929							0.954343
			0.595227					0.955517					0.595227				0.955517	0.595227							0.955517
			0.59644					0.956673					0.59644				0.956673	0.59644							0.956673
			0.598301					0.957544					0.598301				0.957544	0.598301							0.957544
			0.598804					0.957547					0.598804				0.957547	0.598804							0.957547
			0.599724					0.958815					0.599724				0.958815	0.599724							0.958815
			0.602979					0.959316					0.602979				0.959316	0.602979							0.959316
			0.604046					0.960415					0.604046				0.960415	0.604046							0.960415
			0.607572					0.960854					0.607572				0.960854	0.607572							0.960854
			0.608615					0.961991					0.608615				0.961991	0.608615							0.961991
			0.609638					0.962154					0.609638				0.962154	0.609638							0.962154
			0.611831					0.96291					0.611831				0.96291	0.611831							0.96291
			0.612745					0.963429					0.612745				0.963429	0.612745							0.963429
			0.614305					0.964738					0.614305				0.964738	0.614305							0.964738
			0.614476					0.969271					0.614476				0.969271	0.614476							0.969271
			0.614973					0.970838					0.614973				0.970838	0.614973							0.970838
			0.615389					0.973451					0.615389				0.973451	0.615389							0.973451
			0.615918					0.973881					0.615918				0.973881	0.615918							0.973881
			0.617104					0.974273					0.617104				0.974273	0.617104							0.974273
			0.6202					0.974704					0.6202				0.974704	0.6202							0.974704
			0.620563					0.975733					0.620563				0.975733	0.620563							0.975733
			0.621654					0.97599					0.621654				0.97599	0.621654							0.97599
			0.624121					0.977145					0.624121				0.977145	0.624121							0.977145
			0.624149					0.977265					0.624149				0.977265	0.624149							0.977265
			0.62574					0.979997					0.62574				0.979997	0.62574							0.979997
			0.627076					0.980029					0.627076				0.980029	0.627076							0.980029
			0.627907					0.980334					0.627907				0.980334	0.627907							0.980334
			0.628527					0.980334					0.628527				0.980334	0.628527							0.980334
			0.629788					0.980723					0.629788				0.980723	0.629788							0.980723
			0.631971					0.980995					0.631971				0.980995	0.631971							0.980995
			0.631977					0.98126					0.631977				0.98126	0.631977							0.98126
			0.632741					0.981971					0.632741				0.981971	0.632741							0.981971
			0.638987					0.983483					0.638987				0.983483	0.638987							0.983483
			0.639153					0.98425					0.639153				0.98425	0.639153							0.98425
			0.639887					0.985801					0.639887				0.985801	0.639887							0.985801
			0.640533					0.986537					0.640533				0.986537	0.640533							0.986537
			0.6407					0.986609					0.6407				0.986609	0.6407							0.986609
			0.64075					0.986708					0.64075				0.986708	0.64075							0.986708
			0.641074					0.987008					0.641074				0.987008	0.641074							0.987008
			0.641628					0.988457					0.641628				0.988457	0.641628							0.988457
			0.64195					0.988602					0.64195				0.988602	0.64195							0.988602
			0.642863					0.989124					0.642863				0.989124	0.642863							0.989124
			0.642947					0.989982					0.642947				0.989982	0.642947							0.989982
			0.645072					0.990381					0.645072				0.990381	0.645072							0.990381
			0.646546					0.990446					0.646546				0.990446	0.646546							0.990446
			0.647419					0.991808					0.647419				0.991808	0.647419							0.991808
			0.647756					0.991885					0.647756				0.991885	0.647756							0.991885
			0.647828					0.991897					0.647828				0.991897	0.647828							0.991897
			0.64839					0.992005					0.64839				0.992005	0.64839							0.992005
			0.649371					0.992186					0.649371				0.992186	0.649371							0.992186
			0.649457					0.992266					0.649457				0.992266	0.649457							0.992266
			0.650408					0.992574					0.650408				0.992574	0.650408							0.992574
			0.651596					0.992651					0.651596				0.992651	0.651596							0.992651
			0.651902					0.995203					0.651902				0.995203	0.651902							0.995203
			0.652894					0.99582					0.652894				0.99582	0.652894							0.99582
			0.653392					0.996472					0.653392				0.996472	0.653392							0.996472
			0.653605					0.99653					0.653605				0.99653	0.653605							0.99653
			0.653899					0.996601					0.653899				0.996601	0.653899							0.996601
			0.655878					0.996719					0.655878				0.996719	0.655878							0.996719
			0.658929					0.996727					0.658929				0.996727	0.658929							0.996727
			0.660592					0.997396					0.660592				0.997396	0.660592							0.997396
			0.660672					0.997663					0.660672				0.997663	0.660672							0.997663
			0.66091					0.997875					0.66091				0.997875	0.66091							0.997875
			0.662317					0.998193					0.662317				0.998193	0.662317							0.998193
			0.662446					0.998349					0.662446				0.998349	0.662446							0.998349
			0.662517					0.998505					0.662517				0.998505	0.662517							0.998505
			0.662686					0.998549					0.662686				0.998549	0.662686							0.998549
			0.664149					1					0.664149				1	0.664149							1
			0.664429					1					0.664429				1	0.664429							1
			0.66549					1.00084					0.66549				1.00084	0.66549							1.00084
			0.666124					1.00091					0.666124				1.00091	0.666124							1.00091
			0.667569					1.00094					0.667569				1.00094	0.667569							1.00094
			0.668496					1.00165					0.668496				1.00165	0.668496							1.00165
			0.669347					1.00209					0.669347				1.00209	0.669347							1.00209
			0.66957					1.00212					0.66957				1.00212	0.66957							1.00212
			0.669805					1.00242					0.669805				1.00242	0.669805							1.00242
			0.670592					1.0026					0.670592				1.0026	0.670592							1.0026
			0.6713					1.00284					0.6713				1.00284	0.6713							1.00284
			0.672303					1.00303					0.672303				1.00303	0.672303							1.00303
			0.673779					1.00316					0.673779				1.00316	0.673779							1.00316
			0.673843					1.00337					0.673843				1.00337	0.673843							1.00337
			0.674595					1.00396					0.674595				1.00396	0.674595							1.00396
			0.677077					1.00414					0.677077				1.00414	0.677077							1.00414
			0.677303					1.00421					0.677303				1.00421	0.677303							1.00421
			0.677543					1.00428					0.677543				1.00428	0.677543							1.00428
			0.678818					1.0044					0.678818				1.0044	0.678818							1.0044
			0.67963					1.00475					0.67963				1.00475	0.67963							1.00475
			0.68175					1.00527					0.68175				1.00527	0.68175							1.00527
			0.682522					1.00578					0.682522				1.00578	0.682522							1.00578
			0.688351					1.00578					0.688351				1.00578	0.688351							1.00578
			0.690652					1.0062					0.690652				1.0062	0.690652							1.0062
			0.693475					1.00715					0.693475				1.00715	0.693475							1.00715
			0.693655					1.00745					0.693655				1.00745	0.693655							1.00745
			0.69428					1.00827					0.69428				1.00827	0.69428							1.00827
			0.69428					1.00837					0.69428				1.00837	0.69428							1.00837
			0.69466					1.00839					0.69466				1.00839	0.69466							1.00839
			0.696656					1.00927					0.696656				1.00927	0.696656							1.00927
			0.697046					1.00978					0.697046				1.00978	0.697046							1.00978
			0.697235					1.00984					0.697235				1.00984	0.697235							1.00984
			0.698074					1.0108					0.698074				1.0108	0.698074							1.0108
			0.69972					1.01109					0.69972				1.01109	0.69972							1.01109
			0.699764					1.01153					0.699764				1.01153	0.699764							1.01153
			0.700021					1.01235					0.700021				1.01235	0.700021							1.01235
			0.700162					1.01296					0.700162				1.01296	0.700162							1.01296
			0.700299					1.01305					0.700299				1.01305	0.700299							1.01305
			0.70129					1.01392					0.70129				1.01392	0.70129							1.01392
			0.701762					1.01411					0.701762				1.01411	0.701762							1.01411
			0.702317					1.01442					0.702317				1.01442	0.702317							1.01442
			0.703065					1.01512					0.703065				1.01512	0.703065							1.01512
			0.703078					1.0157					0.703078				1.0157	0.703078							1.0157
			0.705278					1.01639					0.705278				1.01639	0.705278							1.01639
			0.705809					1.01641					0.705809				1.01641	0.705809							1.01641
			0.706324					1.01646					0.706324				1.01646	0.706324							1.01646
			0.707075					1.01704					0.707075				1.01704	0.707075							1.01704
			0.70864					1.01758					0.70864				1.01758	0.70864							1.01758
			0.709485					1.01792					0.709485				1.01792	0.709485							1.01792
			0.710661					1.01851					0.710661				1.01851	0.710661							1.01851
			0.710957					1.0188					0.710957				1.0188	0.710957							1.0188
			0.717894					1.01881					0.717894				1.01881	0.717894							1.01881
			0.720858					1.01884					0.720858				1.01884	0.720858							1.01884
			0.721542					1.01899					0.721542				1.01899	0.721542							1.01899
			0.72234					1.02					0.72234				1.02	0.72234							1.02
			0.722538					1.02077					0.722538				1.02077	0.722538							1.02077
			0.722552					1.02091					0.722552				1.02091	0.722552							1.02091
			0.723521					1.02109					0.723521				1.02109	0.723521							1.02109
			0.724006					1.02111					0.724006				1.02111	0.724006							1.02111
			0.724131					1.02146					0.724131				1.02146	0.724131							1.02146
			0.72472					1.02155					0.72472				1.02155	0.72472							1.02155
			0.726352					1.02264					0.726352				1.02264	0.726352							1.02264
			0.72698					1.02328					0.72698				1.02328	0.72698							1.02328
			0.727187					1.0241					0.727187				1.0241	0.727187							1.0241
			0.727661					1.02576					0.727661				1.02576	0.727661							1.02576
			0.727796					1.02587					0.727796				1.02587	0.727796							1.02587
			0.728666					1.02611					0.728666				1.02611	0.728666							1.02611
			0.729867					1.02886					0.729867				1.02886	0.729867							1.02886
			0.729982					1.02921					0.729982				1.02921	0.729982							1.02921
			0.731003					1.03064					0.731003				1.03064	0.731003							1.03064
			0.732519					1.03073					0.732519				1.03073	0.732519							1.03073
			0.732531					1.03127					0.732531				1.03127	0.732531							1.03127
			0.733171					1.03178					0.733171				1.03178	0.733171							1.03178
			0.734152					1.0321					0.734152				1.0321	0.734152							1.0321
			0.734892					1.0325					0.734892				1.0325	0.734892							1.0325
			0.735844					1.03473					0.735844				1.03473	0.735844							1.03473
			0.736193					1.03587					0.736193				1.03587	0.736193							1.03587
			0.736581					1.03604					0.736581				1.03604	0.736581							1.03604
			0.737029					1.03664					0.737029				1.03664	0.737029							1.03664
			0.737601					1.03829					0.737601				1.03829	0.737601							1.03829
			0.739073					1.03936					0.739073				1.03936	0.739073							1.03936
			0.739813					1.04064					0.739813				1.04064	0.739813							1.04064
			0.741803					1.04154					0.741803				1.04154	0.741803							1.04154
			0.742135					1.04192					0.742135				1.04192	0.742135							1.04192
			0.744015					1.04253					0.744015				1.04253	0.744015							1.04253
			0.745538					1.04253					0.745538				1.04253	0.745538							1.04253
			0.746634					1.04349					0.746634				1.04349	0.746634							1.04349
			0.750826					1.04353					0.750826				1.04353	0.750826							1.04353
			0.750862					1.04369					0.750862				1.04369	0.750862							1.04369
			0.751023					1.04645					0.751023				1.04645	0.751023							1.04645
			0.752101					1.04708					0.752101				1.04708	0.752101							1.04708
			0.753705					1.0475					0.753705				1.0475	0.753705							1.0475
			0.75559					1.04769					0.75559				1.04769	0.75559							1.04769
			0.756951					1.04789					0.756951				1.04789	0.756951							1.04789
			0.757405					1.04849					0.757405				1.04849	0.757405							1.04849
			0.758044					1.04917					0.758044				1.04917	0.758044							1.04917
			0.758923					1.04924					0.758923				1.04924	0.758923							1.04924
			0.760003					1.04964					0.760003				1.04964	0.760003							1.04964
			0.761118					1.05345					0.761118				1.05345	0.761118							1.05345
			0.762738					1.05377					0.762738				1.05377	0.762738							1.05377
			0.762767					1.05397					0.762767				1.05397	0.762767							1.05397
			0.762898					1.05407					0.762898				1.05407	0.762898							1.05407
			0.764095					1.0554					0.764095				1.0554	0.764095							1.0554
			0.764189					1.05594					0.764189				1.05594	0.764189							1.05594
			0.764378					1.05689					0.764378				1.05689	0.764378							1.05689
			0.764813					1.05759					0.764813				1.05759	0.764813							1.05759
			0.765286					1.05908					0.765286				1.05908	0.765286							1.05908
			0.765532					1.05986					0.765532				1.05986	0.765532							1.05986
			0.765742					1.06087					0.765742				1.06087	0.765742							1.06087
			0.766727					1.06201					0.766727				1.06201	0.766727							1.06201
			0.767355					1.06397					0.767355				1.06397	0.767355							1.06397
			0.772948					1.06487					0.772948				1.06487	0.772948							1.06487
			0.773636					1.06611					0.773636				1.06611	0.773636							1.06611
			0.77438					1.06643					0.77438				1.06643	0.77438							1.06643
			0.777175					1.06681					0.777175				1.06681	0.777175							1.06681
			0.77736					1.06912					0.77736				1.06912	0.77736							1.06912
			0.777972					1.0692					0.777972				1.0692	0.777972							1.0692
			0.778777					1.06981					0.778777				1.06981	0.778777							1.06981
			0.779617					1.07017					0.779617				1.07017	0.779617							1.07017
			0.780409					1.0714					0.780409				1.0714	0.780409							1.0714
			0.781529					1.07305					0.781529				1.07305	0.781529							1.07305
			0.781875					1.0746					0.781875				1.0746	0.781875							1.0746
			0.782807					1.07462					0.782807				1.07462	0.782807							1.07462
			0.783111					1.07475					0.783111				1.07475	0.783111							1.07475
			0.784714					1.07534					0.784714				1.07534	0.784714							1.07534
			0.785496					1.0757					0.785496				1.0757	0.785496							1.0757
			0.790673					1.07684					0.790673				1.07684	0.790673							1.07684
			0.790962					1.07747					0.790962				1.07747	0.790962							1.07747
			0.791652					1.07758					0.791652				1.07758	0.791652							1.07758
			0.791746					1.07764					0.791746				1.07764	0.791746							1.07764
			0.793404					1.07857					0.793404				1.07857	0.793404							1.07857
			0.793612					1.07944					0.793612				1.07944	0.793612							1.07944
			0.793752					1.08174					0.793752				1.08174	0.793752							1.08174
			0.794472					1.08334					0.794472				1.08334	0.794472							1.08334
			0.794604					1.08351					0.794604				1.08351	0.794604							1.08351
			0.79962					1.08466					0.79962				1.08466	0.79962							1.08466
			0.800694					1.08475					0.800694				1.08475	0.800694							1.08475
			0.800765					1.0857					0.800765				1.0857	0.800765							1.0857
			0.804492					1.08652					0.804492				1.08652	0.804492							1.08652
			0.80622					1.08736					0.80622				1.08736	0.80622							1.08736
			0.809524					1.08781					0.809524				1.08781	0.809524							1.08781
			0.811954					1.08815					0.811954				1.08815	0.811954							1.08815
			0.812231					1.08958					0.812231				1.08958	0.812231							1.08958
			0.813622					1.08965					0.813622				1.08965	0.813622							1.08965
			0.81536					1.09015					0.81536				1.09015	0.81536							1.09015
			0.815447					1.09066					0.815447				1.09066	0.815447							1.09066
			0.816594					1.09092					0.816594				1.09092	0.816594							1.09092
			0.817377					1.09092					0.817377				1.09092	0.817377							1.09092
			0.818177					1.09161					0.818177				1.09161	0.818177							1.09161
			0.81924					1.09175					0.81924				1.09175	0.81924							1.09175
			0.822898					1.09376					0.822898				1.09376	0.822898							1.09376
			0.82292					1.09426					0.82292				1.09426	0.82292							1.09426
			0.824711					1.09504					0.824711				1.09504	0.824711							1.09504
			0.824789					1.09775					0.824789				1.09775	0.824789							1.09775
			0.825389					1.09916					0.825389				1.09916	0.825389							1.09916
			0.826294					1.09917					0.826294				1.09917	0.826294							1.09917
			0.826697					1.09931					0.826697				1.09931	0.826697							1.09931
			0.828848					1.10053					0.828848				1.10053	0.828848							1.10053
			0.830193					1.10193					0.830193				1.10193	0.830193							1.10193
			0.830328					1.10236					0.830328				1.10236	0.830328							1.10236
			0.831171					1.10303					0.831171				1.10303	0.831171							1.10303
			0.831759					1.10374					0.831759				1.10374	0.831759							1.10374
			0.832559					1.10436					0.832559				1.10436	0.832559							1.10436
			0.835868					1.10473					0.835868				1.10473	0.835868							1.10473
			0.836037					1.10475					0.836037				1.10475	0.836037							1.10475
			0.840004					1.10569					0.840004				1.10569	0.840004							1.10569
			0.842627					1.10772					0.842627				1.10772	0.842627							1.10772
			0.844538					1.10884					0.844538				1.10884	0.844538							1.10884
			0.845959					1.11077					0.845959				1.11077	0.845959							1.11077
			0.846369					1.11147					0.846369				1.11147	0.846369							1.11147
			0.849896					1.11184					0.849896				1.11184	0.849896							1.11184
			0.849989					1.11746					0.849989				1.11746	0.849989							1.11746
			0.851011					1.11791					0.851011				1.11791	0.851011							1.11791
			0.851548					1.1188					0.851548				1.1188	0.851548							1.1188
			0.852512					1.11891					0.852512				1.11891	0.852512							1.11891
			0.854074					1.12034					0.854074				1.12034	0.854074							1.12034
			0.854263					1.12074					0.854263				1.12074	0.854263							1.12074
			0.85504					1.12147					0.85504				1.12147	0.85504							1.12147
			0.855935					1.12401					0.855935				1.12401	0.855935							1.12401
			0.860968					1.12565					0.860968				1.12565	0.860968							1.12565
			0.861619					1.12578					0.861619				1.12578	0.861619							1.12578
			0.861789					1.12743					0.861789				1.12743	0.861789							1.12743
			0.862202					1.12773					0.862202				1.12773	0.862202							1.12773
			0.862869					1.12776					0.862869				1.12776	0.862869							1.12776
			0.863348					1.12801					0.863348				1.12801	0.863348							1.12801
			0.864394					1.12803					0.864394				1.12803	0.864394							1.12803
			0.867317					1.12824					0.867317				1.12824	0.867317							1.12824
			0.873131					1.1287					0.873131				1.1287	0.873131							1.1287
			0.875769					1.12888					0.875769				1.12888	0.875769							1.12888
			0.880626					1.12993					0.880626				1.12993	0.880626							1.12993
			0.880688					1.13063					0.880688				1.13063	0.880688							1.13063
			0.882697					1.13314					0.882697				1.13314	0.882697							1.13314
			0.884198					1.13378					0.884198				1.13378	0.884198							1.13378
			0.884676					1.13519					0.884676				1.13519	0.884676							1.13519
			0.888317					1.13704					0.888317				1.13704	0.888317							1.13704
			0.892239					1.13915					0.892239				1.13915	0.892239							1.13915
			0.895475					1.14133					0.895475				1.14133	0.895475							1.14133
			0.897877					1.14169					0.897877				1.14169	0.897877							1.14169
			0.902116					1.14274					0.902116				1.14274	0.902116							1.14274
			0.903087					1.14283					0.903087				1.14283	0.903087							1.14283
			0.903729					1.14471					0.903729				1.14471	0.903729							1.14471
			0.904084					1.14497					0.904084				1.14497	0.904084							1.14497
			0.905339					1.14714					0.905339				1.14714	0.905339							1.14714
			0.906531					1.14904					0.906531				1.14904	0.906531							1.14904
			0.907675					1.15092					0.907675				1.15092	0.907675							1.15092
			0.910172					1.151					0.910172				1.151	0.910172							1.151
			0.910539					1.15178					0.910539				1.15178	0.910539							1.15178
			0.911571					1.15231					0.911571				1.15231	0.911571							1.15231
			0.911819					1.15361					0.911819				1.15361	0.911819							1.15361
			0.915721					1.15409					0.915721				1.15409	0.915721							1.15409
			0.915741					1.1547					0.915741				1.1547	0.915741							1.1547
			0.921039					1.15657					0.921039				1.15657	0.921039							1.15657
			0.923201					1.15973					0.923201				1.15973	0.923201							1.15973
			0.927712					1.16688					0.927712				1.16688	0.927712							1.16688
			0.92844					1.16881					0.92844				1.16881	0.92844							1.16881
			0.929797					1.17045					0.929797				1.17045	0.929797							1.17045
			0.93031					1.17481					0.93031				1.17481	0.93031							1.17481
			0.934995					1.17579					0.934995				1.17579	0.934995							1.17579
			0.935042					1.17738					0.935042				1.17738	0.935042							1.17738
			0.947469					1.17926					0.947469				1.17926	0.947469							1.17926
			0.949465					1.18112					0.949465				1.18112	0.949465							1.18112
			0.955087					1.18295					0.955087				1.18295	0.955087							1.18295
			0.955276					1.18305					0.955276				1.18305	0.955276							1.18305
			0.956718					1.18414					0.956718				1.18414	0.956718							1.18414
			0.96424					1.18494					0.96424				1.18494	0.96424							1.18494
			0.968667					1.18518					0.968667				1.18518	0.968667							1.18518
			0.970842					1.1869					0.970842				1.1869	0.970842							1.1869
			0.97333					1.19241					0.97333				1.19241	0.97333							1.19241
			0.973415					1.19325					0.973415				1.19325	0.973415							1.19325
			0.974325					1.19652					0.974325				1.19652	0.974325							1.19652
			0.977631					1.19728					0.977631				1.19728	0.977631							1.19728
			0.983407					1.20738					0.983407				1.20738	0.983407							1.20738
			0.988873					1.20911					0.988873				1.20911	0.988873							1.20911
			0.994771					1.21					0.994771				1.21	0.994771							1.21
			1.00113					1.21291					1.00113				1.21291	1.00113							1.21291
			1.00512					1.21591					1.00512				1.21591	1.00512							1.21591
			1.01727					1.21921					1.01727				1.21921	1.01727							1.21921
			1.04396					1.22192					1.04396				1.22192	1.04396							1.22192
			1.04496					1.22487					1.04496				1.22487	1.04496							1.22487
			1.09144					1.2259					1.09144				1.2259	1.09144							1.2259
			1.09606					1.226					1.09606				1.226	1.09606							1.226
			1.09793					1.22805					1.09793				1.22805	1.09793							1.22805
			1.23046					1.22943					1.23046				1.22943	1.23046							1.22943
			1.23438					1.23058					1.23438				1.23058	1.23438							1.23058
								1.23124									1.23124								1.23124
								1.23323									1.23323								1.23323
								1.23401									1.23401								1.23401
								1.23869									1.23869								1.23869
								1.2387									1.2387								1.2387
								1.23969									1.23969								1.23969
								1.24307									1.24307								1.24307
								1.24355									1.24355								1.24355
								1.24723									1.24723								1.24723
								1.25867									1.25867								1.25867
								1.25908									1.25908								1.25908
								1.25919									1.25919								1.25919
								1.26493									1.26493								1.26493
								1.26851									1.26851								1.26851
								1.26971									1.26971								1.26971
								1.27023									1.27023								1.27023
								1.2703									1.2703								1.2703
								1.27546									1.27546								1.27546
								1.27679									1.27679								1.27679
								1.27985									1.27985								1.27985
								1.28348									1.28348								1.28348
								1.28447									1.28447								1.28447
								1.28484									1.28484								1.28484
								1.28824									1.28824								1.28824
								1.29147									1.29147								1.29147
								1.29159									1.29159								1.29159
								1.30522									1.30522								1.30522
								1.3103									1.3103								1.3103
								1.31208									1.31208								1.31208
								1.31218									1.31218								1.31218
								1.3235									1.3235								1.3235
								1.32701									1.32701								1.32701
								1.33016									1.33016								1.33016
								1.33362									1.33362								1.33362
								1.33631									1.33631								1.33631
								1.33689									1.33689								1.33689
								1.35241									1.35241								1.35241
								1.35433									1.35433								1.35433
								1.36162									1.36162								1.36162
								1.36308									1.36308								1.36308
								1.36509									1.36509								1.36509
								1.36816									1.36816								1.36816
								1.37794									1.37794								1.37794
								1.37845									1.37845								1.37845
								1.39113									1.39113								1.39113
								1.39294									1.39294								1.39294
								1.39408									1.39408								1.39408
								1.39763									1.39763								1.39763
								1.40239									1.40239								1.40239
								1.40256									1.40256								1.40256
								1.40334									1.40334								1.40334
								1.40668									1.40668								1.40668
								1.40904									1.40904								1.40904
								1.41025									1.41025								1.41025
								1.41042									1.41042								1.41042
								1.41439									1.41439								1.41439
								1.43022									1.43022								1.43022
								1.43112									1.43112								1.43112
								1.44125									1.44125								1.44125
								1.44357									1.44357								1.44357
								1.45075									1.45075								1.45075
								1.45209									1.45209								1.45209
								1.45288									1.45288								1.45288
								1.4648									1.4648								1.4648
								1.46757									1.46757								1.46757
								1.476									1.476								1.476
								1.48355									1.48355								1.48355
								1.48989									1.48989								1.48989
								1.49342									1.49342								1.49342
								1.49613									1.49613								1.49613
								1.49617									1.49617								1.49617
								1.4994									1.4994								1.4994
								1.55809									1.55809								1.55809
								1.58471									1.58471								1.58471
								1.58631									1.58631								1.58631
								1.58977									1.58977								1.58977
								1.59497									1.59497								1.59497
								1.61158									1.61158								1.61158
								1.63065									1.63065								1.63065
								1.63489									1.63489								1.63489
								1.63898									1.63898								1.63898
								1.64989									1.64989								1.64989
								1.71303									1.71303								1.71303
								1.73762									1.73762								1.73762
								1.79148									1.79148								1.79148
								1.79234									1.79234								1.79234
								1.80987									1.80987								1.80987
								1.8401									1.8401								1.8401
								1.84564									1.84564								1.84564
								1.84954									1.84954								1.84954
								1.85168									1.85168								1.85168
								1.8783									1.8783								1.8783
								1.93723									1.93723								1.93723
								1.94589									1.94589								1.94589
								1.95316									1.95316								1.95316
								2.09105									2.09105								2.09105
								2.37342									2.37342								2.37342
								2.54606									2.54606								2.54606
