# Supplementary material for: Multiple antagonist calcium-dependent mechanisms control CaM kinase-1 subcellular localization in a C. elegans thermal nociceptor
Source: eLife. 2023 May 11;12:e85260. doi: 10.7554/eLife.85260 (PMC10174685; doi:10.7554/eLife.85260)
Supplement: Figure 4—source data 1. [file elife-85260-fig4-data1.xlsx]

## Sheet: Figure 4 source data
Figure 4 source data
Figure 4C
28°C	20°C	28°C	20°C	28°C	20°C
CKK-1b	CKK-1b	CKK-1a	CKK-1a	CMK-1(wt)	CMK-1(wt)
0.658023	0.413015	0.506478	0.373232	0.578588	0.480828
0.575887	0.507191	0.532614	0.479613	0.705196	0.486801
0.705379	0.619399	0.624693	0.647585	0.725342	0.520754
0.84954	0.695821	0.627903	0.734888	0.730038	0.529117
1.04274	0.920482	0.672366	0.739687	0.755094	0.567313
1.34403	0.980412	0.760861	0.750038	0.80411	0.576562
1.99475	0.984985	0.811073	0.827459	0.811558	0.586686
0.357514	1.07535	0.93429	0.92728	0.822015	0.598768
0.233852	1.1717	0.986944	1.14538	0.850008	0.608595
0.473457	1.48527	1.25312	0.382369	0.865213	0.616988
0.649679	0.306463	1.26604	0.465931	0.892529	0.665956
0.931966	0.445577	1.31967	0.474512	0.897159	0.668625
0.545642	0.626861	0.366876	0.483041	0.897853	0.672258
0.562345	0.870511	0.374843	0.515985	0.901035	0.674762
0.593735	0.415182	0.390793	0.524895	0.923345	0.684085
0.609125	0.436738	0.459693	0.53531	0.97678	0.703357
0.640138	0.511026	0.45988	0.537314	0.98125	0.707565
0.699298	0.522349	0.460738	0.550703	1	0.720003
0.732031	0.540735	0.462634	0.551992	1.02304	0.73309
0.754599	0.661376	0.475494	0.556923	1.02749	0.734637
0.813001	0.804976	0.479432	0.559946	1.04367	0.748332
0.850427	1.13461	0.485134	0.574423	1.05333	0.750189
0.863574	0.570384	0.491178	0.579321	1.05937	0.757595
0.871548	0.594334	0.494676	0.586932	1.07528	0.76803
0.915669	0.724595	0.499476	0.587952	1.07719	0.774928
0.916147	0.739755	0.502695	0.597654	1.10502	0.786624
0.940811	0.758719	0.516921	0.610162	1.1274	0.790375
0.943569	1.51676	0.529514	0.618763	1.12996	0.792435
1.00646	0.431149	0.543597	0.622578	1.14303	0.795605
1.19037	0.458391	0.545109	0.636345	1.16289	0.813023
	0.469838	0.565421	0.647	1.16499	0.813499
	0.580276	0.577605	0.660981	1.16892	0.818175
	0.597028	0.585596	0.661271	1.17691	0.81854
	0.651059	0.586886	0.681028	1.17941	0.823543
	0.6559	0.587205	0.694473	1.18107	0.823916
	0.790223	0.588134	0.69751	1.20076	0.829129
	0.826445	0.592133	0.698353	1.20948	0.834723
	0.840963	0.594435	0.705432	1.21398	0.852824
	0.843216	0.594898	0.711354	1.22488	0.877868
	0.895784	0.596928	0.722233	1.22589	0.890019
	0.971457	0.605156	0.728064	1.22727	0.891376
	0.989645	0.611112	0.743144	1.23836	0.908548
		0.615478	0.749194	1.24555	0.914115
		0.619841	0.751112	1.25344	0.931481
		0.62059	0.753675	1.25421	0.973382
		0.637328	0.763414	1.28688	0.985602
		0.642734	0.766545	1.29809	0.996518
		0.652785	0.769257	1.40315	1.02372
		0.654438	0.773704	1.40536	1.05505
		0.666626	0.820319	1.41116	1.07616
		0.670479	0.827868	1.43148	1.12016
		0.676977	0.834231	1.44807
		0.677701	0.85148	1.48951
		0.679151	0.855329	1.53192
		0.686398	0.891216	1.56743
		0.686492	0.895341	1.60459
		0.68653	0.927541	1.61351
		0.691069	0.953172	1.61451
		0.702256	0.967846	1.64158
		0.706974	0.986797	1.64559
		0.71718	1.025	1.6636
		0.721879	1.0966	1.7633
		0.738276	0.552037	2.02465
		0.743992	0.657327	2.07647
		0.747205	0.669916
		0.768591	0.768246
		0.779027	0.782849
		0.779442	0.784634
		0.77956	0.201609
		0.786553	0.208061
		0.799725	0.298752
		0.801602	0.31396
		0.824016	0.328132
		0.832863	0.343618
		0.838343	0.401687
		0.853462	0.426708
		0.862666	0.431912
		0.871574	0.476058
		0.875005	0.478528
		0.886171	0.482145
		0.946061	0.48275
		0.990982	0.486423
		1.01676	0.489716
		1.05379	0.493328
		1.10427	0.496175
		1.16481	0.498133
		1.21463	0.498232
		1.41215	0.502944
		1.51633	0.511951
		0.523735	0.513287
		1.21394	0.51784
		0.179286	0.530448
		0.210014	0.551724
		0.279651	0.557698
		0.318982	0.561688
		0.409126	0.568267
		0.46178	0.570269
		0.480281	0.585762
		0.501085	0.594032
		0.5116	0.615509
		0.513143	0.62234
		0.577106	0.661129
		0.579544	0.688835
		0.614605	0.700458
		0.618042	0.701711
		0.620331	0.706394
		0.636681	0.706737
		0.636892	0.707063
		0.649839	0.716053
		0.653189	0.71726
		0.658542	0.733095
		0.660777	0.752834
		0.660878	0.76046
		0.663548	0.768445
		0.668247	0.81189
		0.668539	0.827991
		0.689505	0.837898
		0.690812	0.843194
		0.71517	0.86715
		0.726668	0.88212
		0.731816	0.883968
		0.747943	1.17138
		0.749097	0.354615
		0.750986	0.387011
		0.767468	0.43287
		0.783127	0.459181
		0.817834	0.504088
		0.820701	0.515094
		0.822348	0.515778
		0.822767	0.521234
		0.846646	0.529503
		0.858256	0.545462
		0.867487	0.54577
		0.883668	0.55109
		0.922567	0.554593
		0.934144	0.566059
		0.948805	0.567839
		1	0.57716
		1.00612	0.58135
		1.03687	0.582391
		1.05367	0.586205
		1.084	0.588275
		1.17009	0.589516
		1.24733	0.602348
		1.3547	0.603332
		0.282683	0.610153
		0.344545	0.610824
		0.360544	0.61323
		0.403733	0.614668
		0.42596	0.619234
		0.442967	0.620139
		0.454295	0.6267
		0.456857	0.627575
		0.463782	0.628753
		0.467518	0.634205
		0.471464	0.646357
		0.476657	0.649491
		0.477155	0.65013
		0.487098	0.65043
		0.487378	0.652837
		0.495267	0.659828
		0.495411	0.663459
		0.497361	0.666577
		0.506234	0.674309
		0.510254	0.677191
		0.523928	0.679682
		0.527939	0.683114
		0.530165	0.683179
		0.531699	0.683444
		0.540195	0.691559
		0.55009	0.699345
		0.554314	0.699703
		0.565789	0.700993
		0.566123	0.702158
		0.569414	0.705841
		0.578739	0.70843
		0.58309	0.709874
		0.588375	0.710564
		0.591011	0.718519
		0.592153	0.718764
		0.592211	0.720654
		0.594247	0.722618
		0.6113	0.732125
		0.612303	0.735414
		0.613196	0.7371
		0.621323	0.737755
		0.622299	0.751608
		0.622925	0.752017
		0.623364	0.753163
		0.629354	0.756023
		0.633667	0.76017
		0.637359	0.762581
		0.639457	0.767482
		0.643475	0.767948
		0.644678	0.768494
		0.646962	0.772885
		0.647824	0.777103
		0.648631	0.782456
		0.653735	0.783946
		0.6548	0.789748
		0.65675	0.794327
		0.657854	0.796807
		0.658708	0.797448
		0.663269	0.797845
		0.665968	0.800764
		0.667921	0.806442
		0.668044	0.80685
		0.671764	0.806887
		0.671862	0.811587
		0.676172	0.815022
		0.677951	0.817867
		0.679955	0.84089
		0.680496	0.841333
		0.682886	0.849487
		0.691922	0.862719
		0.69419	0.866653
		0.694435	0.887052
		0.694989	0.890062
		0.695926	0.890151
		0.701834	0.891507
		0.702563	0.902578
		0.708526	0.905458
		0.720638	0.912313
		0.721542	0.913161
		0.721997	0.917766
		0.724633	0.921642
		0.725246	0.937552
		0.725882	0.979986
		0.726517	0.980665
		0.732784	0.996651
		0.73368	1
		0.737807	1.0781
		0.739242	1.14549
		0.740273	1.29745
		0.741071
		0.742083
		0.74276
		0.743356
		0.744649
		0.744867
		0.754471
		0.756615
		0.762263
		0.767815
		0.77499
		0.785006
		0.788333
		0.791659
		0.792616
		0.797437
		0.799979
		0.815793
		0.821258
		0.835662
		0.836435
		0.843881
		0.844755
		0.845543
		0.869563
		0.8857
		0.889908
		0.891049
		0.895733
		0.946172
		0.972691
		0.976862
		1.00875
		1.01623
		1.04753
		1.20862
		1.35747
		1.63696
